# Supplementary material for: Effects of Intensive Fattening With Total Mixed Rations on Carcass Characteristics, Meat Quality, and Meat Chemical Composition of Yak and Mechanism Based on Serum and Transcriptomic Profiles
Source: Front Vet Sci. 2021 Jan 21;7:599418. doi: 10.3389/fvets.2020.599418 (PMC7859351; doi:10.3389/fvets.2020.599418)
Supplement: Supplementary file 1 [file Table_1.xlsx]

## Sheet: Table S1
Table S1 Fattening vs Grazing_KEGG enrichlist
KEGGID	Description	GeneRatio	BgRatio	pvalue	padj	geneID	geneName	keggID	Count	Up	Up_Gene_names	Down	Down_Gene_names
bom04973	Carbohydrate digestion and absorption	6/158	35/6400	0.000184671	0.0443211	ENSBMUG00000013197/ENSBMUG00000018621/ENSBMUG00000016316/ENSBMUG00000018416/ENSBMUG00000001510/ENSBMUG00000001798	ATP1A4/P3R3URF/ATP1A1/HK3/SLC2A5/-	bom:102272122/bom:102280296/bom:102287260/bom:102275095/bom:102266649/bom:102283818	6	1	ENSBMUG00000016316	5	ENSBMUG00000013197/ENSBMUG00000018621/ENSBMUG00000018416/ENSBMUG00000001510/ENSBMUG00000001798
bom04066	HIF-1 signaling pathway	9/158	97/6400	0.000605574	0.0726689	ENSBMUG00000011730/ENSBMUG00000018621/ENSBMUG00000006144/ENSBMUG00000013257/ENSBMUG00000018416/ENSBMUG00000016032/ENSBMUG00000006339/ENSBMUG00000014160/ENSBMUG00000010817	PGK2/P3R3URF/SERPINE1/PDHA2/HK3/ANGPT4/EIF4EBP1/HMOX1/IL6R	bom:102268739/bom:102280296/bom:102275884/bom:102286090/bom:102275095/bom:102281947/bom:102278368/bom:102281265/bom:102287439	9	2	ENSBMUG00000014160/ENSBMUG00000010817	7	ENSBMUG00000011730/ENSBMUG00000018621/ENSBMUG00000006144/ENSBMUG00000013257/ENSBMUG00000018416/ENSBMUG00000016032/ENSBMUG00000006339
bom00730	Thiamine metabolism	3/158	12/6400	0.00275682	0.220546	ENSBMUG00000021688/ENSBMUG00000006980/ENSBMUG00000003890	ALPL/-/AK8	bom:102271651/bom:102280102/bom:102280423	3	1	ENSBMUG00000021688	2	ENSBMUG00000006980/ENSBMUG00000003890
bom05230	Central carbon metabolism in cancer	6/158	61/6400	0.00372724	0.223634	novel.1242/ENSBMUG00000018621/ENSBMUG00000013257/ENSBMUG00000018416/ENSBMUG00000008022/ENSBMUG00000002904	-/P3R3URF/PDHA2/HK3/MYC/-	bom:102269074/bom:102280296/bom:102286090/bom:102275095/bom:102274304/bom:102266155	6	2	novel.1242/ENSBMUG00000002904	4	ENSBMUG00000018621/ENSBMUG00000013257/ENSBMUG00000018416/ENSBMUG00000008022
bom00061	Fatty acid biosynthesis	3/158	16/6400	0.00652678	0.288973	ENSBMUG00000022222/ENSBMUG00000015068/ENSBMUG00000006069	ACACB/-/ACSL1	bom:102275206/bom:102276039/bom:102287851	3	2	ENSBMUG00000022222/ENSBMUG00000006069	1	ENSBMUG00000015068
bom04960	Aldosterone-regulated sodium reabsorption	4/158	34/6400	0.00931703	0.288973	ENSBMUG00000013197/ENSBMUG00000018621/ENSBMUG00000016316/ENSBMUG00000008417	ATP1A4/P3R3URF/ATP1A1/SGK1	bom:102272122/bom:102280296/bom:102287260/bom:102272039	4	1	ENSBMUG00000016316	3	ENSBMUG00000013197/ENSBMUG00000018621/ENSBMUG00000008417
bom04061	Viral protein interaction with cytokine and cytokine receptor	6/158	75/6400	0.0101978	0.288973	ENSBMUG00000018298/ENSBMUG00000010817/ENSBMUG00000013512/ENSBMUG00000013532/ENSBMUG00000013488/ENSBMUG00000007774	CCL21/IL6R/-/CCL2/-/CCL24	bom:102279199/bom:102287439/bom:102270698/bom:102271913/bom:106701034/bom:102284034	6	1	ENSBMUG00000010817	5	ENSBMUG00000018298/ENSBMUG00000013512/ENSBMUG00000013532/ENSBMUG00000013488/ENSBMUG00000007774
bom04614	Renin-angiotensin system	3/158	19/6400	0.0106986	0.288973	ENSBMUG00000007047/ENSBMUG00000022187/ENSBMUG00000024689	AGT/CPA3/-	bom:102274045/bom:102265447/bom:102273543	3	1	ENSBMUG00000007047	2	ENSBMUG00000022187/ENSBMUG00000024689
bom00790	Folate biosynthesis	3/158	20/6400	0.0123621	0.288973	ENSBMUG00000021688/ENSBMUG00000006980/ENSBMUG00000009991	ALPL/-/PAH	bom:102271651/bom:102280102/bom:102273628	3	1	ENSBMUG00000021688	2	ENSBMUG00000006980/ENSBMUG00000009991
bom04930	Type II diabetes mellitus	4/158	39/6400	0.0150285	0.288973	ENSBMUG00000006128/ENSBMUG00000018621/ENSBMUG00000018416/ENSBMUG00000000305	SOCS2/P3R3URF/HK3/PRKCD	bom:102268022/bom:102280296/bom:102275095/bom:102273901	4	0		4	ENSBMUG00000006128/ENSBMUG00000018621/ENSBMUG00000018416/ENSBMUG00000000305
bom04964	Proximal tubule bicarbonate reclamation	3/158	22/6400	0.0161103	0.288973	ENSBMUG00000013197/ENSBMUG00000007263/ENSBMUG00000016316	ATP1A4/SLC4A4/ATP1A1	bom:102272122/bom:102268544/bom:102287260	3	2	ENSBMUG00000007263/ENSBMUG00000016316	1	ENSBMUG00000013197
bom04974	Protein digestion and absorption	6/158	83/6400	0.0162864	0.288973	ENSBMUG00000017781/ENSBMUG00000013197/ENSBMUG00000016316/ENSBMUG00000023664/ENSBMUG00000022187/ENSBMUG00000016279	SLC7A8/ATP1A4/ATP1A1/SLC3A2/CPA3/-	bom:102276177/bom:102272122/bom:102287260/bom:102275454/bom:102265447/bom:102285676	6	3	ENSBMUG00000017781/ENSBMUG00000016316/ENSBMUG00000023664	3	ENSBMUG00000013197/ENSBMUG00000022187/ENSBMUG00000016279
bom00010	Glycolysis / Gluconeogenesis	5/158	61/6400	0.0168568	0.288973	ENSBMUG00000011730/ENSBMUG00000016744/ENSBMUG00000013257/ENSBMUG00000010974/ENSBMUG00000018416	PGK2/GAPDHS/PDHA2/FBP1/HK3	bom:102268739/bom:102272712/bom:102286090/bom:102285847/bom:102275095	5	0		5	ENSBMUG00000011730/ENSBMUG00000016744/ENSBMUG00000013257/ENSBMUG00000010974/ENSBMUG00000018416
bom05221	Acute myeloid leukemia	5/158	61/6400	0.0168568	0.288973	ENSBMUG00000016787/ENSBMUG00000018621/ENSBMUG00000008022/ENSBMUG00000006339/ENSBMUG00000018299	PER2/P3R3URF/MYC/EIF4EBP1/LEF1	bom:102272325/bom:102280296/bom:102274304/bom:102278368/bom:102266946	5	0		5	ENSBMUG00000016787/ENSBMUG00000018621/ENSBMUG00000008022/ENSBMUG00000006339/ENSBMUG00000018299
bom04270	Vascular smooth muscle contraction	7/158	111/6400	0.0195119	0.295153	ENSBMUG00000000391/ENSBMUG00000007047/ENSBMUG00000017192/ENSBMUG00000000305/ENSBMUG00000011295/ENSBMUG00000006546/ENSBMUG00000009284	MRVI1/AGT/MYL6B/PRKCD/MYLK3/KCNU1/PRKG1	bom:102278336/bom:102274045/bom:102275160/bom:102273901/bom:102275601/bom:102279494/bom:102279305	7	2	ENSBMUG00000000391/ENSBMUG00000007047	5	ENSBMUG00000017192/ENSBMUG00000000305/ENSBMUG00000011295/ENSBMUG00000006546/ENSBMUG00000009284
bom04216	Ferroptosis	4/158	43/6400	0.0209067	0.295153	ENSBMUG00000023664/ENSBMUG00000014160/ENSBMUG00000015068/ENSBMUG00000006069	SLC3A2/HMOX1/-/ACSL1	bom:102275454/bom:102281265/bom:102276039/bom:102287851	4	3	ENSBMUG00000023664/ENSBMUG00000014160/ENSBMUG00000006069	1	ENSBMUG00000015068
bom04978	Mineral absorption	4/158	43/6400	0.0209067	0.295153	ENSBMUG00000013197/ENSBMUG00000016316/ENSBMUG00000014160/ENSBMUG00000001798	ATP1A4/ATP1A1/HMOX1/-	bom:102272122/bom:102287260/bom:102281265/bom:102283818	4	2	ENSBMUG00000016316/ENSBMUG00000014160	2	ENSBMUG00000013197/ENSBMUG00000001798
bom05144	Malaria	4/158	46/6400	0.0261252	0.348336	ENSBMUG00000007932/ENSBMUG00000015225/ENSBMUG00000024501/ENSBMUG00000013532	-/COMP/-/CCL2	bom:102279228/bom:102267028/bom:102268919/bom:102271913	4	2	ENSBMUG00000007932/ENSBMUG00000024501	2	ENSBMUG00000015225/ENSBMUG00000013532
bom00072	Synthesis and degradation of ketone bodies	2/158	11/6400	0.0287792	0.363526	ENSBMUG00000012523/ENSBMUG00000000469	-/-	bom:102286272/bom:102283259	2	0		2	ENSBMUG00000012523/ENSBMUG00000000469
bom04610	Complement and coagulation cascades	5/158	76/6400	0.0391031	0.469237	ENSBMUG00000006530/ENSBMUG00000006144/ENSBMUG00000007356/ENSBMUG00000016760/ENSBMUG00000013075	-/SERPINE1/F12/-/F7	bom:102267775/bom:102275884/bom:102271184/bom:102280489/bom:102272114	5	0		5	ENSBMUG00000006530/ENSBMUG00000006144/ENSBMUG00000007356/ENSBMUG00000016760/ENSBMUG00000013075
bom04152	AMPK signaling pathway	6/158	111/6400	0.0560566	0.623659	ENSBMUG00000022222/ENSBMUG00000018621/ENSBMUG00000010974/ENSBMUG00000006339/ENSBMUG00000008641/ENSBMUG00000013760	ACACB/P3R3URF/FBP1/EIF4EBP1/EEF2K/CCNA1	bom:102275206/bom:102280296/bom:102285847/bom:102278368/bom:102283488/bom:102276514	6	2	ENSBMUG00000022222/ENSBMUG00000008641	4	ENSBMUG00000018621/ENSBMUG00000010974/ENSBMUG00000006339/ENSBMUG00000013760
bom04062	Chemokine signaling pathway	8/158	169/6400	0.0571687	0.623659	ENSBMUG00000018621/ENSBMUG00000025302/ENSBMUG00000000305/ENSBMUG00000018298/ENSBMUG00000013512/ENSBMUG00000013532/ENSBMUG00000013488/ENSBMUG00000007774	P3R3URF/GRK4/PRKCD/CCL21/-/CCL2/-/CCL24	bom:102280296/bom:102283303/bom:102273901/bom:102279199/bom:102270698/bom:102271913/bom:106701034/bom:102284034	8	0		8	ENSBMUG00000018621/ENSBMUG00000025302/ENSBMUG00000000305/ENSBMUG00000018298/ENSBMUG00000013512/ENSBMUG00000013532/ENSBMUG00000013488/ENSBMUG00000007774
bom05322	Systemic lupus erythematosus	5/158	89/6400	0.0683952	0.713689	ENSBMUG00000010258/ENSBMUG00000023384/ENSBMUG00000010530/ENSBMUG00000021271/ENSBMUG00000009060	-/-/-/-/GRIN2B	bom:102286562/bom:102282517/bom:102270543/bom:102264563/bom:102273574	5	0		5	ENSBMUG00000010258/ENSBMUG00000023384/ENSBMUG00000010530/ENSBMUG00000021271/ENSBMUG00000009060
bom04976	Bile secretion	4/158	66/6400	0.079466	0.749525	ENSBMUG00000013197/ENSBMUG00000007263/ENSBMUG00000016316/ENSBMUG00000001798	ATP1A4/SLC4A4/ATP1A1/-	bom:102272122/bom:102268544/bom:102287260/bom:102283818	4	2	ENSBMUG00000007263/ENSBMUG00000016316	2	ENSBMUG00000013197/ENSBMUG00000001798
bom05034	Alcoholism	6/158	122/6400	0.0806411	0.749525	ENSBMUG00000010258/ENSBMUG00000023384/ENSBMUG00000026402/ENSBMUG00000010530/ENSBMUG00000021271/ENSBMUG00000009060	122/6400	bom:102286562/bom:102282517/bom:102277833/bom:102270543/bom:102264563/bom:102273574	6	0		6	ENSBMUG00000010258/ENSBMUG00000023384/ENSBMUG00000026402/ENSBMUG00000010530/ENSBMUG00000021271/ENSBMUG00000009060
bom00980	Metabolism of xenobiotics by cytochrome P450	3/158	42/6400	0.0842736	0.749525	ENSBMUG00000022761/ENSBMUG00000005861/ENSBMUG00000023225	GSTT4/GSTO2/CYP2S1	bom:102276933/bom:102288026/bom:102282525	3	0		3	ENSBMUG00000022761/ENSBMUG00000005861/ENSBMUG00000023225
bom04910	Insulin signaling pathway	6/158	125/6400	0.0882504	0.749525	ENSBMUG00000006128/ENSBMUG00000022222/ENSBMUG00000018621/ENSBMUG00000010974/ENSBMUG00000018416/ENSBMUG00000006339	SOCS2/ACACB/P3R3URF/FBP1/HK3/EIF4EBP1	bom:102268022/bom:102275206/bom:102280296/bom:102285847/bom:102275095/bom:102278368	6	1	ENSBMUG00000022222	5	ENSBMUG00000006128/ENSBMUG00000018621/ENSBMUG00000010974/ENSBMUG00000018416/ENSBMUG00000006339
bom01524	Platinum drug resistance	4/158	69/6400	0.0901897	0.749525	ENSBMUG00000018621/ENSBMUG00000022761/ENSBMUG00000005861/ENSBMUG00000016980	P3R3URF/GSTT4/GSTO2/ATP7A	bom:102280296/bom:102276933/bom:102288026/bom:102277252	4	0		4	ENSBMUG00000018621/ENSBMUG00000022761/ENSBMUG00000005861/ENSBMUG00000016980
bom04933	AGE-RAGE signaling pathway in diabetic complications	5/158	97/6400	0.0911388	0.749525	ENSBMUG00000018621/ENSBMUG00000006144/ENSBMUG00000007047/ENSBMUG00000000305/ENSBMUG00000013532	P3R3URF/SERPINE1/AGT/PRKCD/CCL2	bom:102280296/bom:102275884/bom:102274045/bom:102273901/bom:102271913	5	1	ENSBMUG00000007047	4	ENSBMUG00000018621/ENSBMUG00000006144/ENSBMUG00000000305/ENSBMUG00000013532
bom00360	Phenylalanine metabolism	2/158	21/6400	0.0936906	0.749525	ENSBMUG00000005040/ENSBMUG00000009991	-/PAH	bom:102265076/bom:102273628	2	0		2	ENSBMUG00000005040/ENSBMUG00000009991
bom04012	ErbB signaling pathway	4/158	73/6400	0.105506	0.781662	ENSBMUG00000018621/ENSBMUG00000008022/ENSBMUG00000006339/ENSBMUG00000014920	P3R3URF/MYC/EIF4EBP1/HBEGF	bom:102280296/bom:102274304/bom:102278368/bom:102283032	4	0		4	ENSBMUG00000018621/ENSBMUG00000008022/ENSBMUG00000006339/ENSBMUG00000014920
bom04972	Pancreatic secretion	4/158	73/6400	0.105506	0.781662	ENSBMUG00000013197/ENSBMUG00000007263/ENSBMUG00000016316/ENSBMUG00000022187	ATP1A4/SLC4A4/ATP1A1/CPA3	bom:102272122/bom:102268544/bom:102287260/bom:102265447	4	2	ENSBMUG00000007263/ENSBMUG00000016316	2	ENSBMUG00000013197/ENSBMUG00000022187
bom05418	Fluid shear stress and atherosclerosis	6/158	132/6400	0.107478	0.781662	ENSBMUG00000018621/ENSBMUG00000022761/ENSBMUG00000005861/ENSBMUG00000012109/ENSBMUG00000014160/ENSBMUG00000013532	P3R3URF/GSTT4/GSTO2/CAV3/HMOX1/CCL2	bom:102280296/bom:102276933/bom:102288026/bom:102272328/bom:102281265/bom:102271913	6	1	ENSBMUG00000014160	5	ENSBMUG00000018621/ENSBMUG00000022761/ENSBMUG00000005861/ENSBMUG00000012109/ENSBMUG00000013532
bom04742	Taste transduction	4/158	75/6400	0.113581	0.801746	novel.1067/novel.208/novel.757/novel.1185	-/-/-/-	bom:102286375/bom:102286375/bom:102286375/bom:102286375	4	2	novel.757/novel.1185	2	novel.1067/novel.208
bom00280	Valine, leucine and isoleucine degradation	3/158	50/6400	0.125213	0.837967	ENSBMUG00000005040/ENSBMUG00000012523/ENSBMUG00000000469	-/-/-	bom:102265076/bom:102286272/bom:102283259	3	0		3	ENSBMUG00000005040/ENSBMUG00000012523/ENSBMUG00000000469
bom00650	Butanoate metabolism	2/158	25/6400	0.125695	0.837967	ENSBMUG00000012523/ENSBMUG00000000469	-/-	bom:102286272/bom:102283259	2	0		2	ENSBMUG00000012523/ENSBMUG00000000469
bom00983	Drug metabolism - other enzymes	3/158	54/6400	0.147911	0.880152	ENSBMUG00000022761/ENSBMUG00000005861/ENSBMUG00000021829	GSTT4/GSTO2/-	bom:102276933/bom:102288026/bom:102269282	3	0		3	ENSBMUG00000022761/ENSBMUG00000005861/ENSBMUG00000021829
bom05213	Endometrial cancer	3/158	54/6400	0.147911	0.880152	ENSBMUG00000018621/ENSBMUG00000008022/ENSBMUG00000018299	P3R3URF/MYC/LEF1	bom:102280296/bom:102274304/bom:102266946	3	0		3	ENSBMUG00000018621/ENSBMUG00000008022/ENSBMUG00000018299
bom01200	Carbon metabolism	5/158	114/6400	0.150511	0.880152	ENSBMUG00000011730/ENSBMUG00000013257/ENSBMUG00000010974/ENSBMUG00000018416/ENSBMUG00000019773	PGK2/PDHA2/FBP1/HK3/OGDHL	bom:102268739/bom:102286090/bom:102285847/bom:102275095/bom:102275241	5	0		5	ENSBMUG00000011730/ENSBMUG00000013257/ENSBMUG00000010974/ENSBMUG00000018416/ENSBMUG00000019773
bom00512	Mucin type O-glycan biosynthesis	2/158	29/6400	0.15984	0.880152	ENSBMUG00000024130/ENSBMUG00000005511	GALNT10/GALNTL5	bom:102272275/bom:102265840	2	1	ENSBMUG00000024130	1	ENSBMUG00000005511
bom04218	Cellular senescence	6/158	149/6400	0.162213	0.880152	ENSBMUG00000018621/ENSBMUG00000006144/ENSBMUG00000008022/ENSBMUG00000006339/ENSBMUG00000018114/ENSBMUG00000013760	P3R3URF/SERPINE1/MYC/EIF4EBP1/FOXM1/CCNA1	bom:102280296/bom:102275884/bom:102274304/bom:102278368/bom:102287371/bom:102276514	6	0		6	ENSBMUG00000018621/ENSBMUG00000006144/ENSBMUG00000008022/ENSBMUG00000006339/ENSBMUG00000018114/ENSBMUG00000013760
bom05225	Hepatocellular carcinoma	6/158	150/6400	0.165757	0.880152	ENSBMUG00000018621/ENSBMUG00000022761/ENSBMUG00000005861/ENSBMUG00000008022/ENSBMUG00000018299/ENSBMUG00000014160	P3R3URF/GSTT4/GSTO2/MYC/LEF1/HMOX1	bom:102280296/bom:102276933/bom:102288026/bom:102274304/bom:102266946/bom:102281265	6	1	ENSBMUG00000014160	5	ENSBMUG00000018621/ENSBMUG00000022761/ENSBMUG00000005861/ENSBMUG00000008022/ENSBMUG00000018299
bom04630	JAK-STAT signaling pathway	5/158	118/6400	0.16642	0.880152	ENSBMUG00000006128/ENSBMUG00000018621/ENSBMUG00000008022/ENSBMUG00000004151/ENSBMUG00000010817	SOCS2/P3R3URF/MYC/FHL1/IL6R	bom:102268022/bom:102280296/bom:102274304/bom:102268388/bom:102287439	5	2	ENSBMUG00000004151/ENSBMUG00000010817	3	ENSBMUG00000006128/ENSBMUG00000018621/ENSBMUG00000008022
bom04710	Circadian rhythm	2/158	30/6400	0.168627	0.880152	ENSBMUG00000016787/ENSBMUG00000024807	PER2/RORC	bom:102272325/bom:102278518	2	0		2	ENSBMUG00000016787/ENSBMUG00000024807
bom05410	Hypertrophic cardiomyopathy (HCM)	4/158	89/6400	0.176949	0.880152	ENSBMUG00000007047/ENSBMUG00000024689/ENSBMUG00000017042/ENSBMUG00000018162	AGT/-/ITGB6/ITGA7	bom:102274045/bom:102273543/bom:102285344/bom:102282217	4	2	ENSBMUG00000007047/ENSBMUG00000018162	2	ENSBMUG00000024689/ENSBMUG00000017042
bom00020	Citrate cycle (TCA cycle)	2/158	31/6400	0.177494	0.880152	ENSBMUG00000013257/ENSBMUG00000019773	PDHA2/OGDHL	bom:102286090/bom:102275241	2	0		2	ENSBMUG00000013257/ENSBMUG00000019773
bom04022	cGMP-PKG signaling pathway	6/158	154/6400	0.18026	0.880152	ENSBMUG00000013197/ENSBMUG00000000391/ENSBMUG00000016316/ENSBMUG00000011295/ENSBMUG00000006546/ENSBMUG00000009284	ATP1A4/MRVI1/ATP1A1/MYLK3/KCNU1/PRKG1	bom:102272122/bom:102278336/bom:102287260/bom:102275601/bom:102279494/bom:102279305	6	2	ENSBMUG00000000391/ENSBMUG00000016316	4	ENSBMUG00000013197/ENSBMUG00000011295/ENSBMUG00000006546/ENSBMUG00000009284
bom00051	Fructose and mannose metabolism	2/158	32/6400	0.186433	0.880152	ENSBMUG00000010974/ENSBMUG00000018416	FBP1/HK3	bom:102285847/bom:102275095	2	0		2	ENSBMUG00000010974/ENSBMUG00000018416
bom05143	African trypanosomiasis	2/158	32/6400	0.186433	0.880152	ENSBMUG00000007932/ENSBMUG00000024501	-/-	bom:102279228/bom:102268919	2	2	ENSBMUG00000007932/ENSBMUG00000024501	0
bom05219	Bladder cancer	2/158	33/6400	0.195434	0.880152	ENSBMUG00000008022/ENSBMUG00000014920	MYC/HBEGF	bom:102274304/bom:102283032	2	0		2	ENSBMUG00000008022/ENSBMUG00000014920
bom04920	Adipocytokine signaling pathway	3/158	63/6400	0.203114	0.880152	ENSBMUG00000022222/ENSBMUG00000015068/ENSBMUG00000006069	ACACB/-/ACSL1	bom:102275206/bom:102276039/bom:102287851	3	2	ENSBMUG00000022222/ENSBMUG00000006069	1	ENSBMUG00000015068
bom05142	Chagas disease (American trypanosomiasis)	4/158	96/6400	0.212333	0.880152	ENSBMUG00000018621/ENSBMUG00000006144/ENSBMUG00000024689/ENSBMUG00000013532	P3R3URF/SERPINE1/-/CCL2	bom:102280296/bom:102275884/bom:102273543/bom:102271913	4	0		4	ENSBMUG00000018621/ENSBMUG00000006144/ENSBMUG00000024689/ENSBMUG00000013532
bom00350	Tyrosine metabolism	2/158	35/6400	0.213589	0.880152	ENSBMUG00000005040/ENSBMUG00000026439	-/FAH	bom:102265076/bom:102278762	2	0		2	ENSBMUG00000005040/ENSBMUG00000026439
bom00830	Retinol metabolism	2/158	35/6400	0.213589	0.880152	ENSBMUG00000000748/ENSBMUG00000023225	CYP26B1/CYP2S1	bom:102272258/bom:102282525	2	1	ENSBMUG00000000748	1	ENSBMUG00000023225
bom05216	Thyroid cancer	2/158	35/6400	0.213589	0.880152	ENSBMUG00000008022/ENSBMUG00000018299	MYC/LEF1	bom:102274304/bom:102266946	2	0		2	ENSBMUG00000008022/ENSBMUG00000018299
bom04144	Endocytosis	8/158	236/6400	0.227426	0.880152	ENSBMUG00000010684/ENSBMUG00000004725/ENSBMUG00000016898/ENSBMUG00000004035/ENSBMUG00000025302/ENSBMUG00000012109/ENSBMUG00000014712/ENSBMUG00000006676	RAB11FIP4/CAPZA3/RAB31/KIF5C/GRK4/CAV3/HSPA1L/ACAP1	bom:102268426/bom:102274017/bom:102274494/bom:102285160/bom:102283303/bom:102272328/bom:102285944/bom:102271115	8	1	ENSBMUG00000016898	7	ENSBMUG00000010684/ENSBMUG00000004725/ENSBMUG00000004035/ENSBMUG00000025302/ENSBMUG00000012109/ENSBMUG00000014712/ENSBMUG00000006676
bom00620	Pyruvate metabolism	2/158	37/6400	0.231897	0.880152	ENSBMUG00000022222/ENSBMUG00000013257	ACACB/PDHA2	bom:102275206/bom:102286090	2	1	ENSBMUG00000022222	1	ENSBMUG00000013257
bom04931	Insulin resistance	4/158	101/6400	0.23873	0.880152	ENSBMUG00000022222/ENSBMUG00000018621/ENSBMUG00000007047/ENSBMUG00000000305	ACACB/P3R3URF/AGT/PRKCD	bom:102275206/bom:102280296/bom:102274045/bom:102273901	4	2	ENSBMUG00000022222/ENSBMUG00000007047	2	ENSBMUG00000018621/ENSBMUG00000000305
bom00982	Drug metabolism - cytochrome P450	2/158	38/6400	0.24109	0.880152	ENSBMUG00000022761/ENSBMUG00000005861	GSTT4/GSTO2	bom:102276933/bom:102288026	2	0		2	ENSBMUG00000022761/ENSBMUG00000005861
bom04520	Adherens junction	3/158	69/6400	0.242215	0.880152	ENSBMUG00000011335/ENSBMUG00000018299/ENSBMUG00000024007	SNAI2/LEF1/SSX2IP	bom:102280193/bom:102266946/bom:102265834	3	0		3	ENSBMUG00000011335/ENSBMUG00000018299/ENSBMUG00000024007
bom04971	Gastric acid secretion	3/158	69/6400	0.242215	0.880152	ENSBMUG00000013197/ENSBMUG00000016316/ENSBMUG00000011295	ATP1A4/ATP1A1/MYLK3	bom:102272122/bom:102287260/bom:102275601	3	1	ENSBMUG00000016316	2	ENSBMUG00000013197/ENSBMUG00000011295
bom05166	Human T-cell leukemia virus 1 infection	7/158	206/6400	0.246391	0.880152	ENSBMUG00000000869/ENSBMUG00000018621/ENSBMUG00000008022/ENSBMUG00000005080/ENSBMUG00000021060/ENSBMUG00000001485/ENSBMUG00000013760	FOSL1/P3R3URF/MYC/ETS2/ANAPC7/MAP3K14/CCNA1	bom:102275510/bom:102280296/bom:102274304/bom:102285960/bom:102280797/bom:102268339/bom:102276514	7	3	ENSBMUG00000005080/ENSBMUG00000021060/ENSBMUG00000001485	4	ENSBMUG00000000869/ENSBMUG00000018621/ENSBMUG00000008022/ENSBMUG00000013760
bom04668	TNF signaling pathway	4/158	103/6400	0.249502	0.880152	ENSBMUG00000018621/ENSBMUG00000006340/ENSBMUG00000001485/ENSBMUG00000013532	P3R3URF/TRAF5/MAP3K14/CCL2	bom:102280296/bom:102266053/bom:102268339/bom:102271913	4	1	ENSBMUG00000001485	3	ENSBMUG00000018621/ENSBMUG00000006340/ENSBMUG00000013532
bom05203	Viral carcinogenesis	6/158	173/6400	0.255246	0.880152	ENSBMUG00000023384/ENSBMUG00000026402/ENSBMUG00000018621/ENSBMUG00000011465/ENSBMUG00000006340/ENSBMUG00000013760	-/HDAC9/P3R3URF/GTF2A1L/TRAF5/CCNA1	bom:102282517/bom:102277833/bom:102280296/bom:102284183/bom:102266053/bom:102276514	6	0		6	ENSBMUG00000023384/ENSBMUG00000026402/ENSBMUG00000018621/ENSBMUG00000011465/ENSBMUG00000006340/ENSBMUG00000013760
bom01521	EGFR tyrosine kinase inhibitor resistance	3/158	71/6400	0.255523	0.880152	ENSBMUG00000018621/ENSBMUG00000006339/ENSBMUG00000010817	P3R3URF/EIF4EBP1/IL6R	bom:102280296/bom:102278368/bom:102287439	3	1	ENSBMUG00000010817	2	ENSBMUG00000018621/ENSBMUG00000006339
bom03320	PPAR signaling pathway	3/158	71/6400	0.255523	0.880152	ENSBMUG00000014717/ENSBMUG00000015068/ENSBMUG00000006069	GK2/-/ACSL1	bom:102265541/bom:102276039/bom:102287851	3	1	ENSBMUG00000006069	2	ENSBMUG00000014717/ENSBMUG00000015068
bom04657	IL-17 signaling pathway	3/158	71/6400	0.255523	0.880152	ENSBMUG00000000869/ENSBMUG00000006340/ENSBMUG00000013532	FOSL1/TRAF5/CCL2	bom:102275510/bom:102266053/bom:102271913	3	0		3	ENSBMUG00000000869/ENSBMUG00000006340/ENSBMUG00000013532
bom04080	Neuroactive ligand-receptor interaction	7/158	209/6400	0.257708	0.880152	ENSBMUG00000025098/ENSBMUG00000007047/ENSBMUG00000004634/ENSBMUG00000008325/ENSBMUG00000005876/ENSBMUG00000011752/ENSBMUG00000009060	-/AGT/MCHR1/HCRTR1/CHRND/PENK/GRIN2B	bom:102281340/bom:102274045/bom:102269279/bom:102283240/bom:102267007/bom:102278573/bom:102273574	7	4	ENSBMUG00000007047/ENSBMUG00000004634/ENSBMUG00000008325/ENSBMUG00000011752	3	ENSBMUG00000025098/ENSBMUG00000005876/ENSBMUG00000009060
bom05164	Influenza A	5/158	139/6400	0.25911	0.880152	novel.1289/ENSBMUG00000022970/ENSBMUG00000018621/ENSBMUG00000023027/ENSBMUG00000013532	-/-/P3R3URF/-/CCL2	bom:102283192/bom:102276310/bom:102280296/bom:102276593/bom:102271913	5	0		5	novel.1289/ENSBMUG00000022970/ENSBMUG00000018621/ENSBMUG00000023027/ENSBMUG00000013532
bom00071	Fatty acid degradation	2/158	40/6400	0.259521	0.880152	ENSBMUG00000015068/ENSBMUG00000006069	-/ACSL1	bom:102276039/bom:102287851	2	1	ENSBMUG00000006069	1	ENSBMUG00000015068
bom04915	Estrogen signaling pathway	4/158	105/6400	0.260378	0.880152	ENSBMUG00000018621/ENSBMUG00000000305/ENSBMUG00000014712/ENSBMUG00000014920	P3R3URF/PRKCD/HSPA1L/HBEGF	bom:102280296/bom:102273901/bom:102285944/bom:102283032	4	0		4	ENSBMUG00000018621/ENSBMUG00000000305/ENSBMUG00000014712/ENSBMUG00000014920
bom00565	Ether lipid metabolism	2/158	41/6400	0.268746	0.889502	ENSBMUG00000014448/ENSBMUG00000024888	-/TMEM86B	bom:102268140/bom:102265175	2	0		2	ENSBMUG00000014448/ENSBMUG00000024888
bom04970	Salivary secretion	3/158	74/6400	0.275669	0.889502	ENSBMUG00000013197/ENSBMUG00000016316/ENSBMUG00000009284	ATP1A4/ATP1A1/PRKG1	bom:102272122/bom:102287260/bom:102279305	3	1	ENSBMUG00000016316	2	ENSBMUG00000013197/ENSBMUG00000009284
bom05100	Bacterial invasion of epithelial cells	3/158	74/6400	0.275669	0.889502	ENSBMUG00000010378/ENSBMUG00000018621/ENSBMUG00000012109	SEPT12/P3R3URF/CAV3	bom:102271755/bom:102280296/bom:102272328	3	0		3	ENSBMUG00000010378/ENSBMUG00000018621/ENSBMUG00000012109
bom04961	Endocrine and other factor-regulated calcium reabsorption	2/158	42/6400	0.277969	0.889502	ENSBMUG00000013197/ENSBMUG00000016316	ATP1A4/ATP1A1	bom:102272122/bom:102287260	2	1	ENSBMUG00000016316	1	ENSBMUG00000013197
bom05412	Arrhythmogenic right ventricular cardiomyopathy (ARVC)	3/158	75/6400	0.282423	0.891862	ENSBMUG00000017042/ENSBMUG00000018299/ENSBMUG00000018162	ITGB6/LEF1/ITGA7	bom:102285344/bom:102266946/bom:102282217	3	1	ENSBMUG00000018162	2	ENSBMUG00000017042/ENSBMUG00000018299
bom00910	Nitrogen metabolism	1/158	14/6400	0.29554	0.906196	ENSBMUG00000024067	CA9	bom:102275051	1	0		1	ENSBMUG00000024067
bom04911	Insulin secretion	3/158	77/6400	0.295973	0.906196	ENSBMUG00000013197/ENSBMUG00000016316/ENSBMUG00000006546	ATP1A4/ATP1A1/KCNU1	bom:102272122/bom:102287260/bom:102279494	3	1	ENSBMUG00000016316	2	ENSBMUG00000013197/ENSBMUG00000006546
bom04919	Thyroid hormone signaling pathway	4/158	112/6400	0.299095	0.906196	ENSBMUG00000013197/ENSBMUG00000018621/ENSBMUG00000016316/ENSBMUG00000008022	ATP1A4/P3R3URF/ATP1A1/MYC	bom:102272122/bom:102280296/bom:102287260/bom:102274304	4	1	ENSBMUG00000016316	3	ENSBMUG00000013197/ENSBMUG00000018621/ENSBMUG00000008022
bom05210	Colorectal cancer	3/158	78/6400	0.302764	0.906196	ENSBMUG00000018621/ENSBMUG00000008022/ENSBMUG00000018299	P3R3URF/MYC/LEF1	bom:102280296/bom:102274304/bom:102266946	3	0		3	ENSBMUG00000018621/ENSBMUG00000008022/ENSBMUG00000018299
bom00480	Glutathione metabolism	2/158	47/6400	0.323883	0.906196	ENSBMUG00000022761/ENSBMUG00000005861	GSTT4/GSTO2	bom:102276933/bom:102288026	2	0		2	ENSBMUG00000022761/ENSBMUG00000005861
bom05204	Chemical carcinogenesis	2/158	47/6400	0.323883	0.906196	ENSBMUG00000022761/ENSBMUG00000005861	GSTT4/GSTO2	bom:102276933/bom:102288026	2	0		2	ENSBMUG00000022761/ENSBMUG00000005861
bom04510	Focal adhesion	6/158	190/6400	0.328342	0.906196	ENSBMUG00000015225/ENSBMUG00000018621/ENSBMUG00000012109/ENSBMUG00000017042/ENSBMUG00000011295/ENSBMUG00000018162	COMP/P3R3URF/CAV3/ITGB6/MYLK3/ITGA7	bom:102267028/bom:102280296/bom:102272328/bom:102285344/bom:102275601/bom:102282217	6	1	ENSBMUG00000018162	5	ENSBMUG00000015225/ENSBMUG00000018621/ENSBMUG00000012109/ENSBMUG00000017042/ENSBMUG00000011295
bom04950	Maturity onset diabetes of the young	1/158	16/6400	0.32997	0.906196	ENSBMUG00000021385	RFX6	bom:102275984	1	0		1	ENSBMUG00000021385
bom04512	ECM-receptor interaction	3/158	82/6400	0.329986	0.906196	ENSBMUG00000015225/ENSBMUG00000017042/ENSBMUG00000018162	COMP/ITGB6/ITGA7	bom:102267028/bom:102285344/bom:102282217	3	1	ENSBMUG00000018162	2	ENSBMUG00000015225/ENSBMUG00000017042
bom04914	Progesterone-mediated oocyte maturation	3/158	82/6400	0.329986	0.906196	ENSBMUG00000018621/ENSBMUG00000021060/ENSBMUG00000013760	P3R3URF/ANAPC7/CCNA1	bom:102280296/bom:102280797/bom:102276514	3	1	ENSBMUG00000021060	2	ENSBMUG00000018621/ENSBMUG00000013760
bom04260	Cardiac muscle contraction	3/158	83/6400	0.336794	0.906196	ENSBMUG00000013197/ENSBMUG00000006764/ENSBMUG00000016316	ATP1A4/COX6B2/ATP1A1	bom:102272122/bom:102286900/bom:102287260	3	1	ENSBMUG00000016316	2	ENSBMUG00000013197/ENSBMUG00000006764
bom00590	Arachidonic acid metabolism	2/158	49/6400	0.342066	0.906196	ENSBMUG00000001227/ENSBMUG00000016915	PTGES/EPHX2	bom:102267091/bom:102267808	2	0		2	ENSBMUG00000001227/ENSBMUG00000016915
bom04923	Regulation of lipolysis in adipocytes	2/158	49/6400	0.342066	0.906196	ENSBMUG00000018621/ENSBMUG00000009284	P3R3URF/PRKG1	bom:102280296/bom:102279305	2	0		2	ENSBMUG00000018621/ENSBMUG00000009284
bom04151	PI3K-Akt signaling pathway	9/158	306/6400	0.34308	0.906196	ENSBMUG00000015225/ENSBMUG00000018621/ENSBMUG00000016032/ENSBMUG00000008022/ENSBMUG00000006339/ENSBMUG00000017042/ENSBMUG00000018162/ENSBMUG00000008417/ENSBMUG00000010817	COMP/P3R3URF/ANGPT4/MYC/EIF4EBP1/ITGB6/ITGA7/SGK1/IL6R	bom:102267028/bom:102280296/bom:102281947/bom:102274304/bom:102278368/bom:102285344/bom:102282217/bom:102272039/bom:102287439	9	2	ENSBMUG00000018162/ENSBMUG00000010817	7	ENSBMUG00000015225/ENSBMUG00000018621/ENSBMUG00000016032/ENSBMUG00000008022/ENSBMUG00000006339/ENSBMUG00000017042/ENSBMUG00000008417
bom04146	Peroxisome	3/158	84/6400	0.343599	0.906196	ENSBMUG00000016915/ENSBMUG00000015068/ENSBMUG00000006069	EPHX2/-/ACSL1	bom:102267808/bom:102276039/bom:102287851	3	1	ENSBMUG00000006069	2	ENSBMUG00000016915/ENSBMUG00000015068
bom05231	Choline metabolism in cancer	3/158	85/6400	0.350399	0.914085	ENSBMUG00000018621/ENSBMUG00000003131/ENSBMUG00000006339	P3R3URF/SLC22A3/EIF4EBP1	bom:102280296/bom:102278905/bom:102278368	3	1	ENSBMUG00000003131	2	ENSBMUG00000018621/ENSBMUG00000006339
bom04650	Natural killer cell mediated cytotoxicity	3/158	86/6400	0.357192	0.921786	ENSBMUG00000018621/ENSBMUG00000013628/ENSBMUG00000012168	P3R3URF/-/-	bom:102280296/bom:102276501/bom:106701451	3	1	ENSBMUG00000012168	2	ENSBMUG00000018621/ENSBMUG00000013628
bom00532	Glycosaminoglycan biosynthesis - chondroitin sulfate / dermatan sulfate	1/158	18/6400	0.362728	0.926114	ENSBMUG00000004486	-	bom:102279883	1	0		1	ENSBMUG00000004486
bom04713	Circadian entrainment	3/158	88/6400	0.370749	0.935115	ENSBMUG00000016787/ENSBMUG00000009060/ENSBMUG00000009284	PER2/GRIN2B/PRKG1	bom:102272325/bom:102273574/bom:102279305	3	0		3	ENSBMUG00000016787/ENSBMUG00000009060/ENSBMUG00000009284
bom05163	Human cytomegalovirus infection	6/158	201/6400	0.377119	0.935115	ENSBMUG00000018621/ENSBMUG00000008022/ENSBMUG00000006339/ENSBMUG00000006340/ENSBMUG00000010817/ENSBMUG00000013532	P3R3URF/MYC/EIF4EBP1/TRAF5/IL6R/CCL2	bom:102280296/bom:102274304/bom:102278368/bom:102266053/bom:102287439/bom:102271913	6	1	ENSBMUG00000010817	5	ENSBMUG00000018621/ENSBMUG00000008022/ENSBMUG00000006339/ENSBMUG00000006340/ENSBMUG00000013532
bom04213	Longevity regulating pathway - multiple species	2/158	53/6400	0.377942	0.935115	ENSBMUG00000018621/ENSBMUG00000014712	P3R3URF/HSPA1L	bom:102280296/bom:102285944	2	0		2	ENSBMUG00000018621/ENSBMUG00000014712
bom05222	Small cell lung cancer	3/158	90/6400	0.384256	0.935759	ENSBMUG00000018621/ENSBMUG00000008022/ENSBMUG00000006340	P3R3URF/MYC/TRAF5	bom:102280296/bom:102274304/bom:102266053	3	0		3	ENSBMUG00000018621/ENSBMUG00000008022/ENSBMUG00000006340
bom04977	Vitamin digestion and absorption	1/158	20/6400	0.393894	0.935759	ENSBMUG00000001801	CBLIF	bom:102268190	1	0		1	ENSBMUG00000001801
bom05226	Gastric cancer	4/158	129/6400	0.394939	0.935759	ENSBMUG00000018621/ENSBMUG00000008022/ENSBMUG00000018299/ENSBMUG00000001883	P3R3URF/MYC/LEF1/CDH17	bom:102280296/bom:102274304/bom:102266946/bom:102282829	4	1	ENSBMUG00000001883	3	ENSBMUG00000018621/ENSBMUG00000008022/ENSBMUG00000018299
bom04064	NF-kappa B signaling pathway	3/158	92/6400	0.397698	0.935759	ENSBMUG00000006340/ENSBMUG00000001485/ENSBMUG00000018298	TRAF5/MAP3K14/CCL21	bom:102266053/bom:102268339/bom:102279199	3	1	ENSBMUG00000001485	2	ENSBMUG00000006340/ENSBMUG00000018298
bom04925	Aldosterone synthesis and secretion	3/158	92/6400	0.397698	0.935759	ENSBMUG00000013197/ENSBMUG00000007047/ENSBMUG00000016316	ATP1A4/AGT/ATP1A1	bom:102272122/bom:102274045/bom:102287260	3	2	ENSBMUG00000007047/ENSBMUG00000016316	1	ENSBMUG00000013197
bom04060	Cytokine-cytokine receptor interaction	6/158	210/6400	0.417213	0.94121	ENSBMUG00000018298/ENSBMUG00000010817/ENSBMUG00000013512/ENSBMUG00000013532/ENSBMUG00000013488/ENSBMUG00000007774	CCL21/IL6R/-/CCL2/-/CCL24	bom:102279199/bom:102287439/bom:102270698/bom:102271913/bom:106701034/bom:102284034	6	1	ENSBMUG00000010817	5	ENSBMUG00000018298/ENSBMUG00000013512/ENSBMUG00000013532/ENSBMUG00000013488/ENSBMUG00000007774
bom04625	C-type lectin receptor signaling pathway	3/158	95/6400	0.417711	0.94121	ENSBMUG00000018621/ENSBMUG00000000305/ENSBMUG00000001485	P3R3URF/PRKCD/MAP3K14	bom:102280296/bom:102273901/bom:102268339	3	1	ENSBMUG00000001485	2	ENSBMUG00000018621/ENSBMUG00000000305
bom05414	Dilated cardiomyopathy (DCM)	3/158	95/6400	0.417711	0.94121	ENSBMUG00000007047/ENSBMUG00000017042/ENSBMUG00000018162	AGT/ITGB6/ITGA7	bom:102274045/bom:102285344/bom:102282217	3	2	ENSBMUG00000007047/ENSBMUG00000018162	1	ENSBMUG00000017042
bom01212	Fatty acid metabolism	2/158	58/6400	0.421606	0.94121	ENSBMUG00000015068/ENSBMUG00000006069	-/ACSL1	bom:102276039/bom:102287851	2	1	ENSBMUG00000006069	1	ENSBMUG00000015068
bom04921	Oxytocin signaling pathway	4/158	134/6400	0.422968	0.94121	ENSBMUG00000017192/novel.855/ENSBMUG00000011295/ENSBMUG00000008641	MYL6B/-/MYLK3/EEF2K	bom:102275160/bom:106701273/bom:102275601/bom:102283488	4	2	novel.855/ENSBMUG00000008641	2	ENSBMUG00000017192/ENSBMUG00000011295
bom00531	Glycosaminoglycan degradation	1/158	22/6400	0.423545	0.94121	ENSBMUG00000013756	ARSB	bom:102279001	1	1	ENSBMUG00000013756	0
bom04917	Prolactin signaling pathway	2/158	59/6400	0.430155	0.94713	ENSBMUG00000006128/ENSBMUG00000018621	SOCS2/P3R3URF	bom:102268022/bom:102280296	2	0		2	ENSBMUG00000006128/ENSBMUG00000018621
bom04922	Glucagon signaling pathway	3/158	98/6400	0.437509	0.954565	ENSBMUG00000022222/ENSBMUG00000013257/ENSBMUG00000010974	ACACB/PDHA2/FBP1	bom:102275206/bom:102286090/bom:102285847	3	1	ENSBMUG00000022222	2	ENSBMUG00000013257/ENSBMUG00000010974
bom00310	Lysine degradation	2/158	61/6400	0.447051	0.959255	ENSBMUG00000021283/ENSBMUG00000024538	EZH2/AASS	bom:102287858/bom:102275417	2	0		2	ENSBMUG00000021283/ENSBMUG00000024538
bom04150	mTOR signaling pathway	4/158	139/6400	0.450685	0.959255	ENSBMUG00000018621/ENSBMUG00000023664/ENSBMUG00000006339/ENSBMUG00000008417	P3R3URF/SLC3A2/EIF4EBP1/SGK1	bom:102280296/bom:102275454/bom:102278368/bom:102272039	4	1	ENSBMUG00000023664	3	ENSBMUG00000018621/ENSBMUG00000006339/ENSBMUG00000008417
bom05033	Nicotine addiction	1/158	24/6400	0.451754	0.959255	ENSBMUG00000009060	GRIN2B	bom:102273574	1	0		1	ENSBMUG00000009060
bom04390	Hippo signaling pathway	4/158	141/6400	0.461659	0.959255	ENSBMUG00000011335/ENSBMUG00000006144/ENSBMUG00000008022/ENSBMUG00000018299	SNAI2/SERPINE1/MYC/LEF1	bom:102280193/bom:102275884/bom:102274304/bom:102266946	4	0		4	ENSBMUG00000011335/ENSBMUG00000006144/ENSBMUG00000008022/ENSBMUG00000018299
bom00860	Porphyrin and chlorophyll metabolism	1/158	26/6400	0.478591	0.959255	ENSBMUG00000014160	HMOX1	bom:102281265	1	1	ENSBMUG00000014160	0
bom04024	cAMP signaling pathway	5/158	184/6400	0.478667	0.959255	ENSBMUG00000013197/ENSBMUG00000018621/ENSBMUG00000016316/ENSBMUG00000001368/ENSBMUG00000009060	ATP1A4/P3R3URF/ATP1A1/-/GRIN2B	bom:102272122/bom:102280296/bom:102287260/bom:102270437/bom:102273574	5	1	ENSBMUG00000016316	4	ENSBMUG00000013197/ENSBMUG00000018621/ENSBMUG00000001368/ENSBMUG00000009060
bom04924	Renin secretion	2/158	66/6400	0.488034	0.959255	ENSBMUG00000007047/ENSBMUG00000024689	AGT/-	bom:102274045/bom:102273543	2	1	ENSBMUG00000007047	1	ENSBMUG00000024689
bom00030	Pentose phosphate pathway	1/158	27/6400	0.491515	0.959255	ENSBMUG00000010974	FBP1	bom:102285847	1	0		1	ENSBMUG00000010974
bom00500	Starch and sucrose metabolism	1/158	27/6400	0.491515	0.959255	ENSBMUG00000018416	HK3	bom:102275095	1	0		1	ENSBMUG00000018416
bom05169	Epstein-Barr virus infection	5/158	187/6400	0.492973	0.959255	ENSBMUG00000018621/ENSBMUG00000008022/ENSBMUG00000006340/ENSBMUG00000001485/ENSBMUG00000013760	P3R3URF/MYC/TRAF5/MAP3K14/CCNA1	bom:102280296/bom:102274304/bom:102266053/bom:102268339/bom:102276514	5	1	ENSBMUG00000001485	4	ENSBMUG00000018621/ENSBMUG00000008022/ENSBMUG00000006340/ENSBMUG00000013760
bom04380	Osteoclast differentiation	3/158	107/6400	0.495257	0.959255	ENSBMUG00000000869/ENSBMUG00000018621/ENSBMUG00000001485	FOSL1/P3R3URF/MAP3K14	bom:102275510/bom:102280296/bom:102268339	3	1	ENSBMUG00000001485	2	ENSBMUG00000000869/ENSBMUG00000018621
bom04918	Thyroid hormone synthesis	2/158	67/6400	0.496003	0.959255	ENSBMUG00000013197/ENSBMUG00000016316	ATP1A4/ATP1A1	bom:102272122/bom:102287260	2	1	ENSBMUG00000016316	1	ENSBMUG00000013197
bom05220	Chronic myeloid leukemia	2/158	67/6400	0.496003	0.959255	ENSBMUG00000018621/ENSBMUG00000008022	P3R3URF/MYC	bom:102280296/bom:102274304	2	0		2	ENSBMUG00000018621/ENSBMUG00000008022
bom00052	Galactose metabolism	1/158	28/6400	0.504122	0.959255	ENSBMUG00000018416	HK3	bom:102275095	1	0		1	ENSBMUG00000018416
bom05206	MicroRNAs in cancer	4/158	151/6400	0.515292	0.959255	ENSBMUG00000018621/ENSBMUG00000008022/ENSBMUG00000014160/ENSBMUG00000021283	P3R3URF/MYC/HMOX1/EZH2	bom:102280296/bom:102274304/bom:102281265/bom:102287858	4	1	ENSBMUG00000014160	3	ENSBMUG00000018621/ENSBMUG00000008022/ENSBMUG00000021283
bom04611	Platelet activation	3/158	111/6400	0.51998	0.959255	ENSBMUG00000018621/ENSBMUG00000011295/ENSBMUG00000009284	P3R3URF/MYLK3/PRKG1	bom:102280296/bom:102275601/bom:102279305	3	0		3	ENSBMUG00000018621/ENSBMUG00000011295/ENSBMUG00000009284
bom00250	Alanine, aspartate and glutamate metabolism	1/158	31/6400	0.540108	0.959255	ENSBMUG00000005040	-	bom:102265076	1	0		1	ENSBMUG00000005040
bom01230	Biosynthesis of amino acids	2/158	73/6400	0.542139	0.959255	ENSBMUG00000011730/ENSBMUG00000009991	PGK2/PAH	bom:102268739/bom:102273628	2	0		2	ENSBMUG00000011730/ENSBMUG00000009991
bom04722	Neurotrophin signaling pathway	3/158	115/6400	0.544043	0.959255	ENSBMUG00000018621/ENSBMUG00000000305/ENSBMUG00000002904	P3R3URF/PRKCD/-	bom:102280296/bom:102273901/bom:102266155	3	1	ENSBMUG00000002904	2	ENSBMUG00000018621/ENSBMUG00000000305
bom04068	FoxO signaling pathway	3/158	116/6400	0.54995	0.959255	ENSBMUG00000018621/ENSBMUG00000010382/ENSBMUG00000008417	P3R3URF/FBXO32/SGK1	bom:102280296/bom:102273878/bom:102272039	3	1	ENSBMUG00000010382	2	ENSBMUG00000018621/ENSBMUG00000008417
bom00640	Propanoate metabolism	1/158	32/6400	0.551516	0.959255	ENSBMUG00000022222	ACACB	bom:102275206	1	1	ENSBMUG00000022222	0
bom05202	Transcriptional misregulation in cancer	4/158	159/6400	0.556392	0.959255	ENSBMUG00000010258/ENSBMUG00000016787/ENSBMUG00000008022/ENSBMUG00000002998	-/PER2/MYC/TLX1	bom:102286562/bom:102272325/bom:102274304/bom:102266122	4	1	ENSBMUG00000002998	3	ENSBMUG00000010258/ENSBMUG00000016787/ENSBMUG00000008022
bom04014	Ras signaling pathway	5/158	204/6400	0.570998	0.959255	ENSBMUG00000018621/ENSBMUG00000016032/ENSBMUG00000005080/ENSBMUG00000011972/ENSBMUG00000009060	P3R3URF/ANGPT4/ETS2/RASAL3/GRIN2B	bom:102280296/bom:102281947/bom:102285960/bom:102269674/bom:102273574	5	1	ENSBMUG00000005080	4	ENSBMUG00000018621/ENSBMUG00000016032/ENSBMUG00000011972/ENSBMUG00000009060
bom00230	Purine metabolism	3/158	121/6400	0.578805	0.959255	ENSBMUG00000021193/ENSBMUG00000005486/ENSBMUG00000003890	ALLC/-/AK8	bom:102264635/bom:102273896/bom:102280423	3	0		3	ENSBMUG00000021193/ENSBMUG00000005486/ENSBMUG00000003890
bom04110	Cell cycle	3/158	121/6400	0.578805	0.959255	ENSBMUG00000008022/ENSBMUG00000021060/ENSBMUG00000013760	MYC/ANAPC7/CCNA1	bom:102274304/bom:102280797/bom:102276514	3	1	ENSBMUG00000021060	2	ENSBMUG00000008022/ENSBMUG00000013760
bom04210	Apoptosis	3/158	123/6400	0.590021	0.959255	ENSBMUG00000018621/ENSBMUG00000020847/ENSBMUG00000001485	P3R3URF/CTSF/MAP3K14	bom:102280296/bom:102282298/bom:102268339	3	1	ENSBMUG00000001485	2	ENSBMUG00000018621/ENSBMUG00000020847
bom00760	Nicotinate and nicotinamide metabolism	1/158	37/6400	0.604477	0.959255	ENSBMUG00000005486	-	bom:102273896	1	0		1	ENSBMUG00000005486
bom04211	Longevity regulating pathway	2/158	82/6400	0.605719	0.959255	ENSBMUG00000018621/ENSBMUG00000006339	P3R3URF/EIF4EBP1	bom:102280296/bom:102278368	2	0		2	ENSBMUG00000018621/ENSBMUG00000006339
bom05224	Breast cancer	3/158	126/6400	0.606485	0.959255	ENSBMUG00000018621/ENSBMUG00000008022/ENSBMUG00000018299	P3R3URF/MYC/LEF1	bom:102280296/bom:102274304/bom:102266946	3	0		3	ENSBMUG00000018621/ENSBMUG00000008022/ENSBMUG00000018299
bom04912	GnRH signaling pathway	2/158	84/6400	0.618915	0.959255	ENSBMUG00000000305/ENSBMUG00000014920	PRKCD/HBEGF	bom:102273901/bom:102283032	2	0		2	ENSBMUG00000000305/ENSBMUG00000014920
bom04714	Thermogenesis	5/158	216/6400	0.622213	0.959255	ENSBMUG00000006764/ENSBMUG00000017345/ENSBMUG00000009284/ENSBMUG00000015068/ENSBMUG00000006069	COX6B2/COA7/PRKG1/-/ACSL1	bom:102286900/bom:102279269/bom:102279305/bom:102276039/bom:102287851	5	2	ENSBMUG00000017345/ENSBMUG00000006069	3	ENSBMUG00000006764/ENSBMUG00000009284/ENSBMUG00000015068
bom03040	Spliceosome	3/158	129/6400	0.62251	0.959255	ENSBMUG00000014712/ENSBMUG00000013243/ENSBMUG00000013735	HSPA1L/SRSF5/SF3A2	bom:102285944/bom:102266791/bom:102268103	3	1	ENSBMUG00000013735	2	ENSBMUG00000014712/ENSBMUG00000013243
bom00380	Tryptophan metabolism	1/158	39/6400	0.623877	0.959255	ENSBMUG00000005040	-	bom:102265076	1	0		1	ENSBMUG00000005040
bom03022	Basal transcription factors	1/158	39/6400	0.623877	0.959255	ENSBMUG00000011465	GTF2A1L	bom:102284183	1	0		1	ENSBMUG00000011465
bom05030	Cocaine addiction	1/158	39/6400	0.623877	0.959255	ENSBMUG00000009060	GRIN2B	bom:102273574	1	0		1	ENSBMUG00000009060
bom01522	Endocrine resistance	2/158	85/6400	0.625385	0.959255	ENSBMUG00000018621/ENSBMUG00000014920	P3R3URF/HBEGF	bom:102280296/bom:102283032	2	0		2	ENSBMUG00000018621/ENSBMUG00000014920
bom04672	Intestinal immune network for IgA production	1/158	40/6400	0.63322	0.959255	ENSBMUG00000001485	MAP3K14	bom:102268339	1	1	ENSBMUG00000001485	0
bom04217	Necroptosis	3/158	133/6400	0.643182	0.959255	ENSBMUG00000010530/ENSBMUG00000021271/ENSBMUG00000006340	-/-/TRAF5	bom:102270543/bom:102264563/bom:102266053	3	0		3	ENSBMUG00000010530/ENSBMUG00000021271/ENSBMUG00000006340
bom04666	Fc gamma R-mediated phagocytosis	2/158	88/6400	0.644288	0.959255	ENSBMUG00000018621/ENSBMUG00000000305	P3R3URF/PRKCD	bom:102280296/bom:102273901	2	0		2	ENSBMUG00000018621/ENSBMUG00000000305
bom05215	Prostate cancer	2/158	88/6400	0.644288	0.959255	ENSBMUG00000018621/ENSBMUG00000018299	P3R3URF/LEF1	bom:102280296/bom:102266946	2	0		2	ENSBMUG00000018621/ENSBMUG00000018299
bom00564	Glycerophospholipid metabolism	2/158	89/6400	0.650421	0.959255	ENSBMUG00000002927/ENSBMUG00000014448	LCAT/-	bom:102264672/bom:102268140	2	1	ENSBMUG00000002927	1	ENSBMUG00000014448
bom00260	Glycine, serine and threonine metabolism	1/158	42/6400	0.651218	0.959255	ENSBMUG00000000227	GATM	bom:102274253	1	0		1	ENSBMUG00000000227
bom04979	Cholesterol metabolism	1/158	42/6400	0.651218	0.959255	ENSBMUG00000002927	LCAT	bom:102264672	1	1	ENSBMUG00000002927	0
bom05016	Huntington disease	4/158	180/6400	0.654748	0.959255	ENSBMUG00000025761/ENSBMUG00000006764/ENSBMUG00000007850/ENSBMUG00000009060	DNAI2/COX6B2/DNAH1/GRIN2B	bom:102266910/bom:102286900/bom:102272577/bom:102273574	4	0		4	ENSBMUG00000025761/ENSBMUG00000006764/ENSBMUG00000007850/ENSBMUG00000009060
bom04621	NOD-like receptor signaling pathway	3/158	137/6400	0.663053	0.959255	ENSBMUG00000000305/ENSBMUG00000006340/ENSBMUG00000013532	PRKCD/TRAF5/CCL2	bom:102273901/bom:102266053/bom:102271913	3	0		3	ENSBMUG00000000305/ENSBMUG00000006340/ENSBMUG00000013532
bom04660	T cell receptor signaling pathway	2/158	92/6400	0.668319	0.959255	ENSBMUG00000018621/ENSBMUG00000001485	P3R3URF/MAP3K14	bom:102280296/bom:102268339	2	1	ENSBMUG00000001485	1	ENSBMUG00000018621
bom00330	Arginine and proline metabolism	1/158	44/6400	0.668339	0.959255	ENSBMUG00000000227	GATM	bom:102274253	1	0		1	ENSBMUG00000000227
bom05014	Amyotrophic lateral sclerosis (ALS)	1/158	44/6400	0.668339	0.959255	ENSBMUG00000009060	GRIN2B	bom:102273574	1	0		1	ENSBMUG00000009060
bom00520	Amino sugar and nucleotide sugar metabolism	1/158	45/6400	0.676584	0.959255	ENSBMUG00000018416	HK3	bom:102275095	1	0		1	ENSBMUG00000018416
bom04261	Adrenergic signaling in cardiomyocytes	3/158	140/6400	0.677427	0.959255	ENSBMUG00000013197/ENSBMUG00000007047/ENSBMUG00000016316	ATP1A4/AGT/ATP1A1	bom:102272122/bom:102274045/bom:102287260	3	2	ENSBMUG00000007047/ENSBMUG00000016316	1	ENSBMUG00000013197
bom04310	Wnt signaling pathway	3/158	141/6400	0.682118	0.959255	ENSBMUG00000000869/ENSBMUG00000008022/ENSBMUG00000018299	FOSL1/MYC/LEF1	bom:102275510/bom:102274304/bom:102266946	3	0		3	ENSBMUG00000000869/ENSBMUG00000008022/ENSBMUG00000018299
bom04810	Regulation of actin cytoskeleton	4/158	187/6400	0.684129	0.959255	ENSBMUG00000018621/ENSBMUG00000017042/ENSBMUG00000011295/ENSBMUG00000018162	P3R3URF/ITGB6/MYLK3/ITGA7	bom:102280296/bom:102285344/bom:102275601/bom:102282217	4	1	ENSBMUG00000018162	3	ENSBMUG00000018621/ENSBMUG00000017042/ENSBMUG00000011295
bom04750	Inflammatory mediator regulation of TRP channels	2/158	95/6400	0.685476	0.959255	ENSBMUG00000018621/ENSBMUG00000000305	P3R3URF/PRKCD	bom:102280296/bom:102273901	2	0		2	ENSBMUG00000018621/ENSBMUG00000000305
bom05205	Proteoglycans in cancer	4/158	188/6400	0.688182	0.959255	ENSBMUG00000018621/ENSBMUG00000012109/ENSBMUG00000008022/ENSBMUG00000014920	P3R3URF/CAV3/MYC/HBEGF	bom:102280296/bom:102272328/bom:102274304/bom:102283032	4	0		4	ENSBMUG00000018621/ENSBMUG00000012109/ENSBMUG00000008022/ENSBMUG00000014920
bom04932	Non-alcoholic fatty liver disease (NAFLD)	3/158	143/6400	0.691348	0.959255	ENSBMUG00000018621/ENSBMUG00000006764/ENSBMUG00000010817	P3R3URF/COX6B2/IL6R	bom:102280296/bom:102286900/bom:102287439	3	1	ENSBMUG00000010817	2	ENSBMUG00000018621/ENSBMUG00000006764
bom05161	Hepatitis B	3/158	143/6400	0.691348	0.959255	ENSBMUG00000018621/ENSBMUG00000008022/ENSBMUG00000013760	P3R3URF/MYC/CCNA1	bom:102280296/bom:102274304/bom:102276514	3	0		3	ENSBMUG00000018621/ENSBMUG00000008022/ENSBMUG00000013760
bom00270	Cysteine and methionine metabolism	1/158	47/6400	0.692467	0.959255	ENSBMUG00000005040	-	bom:102265076	1	0		1	ENSBMUG00000005040
bom02010	ABC transporters	1/158	47/6400	0.692467	0.959255	novel.7	-	bom:102273949	1	0		1	novel.7
bom04659	Th17 cell differentiation	2/158	97/6400	0.696508	0.959255	ENSBMUG00000024807/ENSBMUG00000010817	RORC/IL6R	bom:102278518/bom:102287439	2	1	ENSBMUG00000010817	1	ENSBMUG00000024807
bom00240	Pyrimidine metabolism	1/158	49/6400	0.707574	0.959255	ENSBMUG00000005486	-	bom:102273896	1	0		1	ENSBMUG00000005486
bom05150	Staphylococcus aureus infection	1/158	50/6400	0.714849	0.959255	ENSBMUG00000006530	-	bom:102267775	1	0		1	ENSBMUG00000006530
bom04530	Tight junction	3/158	149/6400	0.717837	0.959255	ENSBMUG00000017192/ENSBMUG00000017263/ENSBMUG00000016379	MYL6B/-/MYH3	bom:102275160/bom:102284556/bom:102283722	3	0		3	ENSBMUG00000017192/ENSBMUG00000017263/ENSBMUG00000016379
bom04370	VEGF signaling pathway	1/158	51/6400	0.721944	0.959255	ENSBMUG00000018621	P3R3URF	bom:102280296	1	0		1	ENSBMUG00000018621
bom04730	Long-term depression	1/158	51/6400	0.721944	0.959255	ENSBMUG00000009284	PRKG1	bom:102279305	1	0		1	ENSBMUG00000009284
bom04141	Protein processing in endoplasmic reticulum	3/158	153/6400	0.734506	0.959255	ENSBMUG00000014712/ENSBMUG00000008664/ENSBMUG00000022481	HSPA1L/DNAJC5G/HSPA4L	bom:102285944/bom:102272090/bom:102287645	3	0		3	ENSBMUG00000014712/ENSBMUG00000008664/ENSBMUG00000022481
bom05134	Legionellosis	1/158	53/6400	0.735613	0.959255	ENSBMUG00000014712	HSPA1L	bom:102285944	1	0		1	ENSBMUG00000014712
bom04664	Fc epsilon RI signaling pathway	1/158	54/6400	0.742194	0.959255	ENSBMUG00000018621	P3R3URF	bom:102280296	1	0		1	ENSBMUG00000018621
bom05321	Inflammatory bowel disease (IBD)	1/158	55/6400	0.748613	0.959255	ENSBMUG00000024807	RORC	bom:102278518	1	0		1	ENSBMUG00000024807
bom00561	Glycerolipid metabolism	1/158	56/6400	0.754873	0.959255	ENSBMUG00000014717	GK2	bom:102265541	1	0		1	ENSBMUG00000014717
bom04114	Oocyte meiosis	2/158	111/6400	0.765066	0.959255	ENSBMUG00000023966/ENSBMUG00000021060	STAG3/ANAPC7	bom:102269152/bom:102280797	2	1	ENSBMUG00000021060	1	ENSBMUG00000023966
bom05135	Yersinia infection	2/158	111/6400	0.765066	0.959255	ENSBMUG00000018621/ENSBMUG00000013532	P3R3URF/CCL2	bom:102280296/bom:102271913	2	0		2	ENSBMUG00000018621/ENSBMUG00000013532
bom05165	Human papillomavirus infection	6/158	303/6400	0.766402	0.959255	ENSBMUG00000015225/ENSBMUG00000018621/ENSBMUG00000006339/ENSBMUG00000017042/ENSBMUG00000018162/ENSBMUG00000013760	COMP/P3R3URF/EIF4EBP1/ITGB6/ITGA7/CCNA1	bom:102267028/bom:102280296/bom:102278368/bom:102285344/bom:102282217/bom:102276514	6	1	ENSBMUG00000018162	5	ENSBMUG00000015225/ENSBMUG00000018621/ENSBMUG00000006339/ENSBMUG00000017042/ENSBMUG00000013760
bom05031	Amphetamine addiction	1/158	58/6400	0.766932	0.959255	ENSBMUG00000009060	GRIN2B	bom:102273574	1	0		1	ENSBMUG00000009060
bom05218	Melanoma	1/158	58/6400	0.766932	0.959255	ENSBMUG00000018621	P3R3URF	bom:102280296	1	0		1	ENSBMUG00000018621
bom04927	Cortisol synthesis and secretion	1/158	59/6400	0.772738	0.959255	ENSBMUG00000007047	AGT	bom:102274045	1	1	ENSBMUG00000007047	0
bom05223	Non-small cell lung cancer	1/158	59/6400	0.772738	0.959255	ENSBMUG00000018621	P3R3URF	bom:102280296	1	0		1	ENSBMUG00000018621
bom04728	Dopaminergic synapse	2/158	113/6400	0.773687	0.959255	ENSBMUG00000004035/ENSBMUG00000009060	KIF5C/GRIN2B	bom:102285160/bom:102273574	2	0		2	ENSBMUG00000004035/ENSBMUG00000009060
bom04720	Long-term potentiation	1/158	60/6400	0.778401	0.959255	ENSBMUG00000009060	GRIN2B	bom:102273574	1	0		1	ENSBMUG00000009060
bom04010	MAPK signaling pathway	5/158	262/6400	0.782026	0.959255	ENSBMUG00000016032/ENSBMUG00000008022/ENSBMUG00000014712/ENSBMUG00000000796/ENSBMUG00000001485	ANGPT4/MYC/HSPA1L/MAP3K20/MAP3K14	bom:102281947/bom:102274304/bom:102285944/bom:102288137/bom:102268339	5	1	ENSBMUG00000001485	4	ENSBMUG00000016032/ENSBMUG00000008022/ENSBMUG00000014712/ENSBMUG00000000796
bom04550	Signaling pathways regulating pluripotency of stem cells	2/158	115/6400	0.782033	0.959255	ENSBMUG00000018621/ENSBMUG00000008022	P3R3URF/MYC	bom:102280296/bom:102274304	2	0		2	ENSBMUG00000018621/ENSBMUG00000008022
bom05217	Basal cell carcinoma	1/158	61/6400	0.783923	0.959255	ENSBMUG00000018299	LEF1	bom:102266946	1	0		1	ENSBMUG00000018299
bom04140	Autophagy - animal	2/158	116/6400	0.786105	0.959255	ENSBMUG00000018621/ENSBMUG00000000305	P3R3URF/PRKCD	bom:102280296/bom:102273901	2	0		2	ENSBMUG00000018621/ENSBMUG00000000305
bom04926	Relaxin signaling pathway	2/158	116/6400	0.786105	0.959255	ENSBMUG00000025098/ENSBMUG00000018621	-/P3R3URF	bom:102281340/bom:102280296	2	0		2	ENSBMUG00000025098/ENSBMUG00000018621
bom05162	Measles	2/158	116/6400	0.786105	0.959255	ENSBMUG00000018621/ENSBMUG00000014712	P3R3URF/HSPA1L	bom:102280296/bom:102285944	2	0		2	ENSBMUG00000018621/ENSBMUG00000014712
bom04612	Antigen processing and presentation	1/158	62/6400	0.789309	0.959255	ENSBMUG00000014712	HSPA1L	bom:102285944	1	0		1	ENSBMUG00000014712
bom04721	Synaptic vesicle cycle	1/158	62/6400	0.789309	0.959255	ENSBMUG00000007666	SLC6A1	bom:102272749	1	0		1	ENSBMUG00000007666
bom04142	Lysosome	2/158	117/6400	0.79011	0.959255	ENSBMUG00000020847/ENSBMUG00000013756	CTSF/ARSB	bom:102282298/bom:102279001	2	1	ENSBMUG00000013756	1	ENSBMUG00000020847
bom04740	Olfactory transduction	1/158	64/6400	0.799684	0.959255	ENSBMUG00000009284	PRKG1	bom:102279305	1	0		1	ENSBMUG00000009284
bom05211	Renal cell carcinoma	1/158	64/6400	0.799684	0.959255	ENSBMUG00000018621	P3R3URF	bom:102280296	1	0		1	ENSBMUG00000018621
bom04662	B cell receptor signaling pathway	1/158	66/6400	0.80955	0.959255	ENSBMUG00000018621	P3R3URF	bom:102280296	1	0		1	ENSBMUG00000018621
bom05212	Pancreatic cancer	1/158	67/6400	0.814301	0.959255	ENSBMUG00000018621	P3R3URF	bom:102280296	1	0		1	ENSBMUG00000018621
bom05160	Hepatitis C	2/158	124/6400	0.816348	0.959255	ENSBMUG00000018621/ENSBMUG00000008022	P3R3URF/MYC	bom:102280296/bom:102274304	2	0		2	ENSBMUG00000018621/ENSBMUG00000008022
bom05214	Glioma	1/158	68/6400	0.818934	0.959255	ENSBMUG00000018621	P3R3URF	bom:102280296	1	0		1	ENSBMUG00000018621
bom04072	Phospholipase D signaling pathway	2/158	125/6400	0.819849	0.959255	ENSBMUG00000018621/ENSBMUG00000007047	P3R3URF/AGT	bom:102280296/bom:102274045	2	1	ENSBMUG00000007047	1	ENSBMUG00000018621
bom04115	p53 signaling pathway	1/158	71/6400	0.832155	0.959255	ENSBMUG00000006144	SERPINE1	bom:102275884	1	0		1	ENSBMUG00000006144
bom04540	Gap junction	1/158	72/6400	0.836345	0.959255	ENSBMUG00000009284	PRKG1	bom:102279305	1	0		1	ENSBMUG00000009284
bom05200	Pathways in cancer	9/158	474/6400	0.83793	0.959255	ENSBMUG00000018621/ENSBMUG00000022761/ENSBMUG00000007047/ENSBMUG00000005861/ENSBMUG00000008022/ENSBMUG00000018299/ENSBMUG00000014160/ENSBMUG00000006340/ENSBMUG00000010817	P3R3URF/GSTT4/AGT/GSTO2/MYC/LEF1/HMOX1/TRAF5/IL6R	bom:102280296/bom:102276933/bom:102274045/bom:102288026/bom:102274304/bom:102266946/bom:102281265/bom:102266053/bom:102287439	9	3	ENSBMUG00000007047/ENSBMUG00000014160/ENSBMUG00000010817	6	ENSBMUG00000018621/ENSBMUG00000022761/ENSBMUG00000005861/ENSBMUG00000008022/ENSBMUG00000018299/ENSBMUG00000006340
bom04371	Apelin signaling pathway	2/158	131/6400	0.839631	0.959255	ENSBMUG00000006144/ENSBMUG00000011295	SERPINE1/MYLK3	bom:102275884/bom:102275601	2	0		2	ENSBMUG00000006144/ENSBMUG00000011295
bom04727	GABAergic synapse	1/158	77/6400	0.855787	0.959255	ENSBMUG00000007666	SLC6A1	bom:102272749	1	0		1	ENSBMUG00000007666
bom04015	Rap1 signaling pathway	3/158	191/6400	0.856624	0.959255	ENSBMUG00000018621/ENSBMUG00000016032/ENSBMUG00000009060	P3R3URF/ANGPT4/GRIN2B	bom:102280296/bom:102281947/bom:102273574	3	0		3	ENSBMUG00000018621/ENSBMUG00000016032/ENSBMUG00000009060
bom05032	Morphine addiction	1/158	78/6400	0.85939	0.959255	ENSBMUG00000025302	GRK4	bom:102283303	1	0		1	ENSBMUG00000025302
bom05323	Rheumatoid arthritis	1/158	79/6400	0.862905	0.959255	ENSBMUG00000013532	CCL2	bom:102271913	1	0		1	ENSBMUG00000013532
bom04350	TGF-beta signaling pathway	1/158	80/6400	0.866331	0.959255	ENSBMUG00000008022	MYC	bom:102274304	1	0		1	ENSBMUG00000008022
bom04934	Cushing syndrome	2/158	141/6400	0.868294	0.959255	ENSBMUG00000007047/ENSBMUG00000018299	AGT/LEF1	bom:102274045/bom:102266946	2	1	ENSBMUG00000007047	1	ENSBMUG00000018299
bom04640	Hematopoietic cell lineage	1/158	81/6400	0.869673	0.959255	ENSBMUG00000010817	IL6R	bom:102287439	1	1	ENSBMUG00000010817	0
bom04145	Phagosome	2/158	142/6400	0.870887	0.959255	ENSBMUG00000015225/ENSBMUG00000021231	COMP/COLEC11	bom:102267028/bom:102264925	2	0		2	ENSBMUG00000015225/ENSBMUG00000021231
bom04620	Toll-like receptor signaling pathway	1/158	82/6400	0.872932	0.959255	ENSBMUG00000018621	P3R3URF	bom:102280296	1	0		1	ENSBMUG00000018621
bom05146	Amoebiasis	1/158	83/6400	0.876109	0.959255	ENSBMUG00000018621	P3R3URF	bom:102280296	1	0		1	ENSBMUG00000018621
bom05235	PD-L1 expression and PD-1 checkpoint pathway in cancer	1/158	83/6400	0.876109	0.959255	ENSBMUG00000018621	P3R3URF	bom:102280296	1	0		1	ENSBMUG00000018621
bom03010	Ribosome	2/158	147/6400	0.883167	0.959255	ENSBMUG00000004970/ENSBMUG00000025320	-/RPL10L	bom:102265038/bom:102267375	2	0		2	ENSBMUG00000004970/ENSBMUG00000025320
bom03013	RNA transport	2/158	148/6400	0.885491	0.959255	ENSBMUG00000006339/ENSBMUG00000004692	EIF4EBP1/-	bom:102278368/bom:102275203	2	0		2	ENSBMUG00000006339/ENSBMUG00000004692
bom04916	Melanogenesis	1/158	92/6400	0.901379	0.959255	ENSBMUG00000018299	LEF1	bom:102266946	1	0		1	ENSBMUG00000018299
bom04928	Parathyroid hormone synthesis, secretion and action	1/158	94/6400	0.906258	0.959255	ENSBMUG00000014920	HBEGF	bom:102283032	1	0		1	ENSBMUG00000014920
bom05168	Herpes simplex virus 1 infection	5/158	324/6400	0.908915	0.959255	ENSBMUG00000018621/ENSBMUG00000006339/ENSBMUG00000006340/ENSBMUG00000013243/ENSBMUG00000013532	P3R3URF/EIF4EBP1/TRAF5/SRSF5/CCL2	bom:102280296/bom:102278368/bom:102266053/bom:102266791/bom:102271913	5	0		5	ENSBMUG00000018621/ENSBMUG00000006339/ENSBMUG00000006340/ENSBMUG00000013243/ENSBMUG00000013532
bom04724	Glutamatergic synapse	1/158	96/6400	0.910897	0.959255	ENSBMUG00000009060	GRIN2B	bom:102273574	1	0		1	ENSBMUG00000009060
bom04070	Phosphatidylinositol signaling system	1/158	98/6400	0.915308	0.959255	ENSBMUG00000018621	P3R3URF	bom:102280296	1	0		1	ENSBMUG00000018621
bom05010	Alzheimer disease	2/158	163/6400	0.915598	0.959255	ENSBMUG00000006764/ENSBMUG00000009060	COX6B2/GRIN2B	bom:102286900/bom:102273574	2	0		2	ENSBMUG00000006764/ENSBMUG00000009060
bom04725	Cholinergic synapse	1/158	99/6400	0.917431	0.959255	ENSBMUG00000018621	P3R3URF	bom:102280296	1	0		1	ENSBMUG00000018621
bom05145	Toxoplasmosis	1/158	102/6400	0.923489	0.959255	ENSBMUG00000014712	HSPA1L	bom:102285944	1	0		1	ENSBMUG00000014712
bom05167	Kaposi sarcoma-associated herpesvirus infection	2/158	169/6400	0.925431	0.959255	ENSBMUG00000018621/ENSBMUG00000008022	P3R3URF/MYC	bom:102280296/bom:102274304	2	0		2	ENSBMUG00000018621/ENSBMUG00000008022
bom04360	Axon guidance	2/158	170/6400	0.926962	0.959255	ENSBMUG00000018621/ENSBMUG00000018526	P3R3URF/NTN4	bom:102280296/bom:102273243	2	0		2	ENSBMUG00000018621/ENSBMUG00000018526
bom04670	Leukocyte transendothelial migration	1/158	104/6400	0.92728	0.959255	ENSBMUG00000018621	P3R3URF	bom:102280296	1	0		1	ENSBMUG00000018621
bom04020	Calcium signaling pathway	2/158	177/6400	0.936879	0.964786	ENSBMUG00000011295/ENSBMUG00000007417	MYLK3/ORAI2	bom:102275601/bom:102278785	2	0		2	ENSBMUG00000011295/ENSBMUG00000007417
bom04071	Sphingolipid signaling pathway	1/158	112/6400	0.940666	0.964786	ENSBMUG00000018621	P3R3URF	bom:102280296	1	0		1	ENSBMUG00000018621
bom04723	Retrograde endocannabinoid signaling	1/158	122/6400	0.954006	0.966136	ENSBMUG00000018835	FAAH	bom:102283473	1	0		1	ENSBMUG00000018835
bom05170	Human immunodeficiency virus 1 infection	2/158	193/6400	0.954988	0.966136	ENSBMUG00000018621/ENSBMUG00000006340	P3R3URF/TRAF5	bom:102280296/bom:102266053	2	0		2	ENSBMUG00000018621/ENSBMUG00000006340
bom00190	Oxidative phosphorylation	1/158	123/6400	0.955164	0.966136	ENSBMUG00000006764	COX6B2	bom:102286900	1	0		1	ENSBMUG00000006764
bom04120	Ubiquitin mediated proteolysis	1/158	131/6400	0.96344	0.966136	ENSBMUG00000021060	ANAPC7	bom:102280797	1	1	ENSBMUG00000021060	0
bom05012	Parkinson disease	1/158	131/6400	0.96344	0.966136	ENSBMUG00000006764	COX6B2	bom:102286900	1	0		1	ENSBMUG00000006764
bom04514	Cell adhesion molecules (CAMs)	1/158	134/6400	0.966136	0.966136	ENSBMUG00000014175	NRXN2	bom:102265414	1	0		1	ENSBMUG00000014175
