# Supplementary material for: Effects of Intensive Fattening With Total Mixed Rations on Carcass Characteristics, Meat Quality, and Meat Chemical Composition of Yak and Mechanism Based on Serum and Transcriptomic Profiles
Source: Front Vet Sci. 2021 Jan 21;7:599418. doi: 10.3389/fvets.2020.599418 (PMC7859351; doi:10.3389/fvets.2020.599418)
Supplement: Supplementary file 2 [file Table_2.xlsx]

## Sheet: Table S4
Table S2 Fattening vs grazing_GO enrich list
Category	GOID	Description	GeneRatio	BgRatio	pvalue	padj	geneID	geneName	Count	Up	Up_Gene_names	Down	Down_Gene_names
BP	GO:0006508	proteolysis	35/174	399/5474	1.94932e-08	5.4191e-06	novel.1289/ENSBMUG00000022828/ENSBMUG00000004278/ENSBMUG00000003148/ENSBMUG00000006530/ENSBMUG00000010219/ENSBMUG00000010886/ENSBMUG00000011894/ENSBMUG00000022970/ENSBMUG00000004096/ENSBMUG00000013330/ENSBMUG00000016910/ENSBMUG00000004201/ENSBMUG00000023027/ENSBMUG00000001030/ENSBMUG00000007695/ENSBMUG00000007356/ENSBMUG00000020957/novel.658/ENSBMUG00000020847/ENSBMUG00000023151/ENSBMUG0000000319…	-/-/ADAM32/-/-/DDI1/-/CAPN11/-/-/PRSS37/-/ADAM2/-/-/PRSS58/F12/PCSK1/-/CTSF/MMEL1/-/CPA3/-/-/PAMR1/-/USP50/-/PRSS45P/PRSS21/PCSK4/F7/-/PRSS33	35	1	ENSBMUG00000001030	34	novel.1289/ENSBMUG00000022828/ENSBMUG00000004278/ENSBMUG00000003148/ENSBMUG00000006530/ENSBMUG00000010219/ENSBMUG00000010886/ENSBMUG00000011894/ENSBMUG00000022970/ENSBMUG00000004096/ENSBMUG00000013330/ENSBMUG00000016910/ENSBMUG00000004201/ENSBMUG00000023027/ENSBMUG00000007695/ENSBMUG00000007356/ENSBMUG00000020957/novel.658/ENSBMUG00000020847/ENSBMUG00000023151/ENSBMUG00000003198/ENSBMUG0000002218…
BP	GO:0019953	sexual reproduction	6/174	18/5474	1.27857e-05	0.00118481	ENSBMUG00000001078/ENSBMUG00000015716/ENSBMUG00000006999/ENSBMUG00000022527/ENSBMUG00000006380/ENSBMUG00000001515	GGN/-/-/ZPBP/SPATA16/-	6	0		6	ENSBMUG00000001078/ENSBMUG00000015716/ENSBMUG00000006999/ENSBMUG00000022527/ENSBMUG00000006380/ENSBMUG00000001515
BP	GO:0044703	multi-organism reproductive process	6/174	18/5474	1.27857e-05	0.00118481	ENSBMUG00000001078/ENSBMUG00000015716/ENSBMUG00000006999/ENSBMUG00000022527/ENSBMUG00000006380/ENSBMUG00000001515	GGN/-/-/ZPBP/SPATA16/-	6	0		6	ENSBMUG00000001078/ENSBMUG00000015716/ENSBMUG00000006999/ENSBMUG00000022527/ENSBMUG00000006380/ENSBMUG00000001515
BP	GO:0051704	multi-organism process	6/174	22/5474	4.62142e-05	0.00321189	ENSBMUG00000001078/ENSBMUG00000015716/ENSBMUG00000006999/ENSBMUG00000022527/ENSBMUG00000006380/ENSBMUG00000001515	GGN/-/-/ZPBP/SPATA16/-	6	0		6	ENSBMUG00000001078/ENSBMUG00000015716/ENSBMUG00000006999/ENSBMUG00000022527/ENSBMUG00000006380/ENSBMUG00000001515
BP	GO:0032504	multicellular organism reproduction	5/174	16/5474	0.000100665	0.00559695	ENSBMUG00000001078/ENSBMUG00000015716/ENSBMUG00000006999/ENSBMUG00000006380/ENSBMUG00000001515	GGN/-/-/SPATA16/-	5	0		5	ENSBMUG00000001078/ENSBMUG00000015716/ENSBMUG00000006999/ENSBMUG00000006380/ENSBMUG00000001515
BP	GO:0000003	reproduction	6/174	28/5474	0.000199079	0.006918	ENSBMUG00000001078/ENSBMUG00000015716/ENSBMUG00000006999/ENSBMUG00000022527/ENSBMUG00000006380/ENSBMUG00000001515	GGN/-/-/ZPBP/SPATA16/-	6	0		6	ENSBMUG00000001078/ENSBMUG00000015716/ENSBMUG00000006999/ENSBMUG00000022527/ENSBMUG00000006380/ENSBMUG00000001515
BP	GO:0022414	reproductive process	6/174	28/5474	0.000199079	0.006918	ENSBMUG00000001078/ENSBMUG00000015716/ENSBMUG00000006999/ENSBMUG00000022527/ENSBMUG00000006380/ENSBMUG00000001515	GGN/-/-/ZPBP/SPATA16/-	6	0		6	ENSBMUG00000001078/ENSBMUG00000015716/ENSBMUG00000006999/ENSBMUG00000022527/ENSBMUG00000006380/ENSBMUG00000001515
BP	GO:0044702	single organism reproductive process	6/174	28/5474	0.000199079	0.006918	ENSBMUG00000001078/ENSBMUG00000015716/ENSBMUG00000006999/ENSBMUG00000022527/ENSBMUG00000006380/ENSBMUG00000001515	GGN/-/-/ZPBP/SPATA16/-	6	0		6	ENSBMUG00000001078/ENSBMUG00000015716/ENSBMUG00000006999/ENSBMUG00000022527/ENSBMUG00000006380/ENSBMUG00000001515
BP	GO:0007276	gamete generation	4/174	14/5474	0.000769007	0.0213784	ENSBMUG00000001078/ENSBMUG00000015716/ENSBMUG00000006380/ENSBMUG00000001515	GGN/-/SPATA16/-	4	0		4	ENSBMUG00000001078/ENSBMUG00000015716/ENSBMUG00000006380/ENSBMUG00000001515
BP	GO:0048609	multicellular organismal reproductive process	4/174	14/5474	0.000769007	0.0213784	ENSBMUG00000001078/ENSBMUG00000015716/ENSBMUG00000006380/ENSBMUG00000001515	GGN/-/SPATA16/-	4	0		4	ENSBMUG00000001078/ENSBMUG00000015716/ENSBMUG00000006380/ENSBMUG00000001515
BP	GO:0032268	regulation of cellular protein metabolic process	4/174	16/5474	0.0013302	0.0336179	ENSBMUG00000026562/ENSBMUG00000014026/ENSBMUG00000006688/ENSBMUG00000006339	MAEL/-/-/EIF4EBP1	4	0		4	ENSBMUG00000026562/ENSBMUG00000014026/ENSBMUG00000006688/ENSBMUG00000006339
BP	GO:0051246	regulation of protein metabolic process	4/174	17/5474	0.00169674	0.0393078	ENSBMUG00000026562/ENSBMUG00000014026/ENSBMUG00000006688/ENSBMUG00000006339	MAEL/-/-/EIF4EBP1	4	0		4	ENSBMUG00000026562/ENSBMUG00000014026/ENSBMUG00000006688/ENSBMUG00000006339
BP	GO:0009890	negative regulation of biosynthetic process	3/174	16/5474	0.0130294	0.213068	ENSBMUG00000026562/ENSBMUG00000001596/ENSBMUG00000006339	MAEL/HEXIM1/EIF4EBP1	3	1	ENSBMUG00000001596	2	ENSBMUG00000026562/ENSBMUG00000006339
BP	GO:0010558	negative regulation of macromolecule biosynthetic process	3/174	16/5474	0.0130294	0.213068	ENSBMUG00000026562/ENSBMUG00000001596/ENSBMUG00000006339	MAEL/HEXIM1/EIF4EBP1	3	1	ENSBMUG00000001596	2	ENSBMUG00000026562/ENSBMUG00000006339
BP	GO:0031327	negative regulation of cellular biosynthetic process	3/174	16/5474	0.0130294	0.213068	ENSBMUG00000026562/ENSBMUG00000001596/ENSBMUG00000006339	MAEL/HEXIM1/EIF4EBP1	3	1	ENSBMUG00000001596	2	ENSBMUG00000026562/ENSBMUG00000006339
BP	GO:0051172	negative regulation of nitrogen compound metabolic process	3/174	16/5474	0.0130294	0.213068	ENSBMUG00000026562/ENSBMUG00000001596/ENSBMUG00000006339	MAEL/HEXIM1/EIF4EBP1	3	1	ENSBMUG00000001596	2	ENSBMUG00000026562/ENSBMUG00000006339
BP	GO:2000113	negative regulation of cellular macromolecule biosynthetic process	3/174	16/5474	0.0130294	0.213068	ENSBMUG00000026562/ENSBMUG00000001596/ENSBMUG00000006339	MAEL/HEXIM1/EIF4EBP1	3	1	ENSBMUG00000001596	2	ENSBMUG00000026562/ENSBMUG00000006339
BP	GO:0006955	immune response	7/174	85/5474	0.0178699	0.265179	ENSBMUG00000022899/ENSBMUG00000018298/ENSBMUG00000013512/ENSBMUG00000013532/ENSBMUG00000010806/ENSBMUG00000003217/ENSBMUG00000007774	PRG4/CCL21/-/CCL2/LAT2/-/CCL24	7	1	ENSBMUG00000022899	6	ENSBMUG00000018298/ENSBMUG00000013512/ENSBMUG00000013532/ENSBMUG00000010806/ENSBMUG00000003217/ENSBMUG00000007774
BP	GO:0031324	negative regulation of cellular metabolic process	3/174	18/5474	0.0181237	0.265179	ENSBMUG00000026562/ENSBMUG00000001596/ENSBMUG00000006339	MAEL/HEXIM1/EIF4EBP1	3	1	ENSBMUG00000001596	2	ENSBMUG00000026562/ENSBMUG00000006339
BP	GO:0051336	regulation of hydrolase activity	3/174	20/5474	0.0241742	0.331406	ENSBMUG00000014026/ENSBMUG00000006688/ENSBMUG00000011972	-/-/RASAL3	3	0		3	ENSBMUG00000014026/ENSBMUG00000006688/ENSBMUG00000011972
BP	GO:0002376	immune system process	7/174	91/5474	0.0250343	0.331406	ENSBMUG00000022899/ENSBMUG00000018298/ENSBMUG00000013512/ENSBMUG00000013532/ENSBMUG00000010806/ENSBMUG00000003217/ENSBMUG00000007774	PRG4/CCL21/-/CCL2/LAT2/-/CCL24	7	1	ENSBMUG00000022899	6	ENSBMUG00000018298/ENSBMUG00000013512/ENSBMUG00000013532/ENSBMUG00000010806/ENSBMUG00000003217/ENSBMUG00000007774
BP	GO:0010629	negative regulation of gene expression	3/174	22/5474	0.0311834	0.394045	ENSBMUG00000026562/ENSBMUG00000001596/ENSBMUG00000006339	MAEL/HEXIM1/EIF4EBP1	3	1	ENSBMUG00000001596	2	ENSBMUG00000026562/ENSBMUG00000006339
BP	GO:0015849	organic acid transport	3/174	23/5474	0.0350449	0.402058	ENSBMUG00000017781/ENSBMUG00000023637/ENSBMUG00000007822	SLC7A8/SLC7A2/PROCA1	3	1	ENSBMUG00000017781	2	ENSBMUG00000023637/ENSBMUG00000007822
BP	GO:0046942	carboxylic acid transport	3/174	23/5474	0.0350449	0.402058	ENSBMUG00000017781/ENSBMUG00000023637/ENSBMUG00000007822	SLC7A8/SLC7A2/PROCA1	3	1	ENSBMUG00000017781	2	ENSBMUG00000023637/ENSBMUG00000007822
BP	GO:0006820	anion transport	5/174	58/5474	0.0361563	0.402058	ENSBMUG00000017781/ENSBMUG00000013260/ENSBMUG00000007263/ENSBMUG00000023637/ENSBMUG00000007822	SLC7A8/SLC26A8/SLC4A4/SLC7A2/PROCA1	5	2	ENSBMUG00000017781/ENSBMUG00000007263	3	ENSBMUG00000013260/ENSBMUG00000023637/ENSBMUG00000007822
BP	GO:0010605	negative regulation of macromolecule metabolic process	3/174	24/5474	0.0391415	0.418512	ENSBMUG00000026562/ENSBMUG00000001596/ENSBMUG00000006339	MAEL/HEXIM1/EIF4EBP1	3	1	ENSBMUG00000001596	2	ENSBMUG00000026562/ENSBMUG00000006339
BP	GO:0009892	negative regulation of metabolic process	3/174	25/5474	0.0434702	0.431597	ENSBMUG00000026562/ENSBMUG00000001596/ENSBMUG00000006339	MAEL/HEXIM1/EIF4EBP1	3	1	ENSBMUG00000001596	2	ENSBMUG00000026562/ENSBMUG00000006339
BP	GO:0015711	organic anion transport	3/174	25/5474	0.0434702	0.431597	ENSBMUG00000017781/ENSBMUG00000023637/ENSBMUG00000007822	SLC7A8/SLC7A2/PROCA1	3	1	ENSBMUG00000017781	2	ENSBMUG00000023637/ENSBMUG00000007822
BP	GO:0050790	regulation of catalytic activity	3/174	27/5474	0.0528101	0.482386	ENSBMUG00000014026/ENSBMUG00000006688/ENSBMUG00000011972	-/-/RASAL3	3	0		3	ENSBMUG00000014026/ENSBMUG00000006688/ENSBMUG00000011972
BP	GO:0019220	regulation of phosphate metabolic process	2/174	12/5474	0.0537912	0.482386	ENSBMUG00000014026/ENSBMUG00000006688	-/-	2	0		2	ENSBMUG00000014026/ENSBMUG00000006688
BP	GO:0051174	regulation of phosphorus metabolic process	2/174	12/5474	0.0537912	0.482386	ENSBMUG00000014026/ENSBMUG00000006688	-/-	2	0		2	ENSBMUG00000014026/ENSBMUG00000006688
BP	GO:0065009	regulation of molecular function	3/174	29/5474	0.0630314	0.547585	ENSBMUG00000014026/ENSBMUG00000006688/ENSBMUG00000011972	-/-/RASAL3	3	0		3	ENSBMUG00000014026/ENSBMUG00000006688/ENSBMUG00000011972
BP	GO:0030154	cell differentiation	2/174	14/5474	0.071174	0.599587	ENSBMUG00000011359/ENSBMUG00000002240	-/CCHCR1	2	1	ENSBMUG00000011359	1	ENSBMUG00000002240
BP	GO:0003333	amino acid transmembrane transport	2/174	15/5474	0.0804568	0.604513	ENSBMUG00000017781/ENSBMUG00000023637	SLC7A8/SLC7A2	2	1	ENSBMUG00000017781	1	ENSBMUG00000023637
BP	GO:0006865	amino acid transport	2/174	15/5474	0.0804568	0.604513	ENSBMUG00000017781/ENSBMUG00000023637	SLC7A8/SLC7A2	2	1	ENSBMUG00000017781	1	ENSBMUG00000023637
BP	GO:1903825	organic acid transmembrane transport	2/174	15/5474	0.0804568	0.604513	ENSBMUG00000017781/ENSBMUG00000023637	SLC7A8/SLC7A2	2	1	ENSBMUG00000017781	1	ENSBMUG00000023637
BP	GO:1905039	carboxylic acid transmembrane transport	2/174	15/5474	0.0804568	0.604513	ENSBMUG00000017781/ENSBMUG00000023637	SLC7A8/SLC7A2	2	1	ENSBMUG00000017781	1	ENSBMUG00000023637
BP	GO:0032501	multicellular organismal process	6/174	96/5474	0.0841036	0.615284	ENSBMUG00000001078/ENSBMUG00000015716/ENSBMUG00000006999/ENSBMUG00000011359/ENSBMUG00000006380/ENSBMUG00000001515	GGN/-/-/-/SPATA16/-	6	1	ENSBMUG00000011359	5	ENSBMUG00000001078/ENSBMUG00000015716/ENSBMUG00000006999/ENSBMUG00000006380/ENSBMUG00000001515
BP	GO:0048523	negative regulation of cellular process	4/174	55/5474	0.0963786	0.678321	ENSBMUG00000026562/ENSBMUG00000004725/ENSBMUG00000001596/ENSBMUG00000006339	MAEL/CAPZA3/HEXIM1/EIF4EBP1	4	1	ENSBMUG00000001596	3	ENSBMUG00000026562/ENSBMUG00000004725/ENSBMUG00000006339
BP	GO:0006836	neurotransmitter transport	2/174	17/5474	0.10004	0.678321	ENSBMUG00000002758/ENSBMUG00000007666	SLC6A16/SLC6A1	2	0		2	ENSBMUG00000002758/ENSBMUG00000007666
BP	GO:0098656	anion transmembrane transport	2/174	17/5474	0.10004	0.678321	ENSBMUG00000017781/ENSBMUG00000023637	SLC7A8/SLC7A2	2	1	ENSBMUG00000017781	1	ENSBMUG00000023637
BP	GO:0048869	cellular developmental process	2/174	18/5474	0.11028	0.723249	ENSBMUG00000011359/ENSBMUG00000002240	-/CCHCR1	2	1	ENSBMUG00000011359	1	ENSBMUG00000002240
BP	GO:0045454	cell redox homeostasis	3/174	37/5474	0.111869	0.723249	ENSBMUG00000006767/ENSBMUG00000003847/ENSBMUG00000016884	TXNDC8/PDILT/-	3	0		3	ENSBMUG00000006767/ENSBMUG00000003847/ENSBMUG00000016884
BP	GO:1901565	organonitrogen compound catabolic process	2/174	19/5474	0.12078	0.763109	ENSBMUG00000021193/ENSBMUG00000014160	ALLC/HMOX1	2	1	ENSBMUG00000014160	1	ENSBMUG00000021193
BP	GO:0051260	protein homooligomerization	3/174	40/5474	0.133019	0.774887	ENSBMUG00000003932/ENSBMUG00000011862/ENSBMUG00000014825	KCTD19/KCNB1/KCNS3	3	1	ENSBMUG00000011862	2	ENSBMUG00000003932/ENSBMUG00000014825
BP	GO:0007018	microtubule-based movement	4/174	62/5474	0.13357	0.774887	ENSBMUG00000007273/ENSBMUG00000016767/ENSBMUG00000004035/ENSBMUG00000007850	KIF2B/KIF2C/KIF5C/DNAH1	4	0		4	ENSBMUG00000007273/ENSBMUG00000016767/ENSBMUG00000004035/ENSBMUG00000007850
BP	GO:0048519	negative regulation of biological process	4/174	62/5474	0.13357	0.774887	ENSBMUG00000026562/ENSBMUG00000004725/ENSBMUG00000001596/ENSBMUG00000006339	MAEL/CAPZA3/HEXIM1/EIF4EBP1	4	1	ENSBMUG00000001596	3	ENSBMUG00000026562/ENSBMUG00000004725/ENSBMUG00000006339
BP	GO:0044270	cellular nitrogen compound catabolic process	2/174	21/5474	0.142456	0.774887	ENSBMUG00000021193/ENSBMUG00000014160	ALLC/HMOX1	2	1	ENSBMUG00000014160	1	ENSBMUG00000021193
BP	GO:0044802	single-organism membrane organization	2/174	21/5474	0.142456	0.774887	ENSBMUG00000006999/ENSBMUG00000012109	-/CAV3	2	0		2	ENSBMUG00000006999/ENSBMUG00000012109
BP	GO:0046700	heterocycle catabolic process	2/174	21/5474	0.142456	0.774887	ENSBMUG00000021193/ENSBMUG00000014160	ALLC/HMOX1	2	1	ENSBMUG00000014160	1	ENSBMUG00000021193
BP	GO:0061024	membrane organization	2/174	21/5474	0.142456	0.774887	ENSBMUG00000006999/ENSBMUG00000012109	-/CAV3	2	0		2	ENSBMUG00000006999/ENSBMUG00000012109
BP	GO:0005975	carbohydrate metabolic process	7/174	137/5474	0.144943	0.774887	ENSBMUG00000011730/ENSBMUG00000005396/ENSBMUG00000014717/ENSBMUG00000018416/ENSBMUG00000023664/ENSBMUG00000005276/ENSBMUG00000005205	PGK2/GLT6D1/GK2/HK3/SLC3A2/-/-	7	1	ENSBMUG00000023664	6	ENSBMUG00000011730/ENSBMUG00000005396/ENSBMUG00000014717/ENSBMUG00000018416/ENSBMUG00000005276/ENSBMUG00000005205
BP	GO:0032787	monocarboxylic acid metabolic process	2/174	23/5474	0.164873	0.848791	ENSBMUG00000011730/ENSBMUG00000022222	PGK2/ACACB	2	1	ENSBMUG00000022222	1	ENSBMUG00000011730
BP	GO:1901361	organic cyclic compound catabolic process	2/174	23/5474	0.164873	0.848791	ENSBMUG00000021193/ENSBMUG00000014160	ALLC/HMOX1	2	1	ENSBMUG00000014160	1	ENSBMUG00000021193
BP	GO:0006813	potassium ion transport	2/174	25/5474	0.187854	0.875817	ENSBMUG00000011862/ENSBMUG00000006546	KCNB1/KCNU1	2	1	ENSBMUG00000011862	1	ENSBMUG00000006546
BP	GO:0006928	movement of cell or subcellular component	4/174	71/5474	0.188464	0.875817	ENSBMUG00000007273/ENSBMUG00000016767/ENSBMUG00000004035/ENSBMUG00000007850	KIF2B/KIF2C/KIF5C/DNAH1	4	0		4	ENSBMUG00000007273/ENSBMUG00000016767/ENSBMUG00000004035/ENSBMUG00000007850
BP	GO:0051259	protein oligomerization	3/174	48/5474	0.195091	0.875817	ENSBMUG00000003932/ENSBMUG00000011862/ENSBMUG00000014825	KCTD19/KCNB1/KCNS3	3	1	ENSBMUG00000011862	2	ENSBMUG00000003932/ENSBMUG00000014825
BP	GO:0019725	cellular homeostasis	3/174	51/5474	0.219975	0.875817	ENSBMUG00000006767/ENSBMUG00000003847/ENSBMUG00000016884	TXNDC8/PDILT/-	3	0		3	ENSBMUG00000006767/ENSBMUG00000003847/ENSBMUG00000016884
BP	GO:0044765	single-organism transport	7/174	156/5474	0.22704	0.875817	ENSBMUG00000017781/ENSBMUG00000002758/ENSBMUG00000007666/ENSBMUG00000013260/ENSBMUG00000023637/ENSBMUG00000007822/ENSBMUG00000001801	SLC7A8/SLC6A16/SLC6A1/SLC26A8/SLC7A2/PROCA1/CBLIF	7	1	ENSBMUG00000017781	6	ENSBMUG00000002758/ENSBMUG00000007666/ENSBMUG00000013260/ENSBMUG00000023637/ENSBMUG00000007822/ENSBMUG00000001801
BP	GO:0042592	homeostatic process	3/174	55/5474	0.254062	0.875817	ENSBMUG00000006767/ENSBMUG00000003847/ENSBMUG00000016884	TXNDC8/PDILT/-	3	0		3	ENSBMUG00000006767/ENSBMUG00000003847/ENSBMUG00000016884
BP	GO:1902578	single-organism localization	7/174	162/5474	0.255843	0.875817	ENSBMUG00000017781/ENSBMUG00000002758/ENSBMUG00000007666/ENSBMUG00000013260/ENSBMUG00000023637/ENSBMUG00000007822/ENSBMUG00000001801	SLC7A8/SLC6A16/SLC6A1/SLC26A8/SLC7A2/PROCA1/CBLIF	7	1	ENSBMUG00000017781	6	ENSBMUG00000002758/ENSBMUG00000007666/ENSBMUG00000013260/ENSBMUG00000023637/ENSBMUG00000007822/ENSBMUG00000001801
BP	GO:0006811	ion transport	13/174	337/5474	0.273412	0.875817	ENSBMUG00000017781/ENSBMUG00000013260/ENSBMUG00000000708/ENSBMUG00000007263/ENSBMUG00000011862/ENSBMUG00000014825/ENSBMUG00000023637/ENSBMUG00000011670/ENSBMUG00000005876/ENSBMUG00000006381/ENSBMUG00000007822/ENSBMUG00000006546/ENSBMUG00000016980	SLC7A8/SLC26A8/CATSPER1/SLC4A4/KCNB1/KCNS3/SLC7A2/SLC9B1/CHRND/RHCG/PROCA1/KCNU1/ATP7A	13	3	ENSBMUG00000017781/ENSBMUG00000007263/ENSBMUG00000011862	10	ENSBMUG00000013260/ENSBMUG00000000708/ENSBMUG00000014825/ENSBMUG00000023637/ENSBMUG00000011670/ENSBMUG00000005876/ENSBMUG00000006381/ENSBMUG00000007822/ENSBMUG00000006546/ENSBMUG00000016980
BP	GO:0006302	double-strand break repair	1/174	10/5474	0.276242	0.875817	ENSBMUG00000001078	GGN	1	0		1	ENSBMUG00000001078
BP	GO:0006631	fatty acid metabolic process	1/174	10/5474	0.276242	0.875817	ENSBMUG00000022222	ACACB	1	1	ENSBMUG00000022222	0
BP	GO:0016053	organic acid biosynthetic process	1/174	10/5474	0.276242	0.875817	ENSBMUG00000022222	ACACB	1	1	ENSBMUG00000022222	0
BP	GO:0046394	carboxylic acid biosynthetic process	1/174	10/5474	0.276242	0.875817	ENSBMUG00000022222	ACACB	1	1	ENSBMUG00000022222	0
BP	GO:0006461	protein complex assembly	4/174	87/5474	0.299027	0.875817	ENSBMUG00000003932/ENSBMUG00000004725/ENSBMUG00000011862/ENSBMUG00000014825	KCTD19/CAPZA3/KCNB1/KCNS3	4	1	ENSBMUG00000011862	3	ENSBMUG00000003932/ENSBMUG00000004725/ENSBMUG00000014825
BP	GO:0070271	protein complex biogenesis	4/174	87/5474	0.299027	0.875817	ENSBMUG00000003932/ENSBMUG00000004725/ENSBMUG00000011862/ENSBMUG00000014825	KCTD19/CAPZA3/KCNB1/KCNS3	4	1	ENSBMUG00000011862	3	ENSBMUG00000003932/ENSBMUG00000004725/ENSBMUG00000014825
BP	GO:0006090	pyruvate metabolic process	1/174	11/5474	0.29929	0.875817	ENSBMUG00000011730	PGK2	1	0		1	ENSBMUG00000011730
BP	GO:0006096	glycolytic process	1/174	11/5474	0.29929	0.875817	ENSBMUG00000011730	PGK2	1	0		1	ENSBMUG00000011730
BP	GO:0006165	nucleoside diphosphate phosphorylation	1/174	11/5474	0.29929	0.875817	ENSBMUG00000011730	PGK2	1	0		1	ENSBMUG00000011730
BP	GO:0006471	protein ADP-ribosylation	1/174	11/5474	0.29929	0.875817	ENSBMUG00000026826	-	1	0		1	ENSBMUG00000026826
BP	GO:0006757	ATP generation from ADP	1/174	11/5474	0.29929	0.875817	ENSBMUG00000011730	PGK2	1	0		1	ENSBMUG00000011730
BP	GO:0009132	nucleoside diphosphate metabolic process	1/174	11/5474	0.29929	0.875817	ENSBMUG00000011730	PGK2	1	0		1	ENSBMUG00000011730
BP	GO:0009135	purine nucleoside diphosphate metabolic process	1/174	11/5474	0.29929	0.875817	ENSBMUG00000011730	PGK2	1	0		1	ENSBMUG00000011730
BP	GO:0009179	purine ribonucleoside diphosphate metabolic process	1/174	11/5474	0.29929	0.875817	ENSBMUG00000011730	PGK2	1	0		1	ENSBMUG00000011730
BP	GO:0009185	ribonucleoside diphosphate metabolic process	1/174	11/5474	0.29929	0.875817	ENSBMUG00000011730	PGK2	1	0		1	ENSBMUG00000011730
BP	GO:0030042	actin filament depolymerization	1/174	11/5474	0.29929	0.875817	ENSBMUG00000004725	CAPZA3	1	0		1	ENSBMUG00000004725
BP	GO:0030834	regulation of actin filament depolymerization	1/174	11/5474	0.29929	0.875817	ENSBMUG00000004725	CAPZA3	1	0		1	ENSBMUG00000004725
BP	GO:0030835	negative regulation of actin filament depolymerization	1/174	11/5474	0.29929	0.875817	ENSBMUG00000004725	CAPZA3	1	0		1	ENSBMUG00000004725
BP	GO:0030837	negative regulation of actin filament polymerization	1/174	11/5474	0.29929	0.875817	ENSBMUG00000004725	CAPZA3	1	0		1	ENSBMUG00000004725
BP	GO:0031333	negative regulation of protein complex assembly	1/174	11/5474	0.29929	0.875817	ENSBMUG00000004725	CAPZA3	1	0		1	ENSBMUG00000004725
BP	GO:0032272	negative regulation of protein polymerization	1/174	11/5474	0.29929	0.875817	ENSBMUG00000004725	CAPZA3	1	0		1	ENSBMUG00000004725
BP	GO:0043242	negative regulation of protein complex disassembly	1/174	11/5474	0.29929	0.875817	ENSBMUG00000004725	CAPZA3	1	0		1	ENSBMUG00000004725
BP	GO:0045892	negative regulation of transcription, DNA-templated	1/174	11/5474	0.29929	0.875817	ENSBMUG00000001596	HEXIM1	1	1	ENSBMUG00000001596	0
BP	GO:0046031	ADP metabolic process	1/174	11/5474	0.29929	0.875817	ENSBMUG00000011730	PGK2	1	0		1	ENSBMUG00000011730
BP	GO:0046939	nucleotide phosphorylation	1/174	11/5474	0.29929	0.875817	ENSBMUG00000011730	PGK2	1	0		1	ENSBMUG00000011730
BP	GO:0051253	negative regulation of RNA metabolic process	1/174	11/5474	0.29929	0.875817	ENSBMUG00000001596	HEXIM1	1	1	ENSBMUG00000001596	0
BP	GO:0051261	protein depolymerization	1/174	11/5474	0.29929	0.875817	ENSBMUG00000004725	CAPZA3	1	0		1	ENSBMUG00000004725
BP	GO:0051693	actin filament capping	1/174	11/5474	0.29929	0.875817	ENSBMUG00000004725	CAPZA3	1	0		1	ENSBMUG00000004725
BP	GO:1901879	regulation of protein depolymerization	1/174	11/5474	0.29929	0.875817	ENSBMUG00000004725	CAPZA3	1	0		1	ENSBMUG00000004725
BP	GO:1901880	negative regulation of protein depolymerization	1/174	11/5474	0.29929	0.875817	ENSBMUG00000004725	CAPZA3	1	0		1	ENSBMUG00000004725
BP	GO:1902679	negative regulation of RNA biosynthetic process	1/174	11/5474	0.29929	0.875817	ENSBMUG00000001596	HEXIM1	1	1	ENSBMUG00000001596	0
BP	GO:1902904	negative regulation of supramolecular fiber organization	1/174	11/5474	0.29929	0.875817	ENSBMUG00000004725	CAPZA3	1	0		1	ENSBMUG00000004725
BP	GO:1903507	negative regulation of nucleic acid-templated transcription	1/174	11/5474	0.29929	0.875817	ENSBMUG00000001596	HEXIM1	1	1	ENSBMUG00000001596	0
BP	GO:0007017	microtubule-based process	4/174	90/5474	0.320761	0.877629	ENSBMUG00000007273/ENSBMUG00000016767/ENSBMUG00000004035/ENSBMUG00000007850	KIF2B/KIF2C/KIF5C/DNAH1	4	0		4	ENSBMUG00000007273/ENSBMUG00000016767/ENSBMUG00000004035/ENSBMUG00000007850
BP	GO:0065008	regulation of biological quality	4/174	90/5474	0.320761	0.877629	ENSBMUG00000004725/ENSBMUG00000006767/ENSBMUG00000003847/ENSBMUG00000016884	CAPZA3/TXNDC8/PDILT/-	4	0		4	ENSBMUG00000004725/ENSBMUG00000006767/ENSBMUG00000003847/ENSBMUG00000016884
BP	GO:0010256	endomembrane system organization	1/174	12/5474	0.321608	0.877629	ENSBMUG00000012109	CAV3	1	0		1	ENSBMUG00000012109
BP	GO:0016052	carbohydrate catabolic process	1/174	12/5474	0.321608	0.877629	ENSBMUG00000011730	PGK2	1	0		1	ENSBMUG00000011730
BP	GO:0044724	single-organism carbohydrate catabolic process	1/174	12/5474	0.321608	0.877629	ENSBMUG00000011730	PGK2	1	0		1	ENSBMUG00000011730
BP	GO:0045934	negative regulation of nucleobase-containing compound metabolic process	1/174	12/5474	0.321608	0.877629	ENSBMUG00000001596	HEXIM1	1	1	ENSBMUG00000001596	0
BP	GO:0006366	transcription from RNA polymerase II promoter	2/174	37/5474	0.329913	0.877629	ENSBMUG00000011465/ENSBMUG00000001596	GTF2A1L/HEXIM1	2	1	ENSBMUG00000001596	1	ENSBMUG00000011465
BP	GO:0071822	protein complex subunit organization	4/174	93/5474	0.342613	0.877629	ENSBMUG00000003932/ENSBMUG00000004725/ENSBMUG00000011862/ENSBMUG00000014825	KCTD19/CAPZA3/KCNB1/KCNS3	4	1	ENSBMUG00000011862	3	ENSBMUG00000003932/ENSBMUG00000004725/ENSBMUG00000014825
BP	GO:0033013	tetrapyrrole metabolic process	1/174	13/5474	0.343219	0.877629	ENSBMUG00000014160	HMOX1	1	1	ENSBMUG00000014160	0
BP	GO:0043244	regulation of protein complex disassembly	1/174	13/5474	0.343219	0.877629	ENSBMUG00000004725	CAPZA3	1	0		1	ENSBMUG00000004725
BP	GO:0051494	negative regulation of cytoskeleton organization	1/174	13/5474	0.343219	0.877629	ENSBMUG00000004725	CAPZA3	1	0		1	ENSBMUG00000004725
BP	GO:0043087	regulation of GTPase activity	1/174	15/5474	0.384409	0.877629	ENSBMUG00000011972	RASAL3	1	0		1	ENSBMUG00000011972
BP	GO:0016310	phosphorylation	17/174	492/5474	0.39571	0.877629	ENSBMUG00000011730/ENSBMUG00000005274/ENSBMUG00000010407/ENSBMUG00000020969/ENSBMUG00000003031/ENSBMUG00000025302/ENSBMUG00000000305/ENSBMUG00000024949/ENSBMUG00000011295/ENSBMUG00000000796/ENSBMUG00000021330/ENSBMUG00000001485/ENSBMUG00000008641/ENSBMUG00000008402/ENSBMUG00000008417/ENSBMUG00000009284/ENSBMUG00000020046	PGK2/TSSK1B/STK26/TEX14/MAK/GRK4/PRKCD/TSSK4/MYLK3/MAP3K20/CAMKV/MAP3K14/EEF2K/SRPK2/SGK1/PRKG1/NRK	17	2	ENSBMUG00000001485/ENSBMUG00000008641	15	ENSBMUG00000011730/ENSBMUG00000005274/ENSBMUG00000010407/ENSBMUG00000020969/ENSBMUG00000003031/ENSBMUG00000025302/ENSBMUG00000000305/ENSBMUG00000024949/ENSBMUG00000011295/ENSBMUG00000000796/ENSBMUG00000021330/ENSBMUG00000008402/ENSBMUG00000008417/ENSBMUG00000009284/ENSBMUG00000020046
BP	GO:0008064	regulation of actin polymerization or depolymerization	1/174	16/5474	0.40403	0.877629	ENSBMUG00000004725	CAPZA3	1	0		1	ENSBMUG00000004725
BP	GO:0008154	actin polymerization or depolymerization	1/174	16/5474	0.40403	0.877629	ENSBMUG00000004725	CAPZA3	1	0		1	ENSBMUG00000004725
BP	GO:0030041	actin filament polymerization	1/174	16/5474	0.40403	0.877629	ENSBMUG00000004725	CAPZA3	1	0		1	ENSBMUG00000004725
BP	GO:0030832	regulation of actin filament length	1/174	16/5474	0.40403	0.877629	ENSBMUG00000004725	CAPZA3	1	0		1	ENSBMUG00000004725
BP	GO:0030833	regulation of actin filament polymerization	1/174	16/5474	0.40403	0.877629	ENSBMUG00000004725	CAPZA3	1	0		1	ENSBMUG00000004725
BP	GO:0032271	regulation of protein polymerization	1/174	16/5474	0.40403	0.877629	ENSBMUG00000004725	CAPZA3	1	0		1	ENSBMUG00000004725
BP	GO:0032535	regulation of cellular component size	1/174	16/5474	0.40403	0.877629	ENSBMUG00000004725	CAPZA3	1	0		1	ENSBMUG00000004725
BP	GO:0032956	regulation of actin cytoskeleton organization	1/174	16/5474	0.40403	0.877629	ENSBMUG00000004725	CAPZA3	1	0		1	ENSBMUG00000004725
BP	GO:0032970	regulation of actin filament-based process	1/174	16/5474	0.40403	0.877629	ENSBMUG00000004725	CAPZA3	1	0		1	ENSBMUG00000004725
BP	GO:0043254	regulation of protein complex assembly	1/174	16/5474	0.40403	0.877629	ENSBMUG00000004725	CAPZA3	1	0		1	ENSBMUG00000004725
BP	GO:1902903	regulation of supramolecular fiber organization	1/174	16/5474	0.40403	0.877629	ENSBMUG00000004725	CAPZA3	1	0		1	ENSBMUG00000004725
BP	GO:0007156	homophilic cell adhesion via plasma membrane adhesion molecules	3/174	73/5474	0.411249	0.877629	ENSBMUG00000022733/ENSBMUG00000013264/ENSBMUG00000001883	PCDH1/CELSR3/CDH17	3	2	ENSBMUG00000022733/ENSBMUG00000001883	1	ENSBMUG00000013264
BP	GO:0098742	cell-cell adhesion via plasma-membrane adhesion molecules	3/174	73/5474	0.411249	0.877629	ENSBMUG00000022733/ENSBMUG00000013264/ENSBMUG00000001883	PCDH1/CELSR3/CDH17	3	2	ENSBMUG00000022733/ENSBMUG00000001883	1	ENSBMUG00000013264
BP	GO:0006468	protein phosphorylation	16/174	467/5474	0.414749	0.877629	ENSBMUG00000005274/ENSBMUG00000010407/ENSBMUG00000020969/ENSBMUG00000003031/ENSBMUG00000025302/ENSBMUG00000000305/ENSBMUG00000024949/ENSBMUG00000011295/ENSBMUG00000000796/ENSBMUG00000021330/ENSBMUG00000001485/ENSBMUG00000008641/ENSBMUG00000008402/ENSBMUG00000008417/ENSBMUG00000009284/ENSBMUG00000020046	TSSK1B/STK26/TEX14/MAK/GRK4/PRKCD/TSSK4/MYLK3/MAP3K20/CAMKV/MAP3K14/EEF2K/SRPK2/SGK1/PRKG1/NRK	16	2	ENSBMUG00000001485/ENSBMUG00000008641	14	ENSBMUG00000005274/ENSBMUG00000010407/ENSBMUG00000020969/ENSBMUG00000003031/ENSBMUG00000025302/ENSBMUG00000000305/ENSBMUG00000024949/ENSBMUG00000011295/ENSBMUG00000000796/ENSBMUG00000021330/ENSBMUG00000008402/ENSBMUG00000008417/ENSBMUG00000009284/ENSBMUG00000020046
BP	GO:0098609	cell-cell adhesion	3/174	74/5474	0.419829	0.877629	ENSBMUG00000022733/ENSBMUG00000013264/ENSBMUG00000001883	PCDH1/CELSR3/CDH17	3	2	ENSBMUG00000022733/ENSBMUG00000001883	1	ENSBMUG00000013264
BP	GO:0006470	protein dephosphorylation	2/174	45/5474	0.421562	0.877629	ENSBMUG00000014026/ENSBMUG00000006688	-/-	2	0		2	ENSBMUG00000014026/ENSBMUG00000006688
BP	GO:0010941	regulation of cell death	2/174	45/5474	0.421562	0.877629	ENSBMUG00000009423/ENSBMUG00000006091	BCL2L14/CRADD	2	0		2	ENSBMUG00000009423/ENSBMUG00000006091
BP	GO:0042981	regulation of apoptotic process	2/174	45/5474	0.421562	0.877629	ENSBMUG00000009423/ENSBMUG00000006091	BCL2L14/CRADD	2	0		2	ENSBMUG00000009423/ENSBMUG00000006091
BP	GO:0043067	regulation of programmed cell death	2/174	45/5474	0.421562	0.877629	ENSBMUG00000009423/ENSBMUG00000006091	BCL2L14/CRADD	2	0		2	ENSBMUG00000009423/ENSBMUG00000006091
BP	GO:0010639	negative regulation of organelle organization	1/174	17/5474	0.42303	0.877629	ENSBMUG00000004725	CAPZA3	1	0		1	ENSBMUG00000004725
BP	GO:0019882	antigen processing and presentation	1/174	17/5474	0.42303	0.877629	ENSBMUG00000003217	-	1	0		1	ENSBMUG00000003217
BP	GO:0032984	macromolecular complex disassembly	1/174	17/5474	0.42303	0.877629	ENSBMUG00000004725	CAPZA3	1	0		1	ENSBMUG00000004725
BP	GO:0043241	protein complex disassembly	1/174	17/5474	0.42303	0.877629	ENSBMUG00000004725	CAPZA3	1	0		1	ENSBMUG00000004725
BP	GO:0043624	cellular protein complex disassembly	1/174	17/5474	0.42303	0.877629	ENSBMUG00000004725	CAPZA3	1	0		1	ENSBMUG00000004725
BP	GO:0044087	regulation of cellular component biogenesis	1/174	17/5474	0.42303	0.877629	ENSBMUG00000004725	CAPZA3	1	0		1	ENSBMUG00000004725
BP	GO:0051129	negative regulation of cellular component organization	1/174	17/5474	0.42303	0.877629	ENSBMUG00000004725	CAPZA3	1	0		1	ENSBMUG00000004725
BP	GO:0006413	translational initiation	1/174	18/5474	0.441427	0.889251	ENSBMUG00000006339	EIF4EBP1	1	0		1	ENSBMUG00000006339
BP	GO:0009607	response to biotic stimulus	1/174	18/5474	0.441427	0.889251	ENSBMUG00000016814	-	1	0		1	ENSBMUG00000016814
BP	GO:0022411	cellular component disassembly	1/174	18/5474	0.441427	0.889251	ENSBMUG00000004725	CAPZA3	1	0		1	ENSBMUG00000004725
BP	GO:0044283	small molecule biosynthetic process	1/174	18/5474	0.441427	0.889251	ENSBMUG00000022222	ACACB	1	1	ENSBMUG00000022222	0
BP	GO:0006352	DNA-templated transcription, initiation	1/174	19/5474	0.459241	0.89279	ENSBMUG00000011465	GTF2A1L	1	0		1	ENSBMUG00000011465
BP	GO:0019362	pyridine nucleotide metabolic process	1/174	19/5474	0.459241	0.89279	ENSBMUG00000011730	PGK2	1	0		1	ENSBMUG00000011730
BP	GO:0046496	nicotinamide nucleotide metabolic process	1/174	19/5474	0.459241	0.89279	ENSBMUG00000011730	PGK2	1	0		1	ENSBMUG00000011730
BP	GO:0072524	pyridine-containing compound metabolic process	1/174	19/5474	0.459241	0.89279	ENSBMUG00000011730	PGK2	1	0		1	ENSBMUG00000011730
BP	GO:0090066	regulation of anatomical structure size	1/174	19/5474	0.459241	0.89279	ENSBMUG00000004725	CAPZA3	1	0		1	ENSBMUG00000004725
BP	GO:0051186	cofactor metabolic process	2/174	50/5474	0.475547	0.907288	ENSBMUG00000011730/ENSBMUG00000014160	PGK2/HMOX1	2	1	ENSBMUG00000014160	1	ENSBMUG00000011730
BP	GO:0006091	generation of precursor metabolites and energy	1/174	20/5474	0.476489	0.907288	ENSBMUG00000011730	PGK2	1	0		1	ENSBMUG00000011730
BP	GO:0007015	actin filament organization	1/174	20/5474	0.476489	0.907288	ENSBMUG00000004725	CAPZA3	1	0		1	ENSBMUG00000004725
BP	GO:0022607	cellular component assembly	5/174	144/5474	0.48564	0.918421	ENSBMUG00000003932/ENSBMUG00000004725/ENSBMUG00000011862/ENSBMUG00000014825/ENSBMUG00000012109	KCTD19/CAPZA3/KCNB1/KCNS3/CAV3	5	1	ENSBMUG00000011862	4	ENSBMUG00000003932/ENSBMUG00000004725/ENSBMUG00000014825/ENSBMUG00000012109
BP	GO:0006733	oxidoreduction coenzyme metabolic process	1/174	21/5474	0.493191	0.926399	ENSBMUG00000011730	PGK2	1	0		1	ENSBMUG00000011730
BP	GO:0030001	metal ion transport	3/174	84/5474	0.502929	0.927635	ENSBMUG00000011862/ENSBMUG00000006546/ENSBMUG00000016980	KCNB1/KCNU1/ATP7A	3	1	ENSBMUG00000011862	2	ENSBMUG00000006546/ENSBMUG00000016980
BP	GO:0006357	regulation of transcription from RNA polymerase II promoter	1/174	22/5474	0.509363	0.927635	ENSBMUG00000001596	HEXIM1	1	1	ENSBMUG00000001596	0
BP	GO:0019439	aromatic compound catabolic process	1/174	22/5474	0.509363	0.927635	ENSBMUG00000014160	HMOX1	1	1	ENSBMUG00000014160	0
BP	GO:0006915	apoptotic process	2/174	54/5474	0.516491	0.927635	ENSBMUG00000009423/ENSBMUG00000006091	BCL2L14/CRADD	2	0		2	ENSBMUG00000009423/ENSBMUG00000006091
BP	GO:0008219	cell death	2/174	54/5474	0.516491	0.927635	ENSBMUG00000009423/ENSBMUG00000006091	BCL2L14/CRADD	2	0		2	ENSBMUG00000009423/ENSBMUG00000006091
BP	GO:0012501	programmed cell death	2/174	54/5474	0.516491	0.927635	ENSBMUG00000009423/ENSBMUG00000006091	BCL2L14/CRADD	2	0		2	ENSBMUG00000009423/ENSBMUG00000006091
BP	GO:0016311	dephosphorylation	3/174	86/5474	0.518834	0.927635	ENSBMUG00000014026/ENSBMUG00000006688/ENSBMUG00000018940	-/-/-	3	0		3	ENSBMUG00000014026/ENSBMUG00000006688/ENSBMUG00000018940
BP	GO:0051493	regulation of cytoskeleton organization	1/174	23/5474	0.525022	0.927635	ENSBMUG00000004725	CAPZA3	1	0		1	ENSBMUG00000004725
BP	GO:0019752	carboxylic acid metabolic process	3/174	87/5474	0.526684	0.927635	ENSBMUG00000011730/ENSBMUG00000026439/ENSBMUG00000022222	PGK2/FAH/ACACB	3	1	ENSBMUG00000022222	2	ENSBMUG00000011730/ENSBMUG00000026439
BP	GO:0006082	organic acid metabolic process	3/174	88/5474	0.534464	0.927635	ENSBMUG00000011730/ENSBMUG00000026439/ENSBMUG00000022222	PGK2/FAH/ACACB	3	1	ENSBMUG00000022222	2	ENSBMUG00000011730/ENSBMUG00000026439
BP	GO:0043436	oxoacid metabolic process	3/174	88/5474	0.534464	0.927635	ENSBMUG00000011730/ENSBMUG00000026439/ENSBMUG00000022222	PGK2/FAH/ACACB	3	1	ENSBMUG00000022222	2	ENSBMUG00000011730/ENSBMUG00000026439
BP	GO:0051258	protein polymerization	1/174	24/5474	0.540183	0.927635	ENSBMUG00000004725	CAPZA3	1	0		1	ENSBMUG00000004725
BP	GO:0007155	cell adhesion	4/174	121/5474	0.540565	0.927635	ENSBMUG00000015225/ENSBMUG00000022733/ENSBMUG00000013264/ENSBMUG00000001883	COMP/PCDH1/CELSR3/CDH17	4	2	ENSBMUG00000022733/ENSBMUG00000001883	2	ENSBMUG00000015225/ENSBMUG00000013264
BP	GO:0022610	biological adhesion	4/174	121/5474	0.540565	0.927635	ENSBMUG00000015225/ENSBMUG00000022733/ENSBMUG00000013264/ENSBMUG00000001883	COMP/PCDH1/CELSR3/CDH17	4	2	ENSBMUG00000022733/ENSBMUG00000001883	2	ENSBMUG00000015225/ENSBMUG00000013264
BP	GO:0065003	macromolecular complex assembly	4/174	125/5474	0.566574	0.947327	ENSBMUG00000003932/ENSBMUG00000004725/ENSBMUG00000011862/ENSBMUG00000014825	KCTD19/CAPZA3/KCNB1/KCNS3	4	1	ENSBMUG00000011862	3	ENSBMUG00000003932/ENSBMUG00000004725/ENSBMUG00000014825
BP	GO:0006869	lipid transport	1/174	26/5474	0.569078	0.947327	ENSBMUG00000007822	PROCA1	1	0		1	ENSBMUG00000007822
BP	GO:0015698	inorganic anion transport	1/174	26/5474	0.569078	0.947327	ENSBMUG00000013260	SLC26A8	1	0		1	ENSBMUG00000013260
BP	GO:0046903	secretion	1/174	26/5474	0.569078	0.947327	ENSBMUG00000007822	PROCA1	1	0		1	ENSBMUG00000007822
BP	GO:0097435	supramolecular fiber organization	1/174	26/5474	0.569078	0.947327	ENSBMUG00000004725	CAPZA3	1	0		1	ENSBMUG00000004725
BP	GO:0006812	cation transport	5/174	160/5474	0.580212	0.960113	ENSBMUG00000011862/ENSBMUG00000011670/ENSBMUG00000006381/ENSBMUG00000006546/ENSBMUG00000016980	KCNB1/SLC9B1/RHCG/KCNU1/ATP7A	5	1	ENSBMUG00000011862	4	ENSBMUG00000011670/ENSBMUG00000006381/ENSBMUG00000006546/ENSBMUG00000016980
BP	GO:0010876	lipid localization	1/174	28/5474	0.596167	0.980676	ENSBMUG00000007822	PROCA1	1	0		1	ENSBMUG00000007822
BP	GO:0043933	macromolecular complex subunit organization	4/174	131/5474	0.604035	0.981785	ENSBMUG00000003932/ENSBMUG00000004725/ENSBMUG00000011862/ENSBMUG00000014825	KCTD19/CAPZA3/KCNB1/KCNS3	4	1	ENSBMUG00000011862	3	ENSBMUG00000003932/ENSBMUG00000004725/ENSBMUG00000014825
BP	GO:0046034	ATP metabolic process	1/174	29/5474	0.609069	0.981785	ENSBMUG00000011730	PGK2	1	0		1	ENSBMUG00000011730
BP	GO:0048583	regulation of response to stimulus	4/174	132/5474	0.610087	0.981785	ENSBMUG00000014026/ENSBMUG00000006688/ENSBMUG00000016217/ENSBMUG00000010806	-/-/FGD2/LAT2	4	0		4	ENSBMUG00000014026/ENSBMUG00000006688/ENSBMUG00000016217/ENSBMUG00000010806
BP	GO:0009144	purine nucleoside triphosphate metabolic process	1/174	30/5474	0.621562	0.981785	ENSBMUG00000011730	PGK2	1	0		1	ENSBMUG00000011730
BP	GO:0009199	ribonucleoside triphosphate metabolic process	1/174	30/5474	0.621562	0.981785	ENSBMUG00000011730	PGK2	1	0		1	ENSBMUG00000011730
BP	GO:0009205	purine ribonucleoside triphosphate metabolic process	1/174	30/5474	0.621562	0.981785	ENSBMUG00000011730	PGK2	1	0		1	ENSBMUG00000011730
BP	GO:0033043	regulation of organelle organization	1/174	30/5474	0.621562	0.981785	ENSBMUG00000004725	CAPZA3	1	0		1	ENSBMUG00000004725
BP	GO:0055085	transmembrane transport	11/174	367/5474	0.626149	0.983444	ENSBMUG00000017781/ENSBMUG00000000708/ENSBMUG00000011862/ENSBMUG00000014825/ENSBMUG00000023637/ENSBMUG00000003131/ENSBMUG00000011670/ENSBMUG00000006546/ENSBMUG00000001510/ENSBMUG00000001798/ENSBMUG00000018035	SLC7A8/CATSPER1/KCNB1/KCNS3/SLC7A2/SLC22A3/SLC9B1/KCNU1/SLC2A5/-/SLC22A14	11	3	ENSBMUG00000017781/ENSBMUG00000011862/ENSBMUG00000003131	8	ENSBMUG00000000708/ENSBMUG00000014825/ENSBMUG00000023637/ENSBMUG00000011670/ENSBMUG00000006546/ENSBMUG00000001510/ENSBMUG00000001798/ENSBMUG00000018035
BP	GO:0009126	purine nucleoside monophosphate metabolic process	1/174	32/5474	0.645368	0.991229	ENSBMUG00000011730	PGK2	1	0		1	ENSBMUG00000011730
BP	GO:0009141	nucleoside triphosphate metabolic process	1/174	32/5474	0.645368	0.991229	ENSBMUG00000011730	PGK2	1	0		1	ENSBMUG00000011730
BP	GO:0009161	ribonucleoside monophosphate metabolic process	1/174	32/5474	0.645368	0.991229	ENSBMUG00000011730	PGK2	1	0		1	ENSBMUG00000011730
BP	GO:0009167	purine ribonucleoside monophosphate metabolic process	1/174	32/5474	0.645368	0.991229	ENSBMUG00000011730	PGK2	1	0		1	ENSBMUG00000011730
BP	GO:0044085	cellular component biogenesis	5/174	173/5474	0.649848	0.992625	ENSBMUG00000003932/ENSBMUG00000004725/ENSBMUG00000011862/ENSBMUG00000014825/ENSBMUG00000012109	KCTD19/CAPZA3/KCNB1/KCNS3/CAV3	5	1	ENSBMUG00000011862	4	ENSBMUG00000003932/ENSBMUG00000004725/ENSBMUG00000014825/ENSBMUG00000012109
BP	GO:0009123	nucleoside monophosphate metabolic process	1/174	33/5474	0.656707	0.994339	ENSBMUG00000011730	PGK2	1	0		1	ENSBMUG00000011730
BP	GO:0034220	ion transmembrane transport	2/174	70/5474	0.658123	0.994339	ENSBMUG00000017781/ENSBMUG00000023637	SLC7A8/SLC7A2	2	1	ENSBMUG00000017781	1	ENSBMUG00000023637
BP	GO:0032502	developmental process	2/174	72/5474	0.673298	0.994992	ENSBMUG00000011359/ENSBMUG00000002240	-/CCHCR1	2	1	ENSBMUG00000011359	1	ENSBMUG00000002240
BP	GO:0044767	single-organism developmental process	2/174	72/5474	0.673298	0.994992	ENSBMUG00000011359/ENSBMUG00000002240	-/CCHCR1	2	1	ENSBMUG00000011359	1	ENSBMUG00000002240
BP	GO:0030029	actin filament-based process	1/174	35/5474	0.678315	0.994992	ENSBMUG00000004725	CAPZA3	1	0		1	ENSBMUG00000004725
BP	GO:0030036	actin cytoskeleton organization	1/174	35/5474	0.678315	0.994992	ENSBMUG00000004725	CAPZA3	1	0		1	ENSBMUG00000004725
BP	GO:0006732	coenzyme metabolic process	1/174	36/5474	0.688606	0.994992	ENSBMUG00000011730	PGK2	1	0		1	ENSBMUG00000011730
BP	GO:0044255	cellular lipid metabolic process	2/174	76/5474	0.702015	0.994992	ENSBMUG00000022222/ENSBMUG00000007822	ACACB/PROCA1	2	1	ENSBMUG00000022222	1	ENSBMUG00000007822
BP	GO:0071705	nitrogen compound transport	4/174	149/5474	0.704029	0.994992	ENSBMUG00000017781/ENSBMUG00000023637/ENSBMUG00000006381/ENSBMUG00000001801	SLC7A8/SLC7A2/RHCG/CBLIF	4	1	ENSBMUG00000017781	3	ENSBMUG00000023637/ENSBMUG00000006381/ENSBMUG00000001801
BP	GO:0043623	cellular protein complex assembly	1/174	38/5474	0.708216	0.994992	ENSBMUG00000004725	CAPZA3	1	0		1	ENSBMUG00000004725
BP	GO:0044723	single-organism carbohydrate metabolic process	1/174	40/5474	0.726598	0.994992	ENSBMUG00000011730	PGK2	1	0		1	ENSBMUG00000011730
BP	GO:1901575	organic substance catabolic process	3/174	122/5474	0.751437	0.994992	ENSBMUG00000011730/ENSBMUG00000021193/ENSBMUG00000014160	PGK2/ALLC/HMOX1	3	1	ENSBMUG00000014160	2	ENSBMUG00000011730/ENSBMUG00000021193
BP	GO:0015672	monovalent inorganic cation transport	2/174	84/5474	0.75319	0.994992	ENSBMUG00000011862/ENSBMUG00000006546	KCNB1/KCNU1	2	1	ENSBMUG00000011862	1	ENSBMUG00000006546
BP	GO:0033993	response to lipid	1/174	44/5474	0.759979	0.994992	ENSBMUG00000024807	RORC	1	0		1	ENSBMUG00000024807
BP	GO:0043401	steroid hormone mediated signaling pathway	1/174	44/5474	0.759979	0.994992	ENSBMUG00000024807	RORC	1	0		1	ENSBMUG00000024807
BP	GO:0044712	single-organism catabolic process	1/174	44/5474	0.759979	0.994992	ENSBMUG00000011730	PGK2	1	0		1	ENSBMUG00000011730
BP	GO:0048545	response to steroid hormone	1/174	44/5474	0.759979	0.994992	ENSBMUG00000024807	RORC	1	0		1	ENSBMUG00000024807
BP	GO:0051128	regulation of cellular component organization	1/174	44/5474	0.759979	0.994992	ENSBMUG00000004725	CAPZA3	1	0		1	ENSBMUG00000004725
BP	GO:0071383	cellular response to steroid hormone stimulus	1/174	44/5474	0.759979	0.994992	ENSBMUG00000024807	RORC	1	0		1	ENSBMUG00000024807
BP	GO:0071396	cellular response to lipid	1/174	44/5474	0.759979	0.994992	ENSBMUG00000024807	RORC	1	0		1	ENSBMUG00000024807
BP	GO:0071407	cellular response to organic cyclic compound	1/174	44/5474	0.759979	0.994992	ENSBMUG00000024807	RORC	1	0		1	ENSBMUG00000024807
BP	GO:0009117	nucleotide metabolic process	2/174	87/5474	0.770348	0.994992	ENSBMUG00000011730/ENSBMUG00000005486	PGK2/-	2	0		2	ENSBMUG00000011730/ENSBMUG00000005486
BP	GO:0009966	regulation of signal transduction	3/174	126/5474	0.770743	0.994992	ENSBMUG00000014026/ENSBMUG00000006688/ENSBMUG00000016217	-/-/FGD2	3	0		3	ENSBMUG00000014026/ENSBMUG00000006688/ENSBMUG00000016217
BP	GO:0010646	regulation of cell communication	3/174	126/5474	0.770743	0.994992	ENSBMUG00000014026/ENSBMUG00000006688/ENSBMUG00000016217	-/-/FGD2	3	0		3	ENSBMUG00000014026/ENSBMUG00000006688/ENSBMUG00000016217
BP	GO:0008610	lipid biosynthetic process	1/174	46/5474	0.775116	0.994992	ENSBMUG00000022222	ACACB	1	1	ENSBMUG00000022222	0
BP	GO:0009755	hormone-mediated signaling pathway	1/174	46/5474	0.775116	0.994992	ENSBMUG00000024807	RORC	1	0		1	ENSBMUG00000024807
BP	GO:0023051	regulation of signaling	3/174	127/5474	0.775376	0.994992	ENSBMUG00000014026/ENSBMUG00000006688/ENSBMUG00000016217	-/-/FGD2	3	0		3	ENSBMUG00000014026/ENSBMUG00000006688/ENSBMUG00000016217
BP	GO:0032870	cellular response to hormone stimulus	1/174	47/5474	0.782325	0.994992	ENSBMUG00000024807	RORC	1	0		1	ENSBMUG00000024807
BP	GO:0006753	nucleoside phosphate metabolic process	2/174	90/5474	0.786464	0.994992	ENSBMUG00000011730/ENSBMUG00000005486	PGK2/-	2	0		2	ENSBMUG00000011730/ENSBMUG00000005486
BP	GO:0009725	response to hormone	1/174	48/5474	0.789304	0.994992	ENSBMUG00000024807	RORC	1	0		1	ENSBMUG00000024807
BP	GO:0006457	protein folding	1/174	50/5474	0.802602	0.994992	ENSBMUG00000011334	CLGN	1	0		1	ENSBMUG00000011334
BP	GO:0006644	phospholipid metabolic process	1/174	50/5474	0.802602	0.994992	ENSBMUG00000007822	PROCA1	1	0		1	ENSBMUG00000007822
BP	GO:0009150	purine ribonucleotide metabolic process	1/174	50/5474	0.802602	0.994992	ENSBMUG00000011730	PGK2	1	0		1	ENSBMUG00000011730
BP	GO:0009259	ribonucleotide metabolic process	1/174	50/5474	0.802602	0.994992	ENSBMUG00000011730	PGK2	1	0		1	ENSBMUG00000011730
BP	GO:0009056	catabolic process	3/174	134/5474	0.805701	0.994992	ENSBMUG00000011730/ENSBMUG00000021193/ENSBMUG00000014160	PGK2/ALLC/HMOX1	3	1	ENSBMUG00000014160	2	ENSBMUG00000011730/ENSBMUG00000021193
BP	GO:0014070	response to organic cyclic compound	1/174	51/5474	0.808934	0.994992	ENSBMUG00000024807	RORC	1	0		1	ENSBMUG00000024807
BP	GO:0019693	ribose phosphate metabolic process	1/174	52/5474	0.815065	0.994992	ENSBMUG00000011730	PGK2	1	0		1	ENSBMUG00000011730
BP	GO:0006163	purine nucleotide metabolic process	1/174	53/5474	0.820999	0.994992	ENSBMUG00000011730	PGK2	1	0		1	ENSBMUG00000011730
BP	GO:0072521	purine-containing compound metabolic process	1/174	54/5474	0.826745	0.994992	ENSBMUG00000011730	PGK2	1	0		1	ENSBMUG00000011730
BP	GO:0071702	organic substance transport	4/174	179/5474	0.827962	0.994992	ENSBMUG00000017781/ENSBMUG00000023637/ENSBMUG00000007822/ENSBMUG00000001801	SLC7A8/SLC7A2/PROCA1/CBLIF	4	1	ENSBMUG00000017781	3	ENSBMUG00000023637/ENSBMUG00000007822/ENSBMUG00000001801
BP	GO:0016579	protein deubiquitination	1/174	55/5474	0.832307	0.994992	ENSBMUG00000010870	USP50	1	0		1	ENSBMUG00000010870
BP	GO:0070646	protein modification by small protein removal	1/174	55/5474	0.832307	0.994992	ENSBMUG00000010870	USP50	1	0		1	ENSBMUG00000010870
BP	GO:0006629	lipid metabolic process	3/174	141/5474	0.832532	0.994992	ENSBMUG00000002927/ENSBMUG00000022222/ENSBMUG00000007822	LCAT/ACACB/PROCA1	3	2	ENSBMUG00000002927/ENSBMUG00000022222	1	ENSBMUG00000007822
BP	GO:0071495	cellular response to endogenous stimulus	1/174	56/5474	0.837691	0.994992	ENSBMUG00000024807	RORC	1	0		1	ENSBMUG00000024807
BP	GO:0071310	cellular response to organic substance	1/174	57/5474	0.842904	0.994992	ENSBMUG00000024807	RORC	1	0		1	ENSBMUG00000024807
BP	GO:0006520	cellular amino acid metabolic process	1/174	58/5474	0.84795	0.994992	ENSBMUG00000026439	FAH	1	0		1	ENSBMUG00000026439
BP	GO:0070887	cellular response to chemical stimulus	1/174	58/5474	0.84795	0.994992	ENSBMUG00000024807	RORC	1	0		1	ENSBMUG00000024807
BP	GO:0019637	organophosphate metabolic process	3/174	146/5474	0.849706	0.994992	ENSBMUG00000011730/ENSBMUG00000005486/ENSBMUG00000007822	PGK2/-/PROCA1	3	0		3	ENSBMUG00000011730/ENSBMUG00000005486/ENSBMUG00000007822
BP	GO:0006486	protein glycosylation	1/174	59/5474	0.852835	0.994992	ENSBMUG00000026826	-	1	0		1	ENSBMUG00000026826
BP	GO:0009101	glycoprotein biosynthetic process	1/174	59/5474	0.852835	0.994992	ENSBMUG00000026826	-	1	0		1	ENSBMUG00000026826
BP	GO:0043413	macromolecule glycosylation	1/174	59/5474	0.852835	0.994992	ENSBMUG00000026826	-	1	0		1	ENSBMUG00000026826
BP	GO:0070085	glycosylation	1/174	59/5474	0.852835	0.994992	ENSBMUG00000026826	-	1	0		1	ENSBMUG00000026826
BP	GO:0055086	nucleobase-containing small molecule metabolic process	2/174	105/5474	0.852997	0.994992	ENSBMUG00000011730/ENSBMUG00000005486	PGK2/-	2	0		2	ENSBMUG00000011730/ENSBMUG00000005486
BP	GO:0044248	cellular catabolic process	2/174	106/5474	0.856685	0.994992	ENSBMUG00000021193/ENSBMUG00000014160	ALLC/HMOX1	2	1	ENSBMUG00000014160	1	ENSBMUG00000021193
BP	GO:0009100	glycoprotein metabolic process	1/174	60/5474	0.857564	0.994992	ENSBMUG00000026826	-	1	0		1	ENSBMUG00000026826
BP	GO:0006281	DNA repair	1/174	63/5474	0.870863	0.994992	ENSBMUG00000001078	GGN	1	0		1	ENSBMUG00000001078
BP	GO:0007275	multicellular organism development	1/174	64/5474	0.875015	0.994992	ENSBMUG00000011359	-	1	1	ENSBMUG00000011359	0
BP	GO:0009719	response to endogenous stimulus	1/174	64/5474	0.875015	0.994992	ENSBMUG00000024807	RORC	1	0		1	ENSBMUG00000024807
BP	GO:1902589	single-organism organelle organization	1/174	65/5474	0.879035	0.994992	ENSBMUG00000004725	CAPZA3	1	0		1	ENSBMUG00000004725
BP	GO:0007266	Rho protein signal transduction	1/174	66/5474	0.882927	0.994992	ENSBMUG00000016217	FGD2	1	0		1	ENSBMUG00000016217
BP	GO:0035023	regulation of Rho protein signal transduction	1/174	66/5474	0.882927	0.994992	ENSBMUG00000016217	FGD2	1	0		1	ENSBMUG00000016217
BP	GO:0010033	response to organic substance	1/174	68/5474	0.89034	0.994992	ENSBMUG00000024807	RORC	1	0		1	ENSBMUG00000024807
BP	GO:0006974	cellular response to DNA damage stimulus	1/174	69/5474	0.893869	0.994992	ENSBMUG00000001078	GGN	1	0		1	ENSBMUG00000001078
BP	GO:0033554	cellular response to stress	1/174	69/5474	0.893869	0.994992	ENSBMUG00000001078	GGN	1	0		1	ENSBMUG00000001078
BP	GO:0048856	anatomical structure development	1/174	70/5474	0.897286	0.994992	ENSBMUG00000011359	-	1	1	ENSBMUG00000011359	0
BP	GO:0007010	cytoskeleton organization	1/174	73/5474	0.906893	0.994992	ENSBMUG00000004725	CAPZA3	1	0		1	ENSBMUG00000004725
BP	GO:0070647	protein modification by small protein conjugation or removal	1/174	73/5474	0.906893	0.994992	ENSBMUG00000010870	USP50	1	0		1	ENSBMUG00000010870
BP	GO:0044281	small molecule metabolic process	4/174	212/5474	0.91149	0.994992	ENSBMUG00000011730/ENSBMUG00000005486/ENSBMUG00000026439/ENSBMUG00000022222	PGK2/-/FAH/ACACB	4	1	ENSBMUG00000022222	3	ENSBMUG00000011730/ENSBMUG00000005486/ENSBMUG00000026439
BP	GO:0016043	cellular component organization	6/174	293/5474	0.911736	0.994992	ENSBMUG00000003932/ENSBMUG00000004725/ENSBMUG00000006999/ENSBMUG00000011862/ENSBMUG00000014825/ENSBMUG00000012109	KCTD19/CAPZA3/-/KCNB1/KCNS3/CAV3	6	1	ENSBMUG00000011862	5	ENSBMUG00000003932/ENSBMUG00000004725/ENSBMUG00000006999/ENSBMUG00000014825/ENSBMUG00000012109
BP	GO:0044707	single-multicellular organism process	1/174	75/5474	0.912796	0.994992	ENSBMUG00000011359	-	1	1	ENSBMUG00000011359	0
BP	GO:0034622	cellular macromolecular complex assembly	1/174	76/5474	0.915607	0.994992	ENSBMUG00000004725	CAPZA3	1	0		1	ENSBMUG00000004725
BP	GO:0042221	response to chemical	1/174	76/5474	0.915607	0.994992	ENSBMUG00000024807	RORC	1	0		1	ENSBMUG00000024807
BP	GO:0007265	Ras protein signal transduction	1/174	81/5474	0.928364	0.994992	ENSBMUG00000016217	FGD2	1	0		1	ENSBMUG00000016217
BP	GO:0046578	regulation of Ras protein signal transduction	1/174	81/5474	0.928364	0.994992	ENSBMUG00000016217	FGD2	1	0		1	ENSBMUG00000016217
BP	GO:0007186	G-protein coupled receptor signaling pathway	6/174	311/5474	0.93704	0.994992	ENSBMUG00000001530/ENSBMUG00000004634/ENSBMUG00000008325/ENSBMUG00000013264/ENSBMUG00000011752/ENSBMUG00000014681	GPR157/MCHR1/HCRTR1/CELSR3/PENK/-	6	5	ENSBMUG00000001530/ENSBMUG00000004634/ENSBMUG00000008325/ENSBMUG00000011752/ENSBMUG00000014681	1	ENSBMUG00000013264
BP	GO:0055114	oxidation-reduction process	7/174	360/5474	0.946604	0.994992	ENSBMUG00000000748/ENSBMUG00000005040/ENSBMUG00000016744/ENSBMUG00000014160/ENSBMUG00000009991/ENSBMUG00000023225/ENSBMUG00000024538	CYP26B1/-/GAPDHS/HMOX1/PAH/CYP2S1/AASS	7	2	ENSBMUG00000000748/ENSBMUG00000014160	5	ENSBMUG00000005040/ENSBMUG00000016744/ENSBMUG00000009991/ENSBMUG00000023225/ENSBMUG00000024538
BP	GO:0071840	cellular component organization or biogenesis	6/174	322/5474	0.949148	0.994992	ENSBMUG00000003932/ENSBMUG00000004725/ENSBMUG00000006999/ENSBMUG00000011862/ENSBMUG00000014825/ENSBMUG00000012109	KCTD19/CAPZA3/-/KCNB1/KCNS3/CAV3	6	1	ENSBMUG00000011862	5	ENSBMUG00000003932/ENSBMUG00000004725/ENSBMUG00000006999/ENSBMUG00000014825/ENSBMUG00000012109
BP	GO:0051056	regulation of small GTPase mediated signal transduction	1/174	92/5474	0.950076	0.994992	ENSBMUG00000016217	FGD2	1	0		1	ENSBMUG00000016217
BP	GO:0043603	cellular amide metabolic process	4/174	242/5474	0.953982	0.994992	ENSBMUG00000026562/ENSBMUG00000021193/ENSBMUG00000025320/ENSBMUG00000006339	MAEL/ALLC/RPL10L/EIF4EBP1	4	0		4	ENSBMUG00000026562/ENSBMUG00000021193/ENSBMUG00000025320/ENSBMUG00000006339
BP	GO:1902531	regulation of intracellular signal transduction	1/174	97/5474	0.957643	0.994992	ENSBMUG00000016217	FGD2	1	0		1	ENSBMUG00000016217
BP	GO:1901564	organonitrogen compound metabolic process	7/174	384/5474	0.966222	0.994992	ENSBMUG00000011730/ENSBMUG00000026562/ENSBMUG00000021193/ENSBMUG00000026439/ENSBMUG00000025320/ENSBMUG00000006339/ENSBMUG00000014160	PGK2/MAEL/ALLC/FAH/RPL10L/EIF4EBP1/HMOX1	7	1	ENSBMUG00000014160	6	ENSBMUG00000011730/ENSBMUG00000026562/ENSBMUG00000021193/ENSBMUG00000026439/ENSBMUG00000025320/ENSBMUG00000006339
BP	GO:1901135	carbohydrate derivative metabolic process	2/174	164/5474	0.96978	0.994992	ENSBMUG00000011730/ENSBMUG00000026826	PGK2/-	2	0		2	ENSBMUG00000011730/ENSBMUG00000026826
BP	GO:0035556	intracellular signal transduction	4/174	264/5474	0.97223	0.994992	ENSBMUG00000006128/ENSBMUG00000000305/ENSBMUG00000020268/ENSBMUG00000016217	SOCS2/PRKCD/PLEK/FGD2	4	0		4	ENSBMUG00000006128/ENSBMUG00000000305/ENSBMUG00000020268/ENSBMUG00000016217
BP	GO:1901137	carbohydrate derivative biosynthetic process	1/174	110/5474	0.972395	0.994992	ENSBMUG00000026826	-	1	0		1	ENSBMUG00000026826
BP	GO:0006950	response to stress	1/174	112/5474	0.974157	0.994992	ENSBMUG00000001078	GGN	1	0		1	ENSBMUG00000001078
BP	GO:0006412	translation	3/174	221/5474	0.974778	0.994992	ENSBMUG00000026562/ENSBMUG00000025320/ENSBMUG00000006339	MAEL/RPL10L/EIF4EBP1	3	0		3	ENSBMUG00000026562/ENSBMUG00000025320/ENSBMUG00000006339
BP	GO:0043043	peptide biosynthetic process	3/174	223/5474	0.976032	0.994992	ENSBMUG00000026562/ENSBMUG00000025320/ENSBMUG00000006339	MAEL/RPL10L/EIF4EBP1	3	0		3	ENSBMUG00000026562/ENSBMUG00000025320/ENSBMUG00000006339
BP	GO:0043604	amide biosynthetic process	3/174	225/5474	0.977226	0.994992	ENSBMUG00000026562/ENSBMUG00000025320/ENSBMUG00000006339	MAEL/RPL10L/EIF4EBP1	3	0		3	ENSBMUG00000026562/ENSBMUG00000025320/ENSBMUG00000006339
BP	GO:0006259	DNA metabolic process	1/174	116/5474	0.977353	0.994992	ENSBMUG00000001078	GGN	1	0		1	ENSBMUG00000001078
BP	GO:0006396	RNA processing	1/174	119/5474	0.979488	0.994992	ENSBMUG00000015534	ADAD1	1	0		1	ENSBMUG00000015534
BP	GO:0007264	small GTPase mediated signal transduction	1/174	119/5474	0.979488	0.994992	ENSBMUG00000016217	FGD2	1	0		1	ENSBMUG00000016217
BP	GO:0006518	peptide metabolic process	3/174	233/5474	0.981463	0.994992	ENSBMUG00000026562/ENSBMUG00000025320/ENSBMUG00000006339	MAEL/RPL10L/EIF4EBP1	3	0		3	ENSBMUG00000026562/ENSBMUG00000025320/ENSBMUG00000006339
BP	GO:0044711	single-organism biosynthetic process	1/174	127/5474	0.984255	0.994992	ENSBMUG00000022222	ACACB	1	1	ENSBMUG00000022222	0
BP	GO:0033036	macromolecule localization	1/174	162/5474	0.995072	0.997713	ENSBMUG00000007822	PROCA1	1	0		1	ENSBMUG00000007822
BP	GO:1901566	organonitrogen compound biosynthetic process	3/174	295/5474	0.996486	0.997713	ENSBMUG00000026562/ENSBMUG00000025320/ENSBMUG00000006339	MAEL/RPL10L/EIF4EBP1	3	0		3	ENSBMUG00000026562/ENSBMUG00000025320/ENSBMUG00000006339
BP	GO:0006996	organelle organization	1/174	185/5474	0.997713	0.997713	ENSBMUG00000004725	CAPZA3	1	0		1	ENSBMUG00000004725
CC	GO:0005576	extracellular region	12/85	206/3232	0.00683625	0.317389	ENSBMUG00000015225/ENSBMUG00000025098/ENSBMUG00000000089/ENSBMUG00000022527/ENSBMUG00000004504/ENSBMUG00000007356/ENSBMUG00000017481/ENSBMUG00000018298/ENSBMUG00000013075/ENSBMUG00000013512/ENSBMUG00000013532/ENSBMUG00000007774	COMP/-/-/ZPBP/-/F12/SPOCK2/CCL21/F7/-/CCL2/CCL24	12	1	ENSBMUG00000017481	11	ENSBMUG00000015225/ENSBMUG00000025098/ENSBMUG00000000089/ENSBMUG00000022527/ENSBMUG00000004504/ENSBMUG00000007356/ENSBMUG00000018298/ENSBMUG00000013075/ENSBMUG00000013512/ENSBMUG00000013532/ENSBMUG00000007774
CC	GO:0034702	ion channel complex	3/85	21/3232	0.0165841	0.317389	ENSBMUG00000001024/ENSBMUG00000011862/ENSBMUG00000000971	-/KCNB1/-	3	1	ENSBMUG00000011862	2	ENSBMUG00000001024/ENSBMUG00000000971
CC	GO:0034703	cation channel complex	3/85	21/3232	0.0165841	0.317389	ENSBMUG00000001024/ENSBMUG00000011862/ENSBMUG00000000971	-/KCNB1/-	3	1	ENSBMUG00000011862	2	ENSBMUG00000001024/ENSBMUG00000000971
CC	GO:1902495	transmembrane transporter complex	3/85	25/3232	0.0266008	0.317389	ENSBMUG00000001024/ENSBMUG00000011862/ENSBMUG00000000971	-/KCNB1/-	3	1	ENSBMUG00000011862	2	ENSBMUG00000001024/ENSBMUG00000000971
CC	GO:1990351	transporter complex	3/85	25/3232	0.0266008	0.317389	ENSBMUG00000001024/ENSBMUG00000011862/ENSBMUG00000000971	-/KCNB1/-	3	1	ENSBMUG00000011862	2	ENSBMUG00000001024/ENSBMUG00000000971
CC	GO:0034704	calcium channel complex	2/85	10/3232	0.0268216	0.317389	ENSBMUG00000001024/ENSBMUG00000000971	-/-	2	0		2	ENSBMUG00000001024/ENSBMUG00000000971
CC	GO:0015629	actin cytoskeleton	4/85	58/3232	0.0646058	0.633852	ENSBMUG00000004725/ENSBMUG00000017263/ENSBMUG00000016379/ENSBMUG00000025738	CAPZA3/-/MYH3/MYO1F	4	0		4	ENSBMUG00000004725/ENSBMUG00000017263/ENSBMUG00000016379/ENSBMUG00000025738
CC	GO:0044459	plasma membrane part	4/85	60/3232	0.0714199	0.633852	ENSBMUG00000001024/ENSBMUG00000011862/ENSBMUG00000000971/ENSBMUG00000003217	-/KCNB1/-/-	4	1	ENSBMUG00000011862	3	ENSBMUG00000001024/ENSBMUG00000000971/ENSBMUG00000003217
CC	GO:0016459	myosin complex	3/85	41/3232	0.091598	0.659706	ENSBMUG00000017263/ENSBMUG00000016379/ENSBMUG00000025738	-/MYH3/MYO1F	3	0		3	ENSBMUG00000017263/ENSBMUG00000016379/ENSBMUG00000025738
CC	GO:0044430	cytoskeletal part	6/85	123/3232	0.102634	0.659706	ENSBMUG00000004725/ENSBMUG00000007850/ENSBMUG00000017263/ENSBMUG00000016379/ENSBMUG00000025738/ENSBMUG00000008686	CAPZA3/DNAH1/-/MYH3/MYO1F/-	6	0		6	ENSBMUG00000004725/ENSBMUG00000007850/ENSBMUG00000017263/ENSBMUG00000016379/ENSBMUG00000025738/ENSBMUG00000008686
CC	GO:0005886	plasma membrane	4/85	69/3232	0.106368	0.659706	ENSBMUG00000001024/ENSBMUG00000011862/ENSBMUG00000000971/ENSBMUG00000003217	-/KCNB1/-/-	4	1	ENSBMUG00000011862	3	ENSBMUG00000001024/ENSBMUG00000000971/ENSBMUG00000003217
CC	GO:0031410	cytoplasmic vesicle	2/85	24/3232	0.130083	0.659706	ENSBMUG00000006999/novel.862	-/-	2	0		2	ENSBMUG00000006999/novel.862
CC	GO:0031982	vesicle	2/85	24/3232	0.130083	0.659706	ENSBMUG00000006999/novel.862	-/-	2	0		2	ENSBMUG00000006999/novel.862
CC	GO:0097708	intracellular vesicle	2/85	24/3232	0.130083	0.659706	ENSBMUG00000006999/novel.862	-/-	2	0		2	ENSBMUG00000006999/novel.862
CC	GO:0071944	cell periphery	4/85	79/3232	0.152604	0.722326	ENSBMUG00000001024/ENSBMUG00000011862/ENSBMUG00000000971/ENSBMUG00000003217	-/KCNB1/-/-	4	1	ENSBMUG00000011862	3	ENSBMUG00000001024/ENSBMUG00000000971/ENSBMUG00000003217
CC	GO:0005856	cytoskeleton	6/85	143/3232	0.17201	0.763293	ENSBMUG00000004725/ENSBMUG00000007850/ENSBMUG00000017263/ENSBMUG00000016379/ENSBMUG00000025738/ENSBMUG00000008686	CAPZA3/DNAH1/-/MYH3/MYO1F/-	6	0		6	ENSBMUG00000004725/ENSBMUG00000007850/ENSBMUG00000017263/ENSBMUG00000016379/ENSBMUG00000025738/ENSBMUG00000008686
CC	GO:0090575	RNA polymerase II transcription factor complex	1/85	10/3232	0.234244	0.847211	ENSBMUG00000011465	GTF2A1L	1	0		1	ENSBMUG00000011465
CC	GO:0044798	nuclear transcription factor complex	1/85	11/3232	0.254446	0.847211	ENSBMUG00000011465	GTF2A1L	1	0		1	ENSBMUG00000011465
CC	GO:0005578	proteinaceous extracellular matrix	1/85	12/3232	0.27412	0.847211	ENSBMUG00000017481	SPOCK2	1	1	ENSBMUG00000017481	0
CC	GO:0042611	MHC protein complex	1/85	12/3232	0.27412	0.847211	ENSBMUG00000003217	-	1	0		1	ENSBMUG00000003217
CC	GO:0042613	MHC class II protein complex	1/85	12/3232	0.27412	0.847211	ENSBMUG00000003217	-	1	0		1	ENSBMUG00000003217
CC	GO:0000786	nucleosome	1/85	13/3232	0.293282	0.847211	ENSBMUG00000015716	-	1	0		1	ENSBMUG00000015716
CC	GO:0016591	DNA-directed RNA polymerase II, holoenzyme	1/85	14/3232	0.311943	0.847211	ENSBMUG00000011465	GTF2A1L	1	0		1	ENSBMUG00000011465
CC	GO:0032993	protein-DNA complex	1/85	14/3232	0.311943	0.847211	ENSBMUG00000015716	-	1	0		1	ENSBMUG00000015716
CC	GO:0044815	DNA packaging complex	1/85	14/3232	0.311943	0.847211	ENSBMUG00000015716	-	1	0		1	ENSBMUG00000015716
CC	GO:0012505	endomembrane system	4/85	113/3232	0.346117	0.847211	ENSBMUG00000011334/ENSBMUG00000006999/ENSBMUG00000006380/novel.862	CLGN/-/SPATA16/-	4	0		4	ENSBMUG00000011334/ENSBMUG00000006999/ENSBMUG00000006380/novel.862
CC	GO:0000428	DNA-directed RNA polymerase complex	1/85	16/3232	0.347817	0.847211	ENSBMUG00000011465	GTF2A1L	1	0		1	ENSBMUG00000011465
CC	GO:0030880	RNA polymerase complex	1/85	16/3232	0.347817	0.847211	ENSBMUG00000011465	GTF2A1L	1	0		1	ENSBMUG00000011465
CC	GO:0055029	nuclear DNA-directed RNA polymerase complex	1/85	16/3232	0.347817	0.847211	ENSBMUG00000011465	GTF2A1L	1	0		1	ENSBMUG00000011465
CC	GO:0000785	chromatin	1/85	17/3232	0.365055	0.847211	ENSBMUG00000015716	-	1	0		1	ENSBMUG00000015716
CC	GO:0030286	dynein complex	1/85	18/3232	0.381842	0.847211	ENSBMUG00000007850	DNAH1	1	0		1	ENSBMUG00000007850
CC	GO:0061695	transferase complex, transferring phosphorus-containing groups	1/85	18/3232	0.381842	0.847211	ENSBMUG00000011465	GTF2A1L	1	0		1	ENSBMUG00000011465
CC	GO:0005875	microtubule associated complex	1/85	22/3232	0.444714	0.95681	ENSBMUG00000007850	DNAH1	1	0		1	ENSBMUG00000007850
CC	GO:0005887	integral component of plasma membrane	1/85	25/3232	0.487681	0.961816	ENSBMUG00000011862	KCNB1	1	1	ENSBMUG00000011862	0
CC	GO:0031226	intrinsic component of plasma membrane	1/85	25/3232	0.487681	0.961816	ENSBMUG00000011862	KCNB1	1	1	ENSBMUG00000011862	0
CC	GO:0098797	plasma membrane protein complex	1/85	25/3232	0.487681	0.961816	ENSBMUG00000003217	-	1	0		1	ENSBMUG00000003217
CC	GO:0005667	transcription factor complex	1/85	27/3232	0.514483	0.981305	ENSBMUG00000011465	GTF2A1L	1	0		1	ENSBMUG00000011465
CC	GO:0031012	extracellular matrix	1/85	31/3232	0.563998	0.981305	ENSBMUG00000017481	SPOCK2	1	1	ENSBMUG00000017481	0
CC	GO:0005882	intermediate filament	1/85	32/3232	0.575576	0.981305	ENSBMUG00000008686	-	1	0		1	ENSBMUG00000008686
CC	GO:0045111	intermediate filament cytoskeleton	1/85	32/3232	0.575576	0.981305	ENSBMUG00000008686	-	1	0		1	ENSBMUG00000008686
CC	GO:0044422	organelle part	10/85	395/3232	0.602713	0.981305	ENSBMUG00000015716/ENSBMUG00000004725/ENSBMUG00000001024/ENSBMUG00000007850/ENSBMUG00000011465/ENSBMUG00000017263/ENSBMUG00000000971/ENSBMUG00000016379/ENSBMUG00000025738/ENSBMUG00000008686	-/CAPZA3/-/DNAH1/GTF2A1L/-/-/MYH3/MYO1F/-	10	0		10	ENSBMUG00000015716/ENSBMUG00000004725/ENSBMUG00000001024/ENSBMUG00000007850/ENSBMUG00000011465/ENSBMUG00000017263/ENSBMUG00000000971/ENSBMUG00000016379/ENSBMUG00000025738/ENSBMUG00000008686
CC	GO:0005794	Golgi apparatus	1/85	35/3232	0.608516	0.981305	ENSBMUG00000006380	SPATA16	1	0		1	ENSBMUG00000006380
CC	GO:0099513	polymeric cytoskeletal fiber	1/85	36/3232	0.618925	0.981305	ENSBMUG00000008686	-	1	0		1	ENSBMUG00000008686
CC	GO:1990234	transferase complex	1/85	37/3232	0.62906	0.981305	ENSBMUG00000011465	GTF2A1L	1	0		1	ENSBMUG00000011465
CC	GO:0015630	microtubule cytoskeleton	1/85	39/3232	0.648537	0.981305	ENSBMUG00000007850	DNAH1	1	0		1	ENSBMUG00000007850
CC	GO:0099080	supramolecular complex	1/85	44/3232	0.69292	0.981305	ENSBMUG00000008686	-	1	0		1	ENSBMUG00000008686
CC	GO:0099081	supramolecular polymer	1/85	44/3232	0.69292	0.981305	ENSBMUG00000008686	-	1	0		1	ENSBMUG00000008686
CC	GO:0099512	supramolecular fiber	1/85	44/3232	0.69292	0.981305	ENSBMUG00000008686	-	1	0		1	ENSBMUG00000008686
CC	GO:0044427	chromosomal part	1/85	48/3232	0.724397	0.981305	ENSBMUG00000015716	-	1	0		1	ENSBMUG00000015716
CC	GO:0005783	endoplasmic reticulum	1/85	50/3232	0.738918	0.981305	ENSBMUG00000011334	CLGN	1	0		1	ENSBMUG00000011334
CC	GO:0005654	nucleoplasm	1/85	52/3232	0.752682	0.981305	ENSBMUG00000011465	GTF2A1L	1	0		1	ENSBMUG00000011465
CC	GO:0044451	nucleoplasm part	1/85	52/3232	0.752682	0.981305	ENSBMUG00000011465	GTF2A1L	1	0		1	ENSBMUG00000011465
CC	GO:0043228	non-membrane-bounded organelle	8/85	363/3232	0.755141	0.981305	ENSBMUG00000015716/ENSBMUG00000025320/ENSBMUG00000004725/ENSBMUG00000007850/ENSBMUG00000017263/ENSBMUG00000016379/ENSBMUG00000025738/ENSBMUG00000008686	-/RPL10L/CAPZA3/DNAH1/-/MYH3/MYO1F/-	8	0		8	ENSBMUG00000015716/ENSBMUG00000025320/ENSBMUG00000004725/ENSBMUG00000007850/ENSBMUG00000017263/ENSBMUG00000016379/ENSBMUG00000025738/ENSBMUG00000008686
CC	GO:0043232	intracellular non-membrane-bounded organelle	8/85	363/3232	0.755141	0.981305	ENSBMUG00000015716/ENSBMUG00000025320/ENSBMUG00000004725/ENSBMUG00000007850/ENSBMUG00000017263/ENSBMUG00000016379/ENSBMUG00000025738/ENSBMUG00000008686	-/RPL10L/CAPZA3/DNAH1/-/MYH3/MYO1F/-	8	0		8	ENSBMUG00000015716/ENSBMUG00000025320/ENSBMUG00000004725/ENSBMUG00000007850/ENSBMUG00000017263/ENSBMUG00000016379/ENSBMUG00000025738/ENSBMUG00000008686
CC	GO:0044421	extracellular region part	1/85	57/3232	0.784034	0.981305	ENSBMUG00000017481	SPOCK2	1	1	ENSBMUG00000017481	0
CC	GO:1902494	catalytic complex	2/85	111/3232	0.797686	0.981305	ENSBMUG00000007850/ENSBMUG00000011465	DNAH1/GTF2A1L	2	0		2	ENSBMUG00000007850/ENSBMUG00000011465
CC	GO:0005694	chromosome	1/85	61/3232	0.806259	0.981305	ENSBMUG00000015716	-	1	0		1	ENSBMUG00000015716
CC	GO:0044446	intracellular organelle part	8/85	391/3232	0.825012	0.981305	ENSBMUG00000015716/ENSBMUG00000004725/ENSBMUG00000007850/ENSBMUG00000011465/ENSBMUG00000017263/ENSBMUG00000016379/ENSBMUG00000025738/ENSBMUG00000008686	-/CAPZA3/DNAH1/GTF2A1L/-/MYH3/MYO1F/-	8	0		8	ENSBMUG00000015716/ENSBMUG00000004725/ENSBMUG00000007850/ENSBMUG00000011465/ENSBMUG00000017263/ENSBMUG00000016379/ENSBMUG00000025738/ENSBMUG00000008686
CC	GO:0043234	protein complex	7/85	355/3232	0.841188	0.981305	ENSBMUG00000004725/ENSBMUG00000007850/ENSBMUG00000011465/ENSBMUG00000017263/ENSBMUG00000016379/ENSBMUG00000025738/ENSBMUG00000003217	CAPZA3/DNAH1/GTF2A1L/-/MYH3/MYO1F/-	7	0		7	ENSBMUG00000004725/ENSBMUG00000007850/ENSBMUG00000011465/ENSBMUG00000017263/ENSBMUG00000016379/ENSBMUG00000025738/ENSBMUG00000003217
CC	GO:0031981	nuclear lumen	1/85	72/3232	0.856382	0.981305	ENSBMUG00000011465	GTF2A1L	1	0		1	ENSBMUG00000011465
CC	GO:0005634	nucleus	9/85	459/3232	0.872369	0.981305	ENSBMUG00000015716/ENSBMUG00000026006/ENSBMUG00000011465/ENSBMUG00000008022/ENSBMUG00000005080/ENSBMUG00000024807/ENSBMUG00000001596/ENSBMUG00000010013/ENSBMUG00000013760	-/RFX2/GTF2A1L/MYC/ETS2/RORC/HEXIM1/-/CCNA1	9	2	ENSBMUG00000005080/ENSBMUG00000001596	7	ENSBMUG00000015716/ENSBMUG00000026006/ENSBMUG00000011465/ENSBMUG00000008022/ENSBMUG00000024807/ENSBMUG00000010013/ENSBMUG00000013760
CC	GO:0031974	membrane-enclosed lumen	1/85	80/3232	0.884557	0.981305	ENSBMUG00000011465	GTF2A1L	1	0		1	ENSBMUG00000011465
CC	GO:0043233	organelle lumen	1/85	80/3232	0.884557	0.981305	ENSBMUG00000011465	GTF2A1L	1	0		1	ENSBMUG00000011465
CC	GO:0070013	intracellular organelle lumen	1/85	80/3232	0.884557	0.981305	ENSBMUG00000011465	GTF2A1L	1	0		1	ENSBMUG00000011465
CC	GO:0044428	nuclear part	1/85	100/3232	0.93329	0.993219	ENSBMUG00000011465	GTF2A1L	1	0		1	ENSBMUG00000011465
CC	GO:0098796	membrane protein complex	1/85	104/3232	0.940246	0.993219	ENSBMUG00000003217	-	1	0		1	ENSBMUG00000003217
CC	GO:0044444	cytoplasmic part	5/85	388/3232	0.981542	0.993219	ENSBMUG00000011334/ENSBMUG00000025320/ENSBMUG00000006999/ENSBMUG00000006380/novel.862	CLGN/RPL10L/-/SPATA16/-	5	0		5	ENSBMUG00000011334/ENSBMUG00000025320/ENSBMUG00000006999/ENSBMUG00000006380/novel.862
CC	GO:0005737	cytoplasm	7/85	496/3232	0.983493	0.993219	ENSBMUG00000011334/ENSBMUG00000005486/ENSBMUG00000025320/ENSBMUG00000006999/ENSBMUG00000006380/ENSBMUG00000001596/novel.862	CLGN/-/RPL10L/-/SPATA16/HEXIM1/-	7	1	ENSBMUG00000001596	6	ENSBMUG00000011334/ENSBMUG00000005486/ENSBMUG00000025320/ENSBMUG00000006999/ENSBMUG00000006380/novel.862
CC	GO:0005840	ribosome	1/85	156/3232	0.985907	0.993219	ENSBMUG00000025320	RPL10L	1	0		1	ENSBMUG00000025320
CC	GO:0030529	intracellular ribonucleoprotein complex	1/85	182/3232	0.993219	0.993219	ENSBMUG00000025320	RPL10L	1	0		1	ENSBMUG00000025320
CC	GO:1990904	ribonucleoprotein complex	1/85	182/3232	0.993219	0.993219	ENSBMUG00000025320	RPL10L	1	0		1	ENSBMUG00000025320
MF	GO:0004252	serine-type endopeptidase activity	24/269	122/9025	1.08299e-13	1.92773e-11	novel.1289/ENSBMUG00000022828/ENSBMUG00000003148/ENSBMUG00000006530/ENSBMUG00000010886/ENSBMUG00000022970/ENSBMUG00000013330/ENSBMUG00000016910/ENSBMUG00000023027/ENSBMUG00000001030/ENSBMUG00000007695/ENSBMUG00000007356/ENSBMUG00000020957/novel.658/ENSBMUG00000003198/ENSBMUG00000009249/ENSBMUG00000002810/novel.1074/ENSBMUG00000002822/ENSBMUG00000014746/ENSBMUG00000003601/ENSBMUG00000013075/novel.…	-/-/-/-/-/-/PRSS37/-/-/-/PRSS58/F12/PCSK1/-/-/PAMR1/-/-/PRSS45P/PRSS21/PCSK4/F7/-/PRSS33	24	1	ENSBMUG00000001030	23	novel.1289/ENSBMUG00000022828/ENSBMUG00000003148/ENSBMUG00000006530/ENSBMUG00000010886/ENSBMUG00000022970/ENSBMUG00000013330/ENSBMUG00000016910/ENSBMUG00000023027/ENSBMUG00000007695/ENSBMUG00000007356/ENSBMUG00000020957/novel.658/ENSBMUG00000003198/ENSBMUG00000009249/ENSBMUG00000002810/novel.1074/ENSBMUG00000002822/ENSBMUG00000014746/ENSBMUG00000003601/ENSBMUG00000013075/novel.1122/ENSBMUG0000001…
MF	GO:0008236	serine-type peptidase activity	24/269	134/9025	9.42307e-13	5.59102e-11	novel.1289/ENSBMUG00000022828/ENSBMUG00000003148/ENSBMUG00000006530/ENSBMUG00000010886/ENSBMUG00000022970/ENSBMUG00000013330/ENSBMUG00000016910/ENSBMUG00000023027/ENSBMUG00000001030/ENSBMUG00000007695/ENSBMUG00000007356/ENSBMUG00000020957/novel.658/ENSBMUG00000003198/ENSBMUG00000009249/ENSBMUG00000002810/novel.1074/ENSBMUG00000002822/ENSBMUG00000014746/ENSBMUG00000003601/ENSBMUG00000013075/novel.…	-/-/-/-/-/-/PRSS37/-/-/-/PRSS58/F12/PCSK1/-/-/PAMR1/-/-/PRSS45P/PRSS21/PCSK4/F7/-/PRSS33	24	1	ENSBMUG00000001030	23	novel.1289/ENSBMUG00000022828/ENSBMUG00000003148/ENSBMUG00000006530/ENSBMUG00000010886/ENSBMUG00000022970/ENSBMUG00000013330/ENSBMUG00000016910/ENSBMUG00000023027/ENSBMUG00000007695/ENSBMUG00000007356/ENSBMUG00000020957/novel.658/ENSBMUG00000003198/ENSBMUG00000009249/ENSBMUG00000002810/novel.1074/ENSBMUG00000002822/ENSBMUG00000014746/ENSBMUG00000003601/ENSBMUG00000013075/novel.1122/ENSBMUG0000001…
MF	GO:0017171	serine hydrolase activity	24/269	134/9025	9.42307e-13	5.59102e-11	novel.1289/ENSBMUG00000022828/ENSBMUG00000003148/ENSBMUG00000006530/ENSBMUG00000010886/ENSBMUG00000022970/ENSBMUG00000013330/ENSBMUG00000016910/ENSBMUG00000023027/ENSBMUG00000001030/ENSBMUG00000007695/ENSBMUG00000007356/ENSBMUG00000020957/novel.658/ENSBMUG00000003198/ENSBMUG00000009249/ENSBMUG00000002810/novel.1074/ENSBMUG00000002822/ENSBMUG00000014746/ENSBMUG00000003601/ENSBMUG00000013075/novel.…	-/-/-/-/-/-/PRSS37/-/-/-/PRSS58/F12/PCSK1/-/-/PAMR1/-/-/PRSS45P/PRSS21/PCSK4/F7/-/PRSS33	24	1	ENSBMUG00000001030	23	novel.1289/ENSBMUG00000022828/ENSBMUG00000003148/ENSBMUG00000006530/ENSBMUG00000010886/ENSBMUG00000022970/ENSBMUG00000013330/ENSBMUG00000016910/ENSBMUG00000023027/ENSBMUG00000007695/ENSBMUG00000007356/ENSBMUG00000020957/novel.658/ENSBMUG00000003198/ENSBMUG00000009249/ENSBMUG00000002810/novel.1074/ENSBMUG00000002822/ENSBMUG00000014746/ENSBMUG00000003601/ENSBMUG00000013075/novel.1122/ENSBMUG0000001…
MF	GO:0004175	endopeptidase activity	31/269	256/9025	2.00841e-11	8.93744e-10	novel.1289/ENSBMUG00000022828/ENSBMUG00000004278/ENSBMUG00000003148/ENSBMUG00000006530/ENSBMUG00000010219/ENSBMUG00000010886/ENSBMUG00000011894/ENSBMUG00000022970/ENSBMUG00000004096/ENSBMUG00000013330/ENSBMUG00000016910/ENSBMUG00000004201/ENSBMUG00000023027/ENSBMUG00000001030/ENSBMUG00000007695/ENSBMUG00000007356/ENSBMUG00000020957/novel.658/ENSBMUG00000023151/ENSBMUG00000003198/ENSBMUG0000001627…	-/-/ADAM32/-/-/DDI1/-/CAPN11/-/-/PRSS37/-/ADAM2/-/-/PRSS58/F12/PCSK1/-/MMEL1/-/-/PAMR1/-/-/PRSS45P/PRSS21/PCSK4/F7/-/PRSS33	31	1	ENSBMUG00000001030	30	novel.1289/ENSBMUG00000022828/ENSBMUG00000004278/ENSBMUG00000003148/ENSBMUG00000006530/ENSBMUG00000010219/ENSBMUG00000010886/ENSBMUG00000011894/ENSBMUG00000022970/ENSBMUG00000004096/ENSBMUG00000013330/ENSBMUG00000016910/ENSBMUG00000004201/ENSBMUG00000023027/ENSBMUG00000007695/ENSBMUG00000007356/ENSBMUG00000020957/novel.658/ENSBMUG00000023151/ENSBMUG00000003198/ENSBMUG00000016279/ENSBMUG0000000924…
MF	GO:0070011	peptidase activity, acting on L-amino acid peptides	35/269	397/9025	6.38715e-09	2.27383e-07	novel.1289/ENSBMUG00000022828/ENSBMUG00000004278/ENSBMUG00000003148/ENSBMUG00000006530/ENSBMUG00000010219/ENSBMUG00000010886/ENSBMUG00000011894/ENSBMUG00000022970/ENSBMUG00000004096/ENSBMUG00000013330/ENSBMUG00000016910/ENSBMUG00000004201/ENSBMUG00000023027/ENSBMUG00000001030/ENSBMUG00000007695/ENSBMUG00000007356/ENSBMUG00000020957/novel.658/ENSBMUG00000020847/ENSBMUG00000023151/ENSBMUG0000000319…	-/-/ADAM32/-/-/DDI1/-/CAPN11/-/-/PRSS37/-/ADAM2/-/-/PRSS58/F12/PCSK1/-/CTSF/MMEL1/-/CPA3/-/-/PAMR1/-/USP50/-/PRSS45P/PRSS21/PCSK4/F7/-/PRSS33	35	1	ENSBMUG00000001030	34	novel.1289/ENSBMUG00000022828/ENSBMUG00000004278/ENSBMUG00000003148/ENSBMUG00000006530/ENSBMUG00000010219/ENSBMUG00000010886/ENSBMUG00000011894/ENSBMUG00000022970/ENSBMUG00000004096/ENSBMUG00000013330/ENSBMUG00000016910/ENSBMUG00000004201/ENSBMUG00000023027/ENSBMUG00000007695/ENSBMUG00000007356/ENSBMUG00000020957/novel.658/ENSBMUG00000020847/ENSBMUG00000023151/ENSBMUG00000003198/ENSBMUG0000002218…
MF	GO:0008233	peptidase activity	35/269	413/9025	1.7743e-08	5.26375e-07	novel.1289/ENSBMUG00000022828/ENSBMUG00000004278/ENSBMUG00000003148/ENSBMUG00000006530/ENSBMUG00000010219/ENSBMUG00000010886/ENSBMUG00000011894/ENSBMUG00000022970/ENSBMUG00000004096/ENSBMUG00000013330/ENSBMUG00000016910/ENSBMUG00000004201/ENSBMUG00000023027/ENSBMUG00000001030/ENSBMUG00000007695/ENSBMUG00000007356/ENSBMUG00000020957/novel.658/ENSBMUG00000020847/ENSBMUG00000023151/ENSBMUG0000000319…	-/-/ADAM32/-/-/DDI1/-/CAPN11/-/-/PRSS37/-/ADAM2/-/-/PRSS58/F12/PCSK1/-/CTSF/MMEL1/-/CPA3/-/-/PAMR1/-/USP50/-/PRSS45P/PRSS21/PCSK4/F7/-/PRSS33	35	1	ENSBMUG00000001030	34	novel.1289/ENSBMUG00000022828/ENSBMUG00000004278/ENSBMUG00000003148/ENSBMUG00000006530/ENSBMUG00000010219/ENSBMUG00000010886/ENSBMUG00000011894/ENSBMUG00000022970/ENSBMUG00000004096/ENSBMUG00000013330/ENSBMUG00000016910/ENSBMUG00000004201/ENSBMUG00000023027/ENSBMUG00000007695/ENSBMUG00000007356/ENSBMUG00000020957/novel.658/ENSBMUG00000020847/ENSBMUG00000023151/ENSBMUG00000003198/ENSBMUG0000002218…
MF	GO:0004857	enzyme inhibitor activity	8/269	69/9025	0.000971464	0.0247029	ENSBMUG00000008373/ENSBMUG00000002852/ENSBMUG00000014026/ENSBMUG00000004504/ENSBMUG00000006688/ENSBMUG00000002921/ENSBMUG00000002881/ENSBMUG00000001596	-/-/-/-/-/CSTL1/-/HEXIM1	8	1	ENSBMUG00000001596	7	ENSBMUG00000008373/ENSBMUG00000002852/ENSBMUG00000014026/ENSBMUG00000004504/ENSBMUG00000006688/ENSBMUG00000002921/ENSBMUG00000002881
MF	GO:0016903	oxidoreductase activity, acting on the aldehyde or oxo group of donors	3/269	11/9025	0.00361735	0.077775	ENSBMUG00000016744/ENSBMUG00000013257/ENSBMUG00000019773	GAPDHS/PDHA2/OGDHL	3	0		3	ENSBMUG00000016744/ENSBMUG00000013257/ENSBMUG00000019773
MF	GO:0008009	chemokine activity	4/269	23/9025	0.00436938	0.077775	ENSBMUG00000018298/ENSBMUG00000013512/ENSBMUG00000013532/ENSBMUG00000007774	CCL21/-/CCL2/CCL24	4	0		4	ENSBMUG00000018298/ENSBMUG00000013512/ENSBMUG00000013532/ENSBMUG00000007774
MF	GO:0042379	chemokine receptor binding	4/269	23/9025	0.00436938	0.077775	ENSBMUG00000018298/ENSBMUG00000013512/ENSBMUG00000013532/ENSBMUG00000007774	CCL21/-/CCL2/CCL24	4	0		4	ENSBMUG00000018298/ENSBMUG00000013512/ENSBMUG00000013532/ENSBMUG00000007774
MF	GO:0001664	G-protein coupled receptor binding	4/269	25/9025	0.00595743	0.096402	ENSBMUG00000018298/ENSBMUG00000013512/ENSBMUG00000013532/ENSBMUG00000007774	CCL21/-/CCL2/CCL24	4	0		4	ENSBMUG00000018298/ENSBMUG00000013512/ENSBMUG00000013532/ENSBMUG00000007774
MF	GO:0046982	protein heterodimerization activity	7/269	84/9025	0.0124232	0.173435	ENSBMUG00000010258/ENSBMUG00000023384/ENSBMUG00000010530/ENSBMUG00000021271/ENSBMUG00000001422/ENSBMUG00000000497/ENSBMUG00000003937	-/-/-/-/HIST2H2BE/-/BTBD11	7	2	ENSBMUG00000001422/ENSBMUG00000003937	5	ENSBMUG00000010258/ENSBMUG00000023384/ENSBMUG00000010530/ENSBMUG00000021271/ENSBMUG00000000497
MF	GO:0004866	endopeptidase inhibitor activity	5/269	48/9025	0.013641	0.173435	ENSBMUG00000008373/ENSBMUG00000002852/ENSBMUG00000004504/ENSBMUG00000002921/ENSBMUG00000002881	-/-/-/CSTL1/-	5	0		5	ENSBMUG00000008373/ENSBMUG00000002852/ENSBMUG00000004504/ENSBMUG00000002921/ENSBMUG00000002881
MF	GO:0061135	endopeptidase regulator activity	5/269	48/9025	0.013641	0.173435	ENSBMUG00000008373/ENSBMUG00000002852/ENSBMUG00000004504/ENSBMUG00000002921/ENSBMUG00000002881	-/-/-/CSTL1/-	5	0		5	ENSBMUG00000008373/ENSBMUG00000002852/ENSBMUG00000004504/ENSBMUG00000002921/ENSBMUG00000002881
MF	GO:0030234	enzyme regulator activity	9/269	136/9025	0.0202761	0.24061	ENSBMUG00000008373/ENSBMUG00000002852/ENSBMUG00000014026/ENSBMUG00000004504/ENSBMUG00000006688/ENSBMUG00000002921/ENSBMUG00000002881/ENSBMUG00000001596/ENSBMUG00000006676	-/-/-/-/-/CSTL1/-/HEXIM1/ACAP1	9	1	ENSBMUG00000001596	8	ENSBMUG00000008373/ENSBMUG00000002852/ENSBMUG00000014026/ENSBMUG00000004504/ENSBMUG00000006688/ENSBMUG00000002921/ENSBMUG00000002881/ENSBMUG00000006676
MF	GO:0005125	cytokine activity	4/269	37/9025	0.0235584	0.248626	ENSBMUG00000018298/ENSBMUG00000013512/ENSBMUG00000013532/ENSBMUG00000007774	CCL21/-/CCL2/CCL24	4	0		4	ENSBMUG00000018298/ENSBMUG00000013512/ENSBMUG00000013532/ENSBMUG00000007774
MF	GO:0030414	peptidase inhibitor activity	5/269	56/9025	0.025142	0.248626	ENSBMUG00000008373/ENSBMUG00000002852/ENSBMUG00000004504/ENSBMUG00000002921/ENSBMUG00000002881	-/-/-/CSTL1/-	5	0		5	ENSBMUG00000008373/ENSBMUG00000002852/ENSBMUG00000004504/ENSBMUG00000002921/ENSBMUG00000002881
MF	GO:0061134	peptidase regulator activity	5/269	56/9025	0.025142	0.248626	ENSBMUG00000008373/ENSBMUG00000002852/ENSBMUG00000004504/ENSBMUG00000002921/ENSBMUG00000002881	-/-/-/CSTL1/-	5	0		5	ENSBMUG00000008373/ENSBMUG00000002852/ENSBMUG00000004504/ENSBMUG00000002921/ENSBMUG00000002881
MF	GO:0003774	motor activity	7/269	100/9025	0.0295078	0.276441	ENSBMUG00000007273/ENSBMUG00000016767/ENSBMUG00000004035/ENSBMUG00000007850/ENSBMUG00000017263/ENSBMUG00000016379/ENSBMUG00000025738	KIF2B/KIF2C/KIF5C/DNAH1/-/MYH3/MYO1F	7	0		7	ENSBMUG00000007273/ENSBMUG00000016767/ENSBMUG00000004035/ENSBMUG00000007850/ENSBMUG00000017263/ENSBMUG00000016379/ENSBMUG00000025738
MF	GO:0005509	calcium ion binding	15/269	299/9025	0.0338214	0.301011	ENSBMUG00000015225/ENSBMUG00000011334/ENSBMUG00000022333/ENSBMUG00000011894/ENSBMUG00000014448/ENSBMUG00000014241/ENSBMUG00000016795/ENSBMUG00000017192/ENSBMUG00000022733/ENSBMUG00000013264/ENSBMUG00000017481/ENSBMUG00000001883/ENSBMUG00000011311/ENSBMUG00000001541/ENSBMUG00000013075	COMP/CLGN/CETN1/CAPN11/-/-/VLDLR/MYL6B/PCDH1/CELSR3/SPOCK2/CDH17/EFCAB1/-/F7	15	4	ENSBMUG00000016795/ENSBMUG00000022733/ENSBMUG00000017481/ENSBMUG00000001883	11	ENSBMUG00000015225/ENSBMUG00000011334/ENSBMUG00000022333/ENSBMUG00000011894/ENSBMUG00000014448/ENSBMUG00000014241/ENSBMUG00000017192/ENSBMUG00000013264/ENSBMUG00000011311/ENSBMUG00000001541/ENSBMUG00000013075
MF	GO:0008509	anion transmembrane transporter activity	4/269	44/9025	0.0412495	0.349638	ENSBMUG00000017781/ENSBMUG00000013260/ENSBMUG00000007263/ENSBMUG00000023637	SLC7A8/SLC26A8/SLC4A4/SLC7A2	4	2	ENSBMUG00000017781/ENSBMUG00000007263	2	ENSBMUG00000013260/ENSBMUG00000023637
MF	GO:0046906	tetrapyrrole binding	5/269	66/9025	0.0464227	0.37129	ENSBMUG00000007932/ENSBMUG00000000748/ENSBMUG00000024501/ENSBMUG00000001801/ENSBMUG00000023225	-/CYP26B1/-/CBLIF/CYP2S1	5	3	ENSBMUG00000007932/ENSBMUG00000000748/ENSBMUG00000024501	2	ENSBMUG00000001801/ENSBMUG00000023225
MF	GO:0019888	protein phosphatase regulator activity	2/269	12/9025	0.0479757	0.37129	ENSBMUG00000014026/ENSBMUG00000006688	-/-	2	0		2	ENSBMUG00000014026/ENSBMUG00000006688
MF	GO:0019208	phosphatase regulator activity	2/269	13/9025	0.0556078	0.412425	ENSBMUG00000014026/ENSBMUG00000006688	-/-	2	0		2	ENSBMUG00000014026/ENSBMUG00000006688
MF	GO:0005126	cytokine receptor binding	4/269	50/9025	0.061059	0.432545	ENSBMUG00000018298/ENSBMUG00000013512/ENSBMUG00000013532/ENSBMUG00000007774	CCL21/-/CCL2/CCL24	4	0		4	ENSBMUG00000018298/ENSBMUG00000013512/ENSBMUG00000013532/ENSBMUG00000007774
MF	GO:0005342	organic acid transmembrane transporter activity	2/269	15/9025	0.0720153	0.432545	ENSBMUG00000017781/ENSBMUG00000023637	SLC7A8/SLC7A2	2	1	ENSBMUG00000017781	1	ENSBMUG00000023637
MF	GO:0008514	organic anion transmembrane transporter activity	2/269	15/9025	0.0720153	0.432545	ENSBMUG00000017781/ENSBMUG00000023637	SLC7A8/SLC7A2	2	1	ENSBMUG00000017781	1	ENSBMUG00000023637
MF	GO:0015171	amino acid transmembrane transporter activity	2/269	15/9025	0.0720153	0.432545	ENSBMUG00000017781/ENSBMUG00000023637	SLC7A8/SLC7A2	2	1	ENSBMUG00000017781	1	ENSBMUG00000023637
MF	GO:0046943	carboxylic acid transmembrane transporter activity	2/269	15/9025	0.0720153	0.432545	ENSBMUG00000017781/ENSBMUG00000023637	SLC7A8/SLC7A2	2	1	ENSBMUG00000017781	1	ENSBMUG00000023637
MF	GO:0022857	transmembrane transporter activity	18/269	420/9025	0.076926	0.432545	ENSBMUG00000017781/ENSBMUG00000002758/ENSBMUG00000007666/ENSBMUG00000013260/ENSBMUG00000000708/ENSBMUG00000007263/ENSBMUG00000011862/ENSBMUG00000014825/ENSBMUG00000023637/ENSBMUG00000003131/ENSBMUG00000011670/ENSBMUG00000005876/ENSBMUG00000006381/ENSBMUG00000006546/ENSBMUG00000001510/ENSBMUG00000018035/ENSBMUG00000009060/ENSBMUG00000020557	SLC7A8/SLC6A16/SLC6A1/SLC26A8/CATSPER1/SLC4A4/KCNB1/KCNS3/SLC7A2/SLC22A3/SLC9B1/CHRND/RHCG/KCNU1/SLC2A5/SLC22A14/GRIN2B/SLC29A2	18	5	ENSBMUG00000017781/ENSBMUG00000007263/ENSBMUG00000011862/ENSBMUG00000003131/ENSBMUG00000020557	13	ENSBMUG00000002758/ENSBMUG00000007666/ENSBMUG00000013260/ENSBMUG00000000708/ENSBMUG00000014825/ENSBMUG00000023637/ENSBMUG00000011670/ENSBMUG00000005876/ENSBMUG00000006381/ENSBMUG00000006546/ENSBMUG00000001510/ENSBMUG00000018035/ENSBMUG00000009060
MF	GO:0035091	phosphatidylinositol binding	4/269	55/9025	0.0807734	0.432545	ENSBMUG00000017365/ENSBMUG00000003708/ENSBMUG00000017821/ENSBMUG00000008417	ARHGAP33/SNX15/NOXO1/SGK1	4	1	ENSBMUG00000003708	3	ENSBMUG00000017365/ENSBMUG00000017821/ENSBMUG00000008417
MF	GO:0004190	aspartic-type endopeptidase activity	2/269	17/9025	0.0897548	0.432545	ENSBMUG00000010219/ENSBMUG00000016279	DDI1/-	2	0		2	ENSBMUG00000010219/ENSBMUG00000016279
MF	GO:0005326	neurotransmitter transporter activity	2/269	17/9025	0.0897548	0.432545	ENSBMUG00000002758/ENSBMUG00000007666	SLC6A16/SLC6A1	2	0		2	ENSBMUG00000002758/ENSBMUG00000007666
MF	GO:0005328	neurotransmitter:sodium symporter activity	2/269	17/9025	0.0897548	0.432545	ENSBMUG00000002758/ENSBMUG00000007666	SLC6A16/SLC6A1	2	0		2	ENSBMUG00000002758/ENSBMUG00000007666
MF	GO:0015370	solute:sodium symporter activity	2/269	17/9025	0.0897548	0.432545	ENSBMUG00000002758/ENSBMUG00000007666	SLC6A16/SLC6A1	2	0		2	ENSBMUG00000002758/ENSBMUG00000007666
MF	GO:0070001	aspartic-type peptidase activity	2/269	17/9025	0.0897548	0.432545	ENSBMUG00000010219/ENSBMUG00000016279	DDI1/-	2	0		2	ENSBMUG00000010219/ENSBMUG00000016279
MF	GO:0022891	substrate-specific transmembrane transporter activity	15/269	344/9025	0.089911	0.432545	ENSBMUG00000017781/ENSBMUG00000002758/ENSBMUG00000007666/ENSBMUG00000013260/ENSBMUG00000000708/ENSBMUG00000007263/ENSBMUG00000011862/ENSBMUG00000014825/ENSBMUG00000023637/ENSBMUG00000011670/ENSBMUG00000005876/ENSBMUG00000006381/ENSBMUG00000006546/ENSBMUG00000009060/ENSBMUG00000020557	SLC7A8/SLC6A16/SLC6A1/SLC26A8/CATSPER1/SLC4A4/KCNB1/KCNS3/SLC7A2/SLC9B1/CHRND/RHCG/KCNU1/GRIN2B/SLC29A2	15	4	ENSBMUG00000017781/ENSBMUG00000007263/ENSBMUG00000011862/ENSBMUG00000020557	11	ENSBMUG00000002758/ENSBMUG00000007666/ENSBMUG00000013260/ENSBMUG00000000708/ENSBMUG00000014825/ENSBMUG00000023637/ENSBMUG00000011670/ENSBMUG00000005876/ENSBMUG00000006381/ENSBMUG00000006546/ENSBMUG00000009060
MF	GO:0003777	microtubule motor activity	4/269	59/9025	0.0985356	0.461562	ENSBMUG00000007273/ENSBMUG00000016767/ENSBMUG00000004035/ENSBMUG00000007850	KIF2B/KIF2C/KIF5C/DNAH1	4	0		4	ENSBMUG00000007273/ENSBMUG00000016767/ENSBMUG00000004035/ENSBMUG00000007850
MF	GO:0020037	heme binding	4/269	61/9025	0.108043	0.49312	ENSBMUG00000007932/ENSBMUG00000000748/ENSBMUG00000024501/ENSBMUG00000023225	-/CYP26B1/-/CYP2S1	4	3	ENSBMUG00000007932/ENSBMUG00000000748/ENSBMUG00000024501	1	ENSBMUG00000023225
MF	GO:0016782	transferase activity, transferring sulfur-containing groups	3/269	40/9025	0.115757	0.512063	ENSBMUG00000023995/ENSBMUG00000012523/ENSBMUG00000000469	-/-/-	3	0		3	ENSBMUG00000023995/ENSBMUG00000012523/ENSBMUG00000000469
MF	GO:0016705	oxidoreductase activity, acting on paired donors, with incorporation or reduction of molecular oxygen	4/269	63/9025	0.117947	0.512063	ENSBMUG00000000748/ENSBMUG00000014160/ENSBMUG00000009991/ENSBMUG00000023225	CYP26B1/HMOX1/PAH/CYP2S1	4	2	ENSBMUG00000000748/ENSBMUG00000014160	2	ENSBMUG00000009991/ENSBMUG00000023225
MF	GO:0008017	microtubule binding	4/269	65/9025	0.12823	0.519343	ENSBMUG00000007273/ENSBMUG00000016767/ENSBMUG00000014626/ENSBMUG00000004035	KIF2B/KIF2C/MAPRE2/KIF5C	4	1	ENSBMUG00000014626	3	ENSBMUG00000007273/ENSBMUG00000016767/ENSBMUG00000004035
MF	GO:0008237	metallopeptidase activity	6/269	115/9025	0.128597	0.519343	ENSBMUG00000004278/ENSBMUG00000004096/ENSBMUG00000004201/ENSBMUG00000023151/ENSBMUG00000022187/ENSBMUG00000024689	ADAM32/-/ADAM2/MMEL1/CPA3/-	6	0		6	ENSBMUG00000004278/ENSBMUG00000004096/ENSBMUG00000004201/ENSBMUG00000023151/ENSBMUG00000022187/ENSBMUG00000024689
MF	GO:0022892	substrate-specific transporter activity	15/269	365/9025	0.129404	0.519343	ENSBMUG00000017781/ENSBMUG00000002758/ENSBMUG00000007666/ENSBMUG00000013260/ENSBMUG00000000708/ENSBMUG00000007263/ENSBMUG00000011862/ENSBMUG00000014825/ENSBMUG00000023637/ENSBMUG00000011670/ENSBMUG00000005876/ENSBMUG00000006381/ENSBMUG00000006546/ENSBMUG00000009060/ENSBMUG00000020557	SLC7A8/SLC6A16/SLC6A1/SLC26A8/CATSPER1/SLC4A4/KCNB1/KCNS3/SLC7A2/SLC9B1/CHRND/RHCG/KCNU1/GRIN2B/SLC29A2	15	4	ENSBMUG00000017781/ENSBMUG00000007263/ENSBMUG00000011862/ENSBMUG00000020557	11	ENSBMUG00000002758/ENSBMUG00000007666/ENSBMUG00000013260/ENSBMUG00000000708/ENSBMUG00000014825/ENSBMUG00000023637/ENSBMUG00000011670/ENSBMUG00000005876/ENSBMUG00000006381/ENSBMUG00000006546/ENSBMUG00000009060
MF	GO:0015075	ion transmembrane transporter activity	14/269	337/9025	0.131295	0.519343	ENSBMUG00000017781/ENSBMUG00000002758/ENSBMUG00000007666/ENSBMUG00000013260/ENSBMUG00000000708/ENSBMUG00000007263/ENSBMUG00000011862/ENSBMUG00000014825/ENSBMUG00000023637/ENSBMUG00000011670/ENSBMUG00000005876/ENSBMUG00000006381/ENSBMUG00000006546/ENSBMUG00000009060	SLC7A8/SLC6A16/SLC6A1/SLC26A8/CATSPER1/SLC4A4/KCNB1/KCNS3/SLC7A2/SLC9B1/CHRND/RHCG/KCNU1/GRIN2B	14	3	ENSBMUG00000017781/ENSBMUG00000007263/ENSBMUG00000011862	11	ENSBMUG00000002758/ENSBMUG00000007666/ENSBMUG00000013260/ENSBMUG00000000708/ENSBMUG00000014825/ENSBMUG00000023637/ENSBMUG00000011670/ENSBMUG00000005876/ENSBMUG00000006381/ENSBMUG00000006546/ENSBMUG00000009060
MF	GO:0015294	solute:cation symporter activity	2/269	22/9025	0.138591	0.536286	ENSBMUG00000002758/ENSBMUG00000007666	SLC6A16/SLC6A1	2	0		2	ENSBMUG00000002758/ENSBMUG00000007666
MF	GO:0004867	serine-type endopeptidase inhibitor activity	2/269	23/9025	0.148947	0.564098	ENSBMUG00000008373/ENSBMUG00000004504	-/-	2	0		2	ENSBMUG00000008373/ENSBMUG00000004504
MF	GO:0015291	secondary active transmembrane transporter activity	3/269	47/9025	0.164084	0.594278	ENSBMUG00000002758/ENSBMUG00000007666/ENSBMUG00000011670	SLC6A16/SLC6A1/SLC9B1	3	0		3	ENSBMUG00000002758/ENSBMUG00000007666/ENSBMUG00000011670
MF	GO:0005215	transporter activity	19/269	500/9025	0.164253	0.594278	ENSBMUG00000017781/ENSBMUG00000002758/ENSBMUG00000007666/ENSBMUG00000013260/ENSBMUG00000000708/ENSBMUG00000007263/ENSBMUG00000011862/ENSBMUG00000014825/ENSBMUG00000023637/ENSBMUG00000003131/ENSBMUG00000011670/ENSBMUG00000005876/ENSBMUG00000006381/ENSBMUG00000006546/ENSBMUG00000001510/ENSBMUG00000001798/ENSBMUG00000018035/ENSBMUG00000009060/ENSBMUG00000020557	SLC7A8/SLC6A16/SLC6A1/SLC26A8/CATSPER1/SLC4A4/KCNB1/KCNS3/SLC7A2/SLC22A3/SLC9B1/CHRND/RHCG/KCNU1/SLC2A5/-/SLC22A14/GRIN2B/SLC29A2	19	5	ENSBMUG00000017781/ENSBMUG00000007263/ENSBMUG00000011862/ENSBMUG00000003131/ENSBMUG00000020557	14	ENSBMUG00000002758/ENSBMUG00000007666/ENSBMUG00000013260/ENSBMUG00000000708/ENSBMUG00000014825/ENSBMUG00000023637/ENSBMUG00000011670/ENSBMUG00000005876/ENSBMUG00000006381/ENSBMUG00000006546/ENSBMUG00000001510/ENSBMUG00000001798/ENSBMUG00000018035/ENSBMUG00000009060
MF	GO:0005543	phospholipid binding	4/269	72/9025	0.166932	0.594278	ENSBMUG00000017365/ENSBMUG00000003708/ENSBMUG00000017821/ENSBMUG00000008417	ARHGAP33/SNX15/NOXO1/SGK1	4	1	ENSBMUG00000003708	3	ENSBMUG00000017365/ENSBMUG00000017821/ENSBMUG00000008417
MF	GO:0098772	molecular function regulator	10/269	241/9025	0.18292	0.632103	ENSBMUG00000008373/ENSBMUG00000002852/ENSBMUG00000014026/ENSBMUG00000004504/ENSBMUG00000006688/ENSBMUG00000002921/ENSBMUG00000002881/ENSBMUG00000001596/ENSBMUG00000006676/ENSBMUG00000016217	-/-/-/-/-/CSTL1/-/HEXIM1/ACAP1/FGD2	10	1	ENSBMUG00000001596	9	ENSBMUG00000008373/ENSBMUG00000002852/ENSBMUG00000014026/ENSBMUG00000004504/ENSBMUG00000006688/ENSBMUG00000002921/ENSBMUG00000002881/ENSBMUG00000006676/ENSBMUG00000016217
MF	GO:0015631	tubulin binding	4/269	75/9025	0.184659	0.632103	ENSBMUG00000007273/ENSBMUG00000016767/ENSBMUG00000014626/ENSBMUG00000004035	KIF2B/KIF2C/MAPRE2/KIF5C	4	1	ENSBMUG00000014626	3	ENSBMUG00000007273/ENSBMUG00000016767/ENSBMUG00000004035
MF	GO:0004222	metalloendopeptidase activity	4/269	80/9025	0.215462	0.723629	ENSBMUG00000004278/ENSBMUG00000004096/ENSBMUG00000004201/ENSBMUG00000023151	ADAM32/-/ADAM2/MMEL1	4	0		4	ENSBMUG00000004278/ENSBMUG00000004096/ENSBMUG00000004201/ENSBMUG00000023151
MF	GO:0046983	protein dimerization activity	8/269	194/9025	0.222361	0.727161	ENSBMUG00000010258/ENSBMUG00000023384/ENSBMUG00000010530/ENSBMUG00000021271/ENSBMUG00000008022/ENSBMUG00000001422/ENSBMUG00000000497/ENSBMUG00000003937	-/-/-/-/MYC/HIST2H2BE/-/BTBD11	8	2	ENSBMUG00000001422/ENSBMUG00000003937	6	ENSBMUG00000010258/ENSBMUG00000023384/ENSBMUG00000010530/ENSBMUG00000021271/ENSBMUG00000008022/ENSBMUG00000000497
MF	GO:0015293	symporter activity	2/269	30/9025	0.224684	0.727161	ENSBMUG00000002758/ENSBMUG00000007666	SLC6A16/SLC6A1	2	0		2	ENSBMUG00000002758/ENSBMUG00000007666
MF	GO:0015081	sodium ion transmembrane transporter activity	2/269	32/9025	0.24691	0.784822	ENSBMUG00000002758/ENSBMUG00000007666	SLC6A16/SLC6A1	2	0		2	ENSBMUG00000002758/ENSBMUG00000007666
MF	GO:0019207	kinase regulator activity	1/269	10/9025	0.261214	0.81572	ENSBMUG00000001596	HEXIM1	1	1	ENSBMUG00000001596	0
MF	GO:0043565	sequence-specific DNA binding	5/269	119/9025	0.281494	0.842543	ENSBMUG00000008273/ENSBMUG00000005080/ENSBMUG00000024807/ENSBMUG00000018114/ENSBMUG00000010013	DMRTC2/ETS2/RORC/FOXM1/-	5	1	ENSBMUG00000005080	4	ENSBMUG00000008273/ENSBMUG00000024807/ENSBMUG00000018114/ENSBMUG00000010013
MF	GO:0016814	hydrolase activity, acting on carbon-nitrogen (but not peptide) bonds, in cyclic amidines	1/269	11/9025	0.283258	0.842543	ENSBMUG00000015534	ADAD1	1	0		1	ENSBMUG00000015534
MF	GO:0004674	protein serine/threonine kinase activity	3/269	67/9025	0.322446	0.842543	ENSBMUG00000000305/ENSBMUG00000008641/ENSBMUG00000008417	PRKCD/EEF2K/SGK1	3	1	ENSBMUG00000008641	2	ENSBMUG00000000305/ENSBMUG00000008417
MF	GO:0015298	solute:cation antiporter activity	1/269	13/9025	0.325401	0.842543	ENSBMUG00000011670	SLC9B1	1	0		1	ENSBMUG00000011670
MF	GO:0015299	solute:proton antiporter activity	1/269	13/9025	0.325401	0.842543	ENSBMUG00000011670	SLC9B1	1	0		1	ENSBMUG00000011670
MF	GO:0019239	deaminase activity	1/269	13/9025	0.325401	0.842543	ENSBMUG00000015534	ADAD1	1	0		1	ENSBMUG00000015534
MF	GO:0004672	protein kinase activity	16/269	473/9025	0.336432	0.842543	ENSBMUG00000005274/ENSBMUG00000010407/ENSBMUG00000020969/ENSBMUG00000003031/ENSBMUG00000025302/ENSBMUG00000000305/ENSBMUG00000024949/ENSBMUG00000011295/ENSBMUG00000000796/ENSBMUG00000021330/ENSBMUG00000001485/ENSBMUG00000008641/ENSBMUG00000008402/ENSBMUG00000008417/ENSBMUG00000009284/ENSBMUG00000020046	TSSK1B/STK26/TEX14/MAK/GRK4/PRKCD/TSSK4/MYLK3/MAP3K20/CAMKV/MAP3K14/EEF2K/SRPK2/SGK1/PRKG1/NRK	16	2	ENSBMUG00000001485/ENSBMUG00000008641	14	ENSBMUG00000005274/ENSBMUG00000010407/ENSBMUG00000020969/ENSBMUG00000003031/ENSBMUG00000025302/ENSBMUG00000000305/ENSBMUG00000024949/ENSBMUG00000011295/ENSBMUG00000000796/ENSBMUG00000021330/ENSBMUG00000008402/ENSBMUG00000008417/ENSBMUG00000009284/ENSBMUG00000020046
MF	GO:0004198	calcium-dependent cysteine-type endopeptidase activity	1/269	14/9025	0.345537	0.842543	ENSBMUG00000011894	CAPN11	1	0		1	ENSBMUG00000011894
MF	GO:0004970	ionotropic glutamate receptor activity	1/269	14/9025	0.345537	0.842543	ENSBMUG00000009060	GRIN2B	1	0		1	ENSBMUG00000009060
MF	GO:0005234	extracellular-glutamate-gated ion channel activity	1/269	14/9025	0.345537	0.842543	ENSBMUG00000009060	GRIN2B	1	0		1	ENSBMUG00000009060
MF	GO:0005249	voltage-gated potassium channel activity	1/269	14/9025	0.345537	0.842543	ENSBMUG00000011862	KCNB1	1	1	ENSBMUG00000011862	0
MF	GO:0008066	glutamate receptor activity	1/269	14/9025	0.345537	0.842543	ENSBMUG00000009060	GRIN2B	1	0		1	ENSBMUG00000009060
MF	GO:0022824	transmitter-gated ion channel activity	1/269	14/9025	0.345537	0.842543	ENSBMUG00000009060	GRIN2B	1	0		1	ENSBMUG00000009060
MF	GO:0022835	transmitter-gated channel activity	1/269	14/9025	0.345537	0.842543	ENSBMUG00000009060	GRIN2B	1	0		1	ENSBMUG00000009060
MF	GO:0030594	neurotransmitter receptor activity	1/269	14/9025	0.345537	0.842543	ENSBMUG00000009060	GRIN2B	1	0		1	ENSBMUG00000009060
MF	GO:0051015	actin filament binding	1/269	14/9025	0.345537	0.842543	ENSBMUG00000016379	MYH3	1	0		1	ENSBMUG00000016379
MF	GO:0008238	exopeptidase activity	2/269	42/9025	0.357569	0.84863	ENSBMUG00000022187/ENSBMUG00000024689	CPA3/-	2	0		2	ENSBMUG00000022187/ENSBMUG00000024689
MF	GO:0019842	vitamin binding	2/269	42/9025	0.357569	0.84863	ENSBMUG00000006355/ENSBMUG00000001801	GOT1L1/CBLIF	2	0		2	ENSBMUG00000006355/ENSBMUG00000001801
MF	GO:0015297	antiporter activity	1/269	15/9025	0.365075	0.855043	ENSBMUG00000011670	SLC9B1	1	0		1	ENSBMUG00000011670
MF	GO:0004197	cysteine-type endopeptidase activity	1/269	16/9025	0.384031	0.867324	ENSBMUG00000011894	CAPN11	1	0		1	ENSBMUG00000011894
MF	GO:0004497	monooxygenase activity	1/269	16/9025	0.384031	0.867324	ENSBMUG00000009991	PAH	1	0		1	ENSBMUG00000009991
MF	GO:0015077	monovalent inorganic cation transmembrane transporter activity	4/269	106/9025	0.389139	0.867324	ENSBMUG00000002758/ENSBMUG00000007666/ENSBMUG00000011862/ENSBMUG00000011670	SLC6A16/SLC6A1/KCNB1/SLC9B1	4	1	ENSBMUG00000011862	3	ENSBMUG00000002758/ENSBMUG00000007666/ENSBMUG00000011670
MF	GO:0016810	hydrolase activity, acting on carbon-nitrogen (but not peptide) bonds	2/269	45/9025	0.389808	0.867324	ENSBMUG00000015534/ENSBMUG00000021193	ADAD1/ALLC	2	0		2	ENSBMUG00000015534/ENSBMUG00000021193
MF	GO:0016791	phosphatase activity	4/269	107/9025	0.395927	0.869156	ENSBMUG00000005486/ENSBMUG00000021688/ENSBMUG00000006980/ENSBMUG00000018940	-/ALPL/-/-	4	1	ENSBMUG00000021688	3	ENSBMUG00000005486/ENSBMUG00000006980/ENSBMUG00000018940
MF	GO:0005230	extracellular ligand-gated ion channel activity	2/269	46/9025	0.400398	0.869156	ENSBMUG00000005876/ENSBMUG00000009060	CHRND/GRIN2B	2	0		2	ENSBMUG00000005876/ENSBMUG00000009060
MF	GO:0016758	transferase activity, transferring hexosyl groups	3/269	79/9025	0.420194	0.880091	ENSBMUG00000005396/ENSBMUG00000005276/ENSBMUG00000005205	GLT6D1/-/-	3	0		3	ENSBMUG00000005396/ENSBMUG00000005276/ENSBMUG00000005205
MF	GO:0008484	sulfuric ester hydrolase activity	1/269	18/9025	0.420268	0.880091	ENSBMUG00000013756	ARSB	1	1	ENSBMUG00000013756	0
MF	GO:0022843	voltage-gated cation channel activity	1/269	18/9025	0.420268	0.880091	ENSBMUG00000011862	KCNB1	1	1	ENSBMUG00000011862	0
MF	GO:0008289	lipid binding	4/269	113/9025	0.436343	0.885109	ENSBMUG00000017365/ENSBMUG00000003708/ENSBMUG00000017821/ENSBMUG00000008417	ARHGAP33/SNX15/NOXO1/SGK1	4	1	ENSBMUG00000003708	3	ENSBMUG00000017365/ENSBMUG00000017821/ENSBMUG00000008417
MF	GO:0004181	metallocarboxypeptidase activity	1/269	19/9025	0.437582	0.885109	ENSBMUG00000022187	CPA3	1	0		1	ENSBMUG00000022187
MF	GO:0008235	metalloexopeptidase activity	1/269	19/9025	0.437582	0.885109	ENSBMUG00000022187	CPA3	1	0		1	ENSBMUG00000022187
MF	GO:0005216	ion channel activity	6/269	183/9025	0.465208	0.888642	ENSBMUG00000000708/ENSBMUG00000011862/ENSBMUG00000014825/ENSBMUG00000005876/ENSBMUG00000006546/ENSBMUG00000009060	CATSPER1/KCNB1/KCNS3/CHRND/KCNU1/GRIN2B	6	1	ENSBMUG00000011862	5	ENSBMUG00000000708/ENSBMUG00000014825/ENSBMUG00000005876/ENSBMUG00000006546/ENSBMUG00000009060
MF	GO:0015267	channel activity	6/269	183/9025	0.465208	0.888642	ENSBMUG00000000708/ENSBMUG00000011862/ENSBMUG00000014825/ENSBMUG00000005876/ENSBMUG00000006546/ENSBMUG00000009060	CATSPER1/KCNB1/KCNS3/CHRND/KCNU1/GRIN2B	6	1	ENSBMUG00000011862	5	ENSBMUG00000000708/ENSBMUG00000014825/ENSBMUG00000005876/ENSBMUG00000006546/ENSBMUG00000009060
MF	GO:0022803	passive transmembrane transporter activity	6/269	183/9025	0.465208	0.888642	ENSBMUG00000000708/ENSBMUG00000011862/ENSBMUG00000014825/ENSBMUG00000005876/ENSBMUG00000006546/ENSBMUG00000009060	CATSPER1/KCNB1/KCNS3/CHRND/KCNU1/GRIN2B	6	1	ENSBMUG00000011862	5	ENSBMUG00000000708/ENSBMUG00000014825/ENSBMUG00000005876/ENSBMUG00000006546/ENSBMUG00000009060
MF	GO:0022838	substrate-specific channel activity	6/269	183/9025	0.465208	0.888642	ENSBMUG00000000708/ENSBMUG00000011862/ENSBMUG00000014825/ENSBMUG00000005876/ENSBMUG00000006546/ENSBMUG00000009060	CATSPER1/KCNB1/KCNS3/CHRND/KCNU1/GRIN2B	6	1	ENSBMUG00000011862	5	ENSBMUG00000000708/ENSBMUG00000014825/ENSBMUG00000005876/ENSBMUG00000006546/ENSBMUG00000009060
MF	GO:0008092	cytoskeletal protein binding	5/269	151/9025	0.470233	0.888642	ENSBMUG00000007273/ENSBMUG00000016767/ENSBMUG00000014626/ENSBMUG00000004035/ENSBMUG00000016379	KIF2B/KIF2C/MAPRE2/KIF5C/MYH3	5	1	ENSBMUG00000014626	4	ENSBMUG00000007273/ENSBMUG00000016767/ENSBMUG00000004035/ENSBMUG00000016379
MF	GO:0005231	excitatory extracellular ligand-gated ion channel activity	1/269	21/9025	0.47068	0.888642	ENSBMUG00000009060	GRIN2B	1	0		1	ENSBMUG00000009060
MF	GO:0004180	carboxypeptidase activity	1/269	22/9025	0.486494	0.888642	ENSBMUG00000022187	CPA3	1	0		1	ENSBMUG00000022187
MF	GO:0005102	receptor binding	6/269	190/9025	0.501665	0.888642	ENSBMUG00000025098/ENSBMUG00000002593/ENSBMUG00000018298/ENSBMUG00000013512/ENSBMUG00000013532/ENSBMUG00000007774	-/LRIF1/CCL21/-/CCL2/CCL24	6	0		6	ENSBMUG00000025098/ENSBMUG00000002593/ENSBMUG00000018298/ENSBMUG00000013512/ENSBMUG00000013532/ENSBMUG00000007774
MF	GO:0015103	inorganic anion transmembrane transporter activity	1/269	23/9025	0.501837	0.888642	ENSBMUG00000013260	SLC26A8	1	0		1	ENSBMUG00000013260
MF	GO:0052689	carboxylic ester hydrolase activity	1/269	23/9025	0.501837	0.888642	ENSBMUG00000007822	PROCA1	1	0		1	ENSBMUG00000007822
MF	GO:0015276	ligand-gated ion channel activity	2/269	57/9025	0.510383	0.888642	ENSBMUG00000005876/ENSBMUG00000009060	CHRND/GRIN2B	2	0		2	ENSBMUG00000005876/ENSBMUG00000009060
MF	GO:0022834	ligand-gated channel activity	2/269	57/9025	0.510383	0.888642	ENSBMUG00000005876/ENSBMUG00000009060	CHRND/GRIN2B	2	0		2	ENSBMUG00000005876/ENSBMUG00000009060
MF	GO:0005179	hormone activity	1/269	24/9025	0.516723	0.888642	ENSBMUG00000025098	-	1	0		1	ENSBMUG00000025098
MF	GO:0005267	potassium channel activity	1/269	24/9025	0.516723	0.888642	ENSBMUG00000011862	KCNB1	1	1	ENSBMUG00000011862	0
MF	GO:0022836	gated channel activity	3/269	92/9025	0.520266	0.888642	ENSBMUG00000011862/ENSBMUG00000005876/ENSBMUG00000009060	KCNB1/CHRND/GRIN2B	3	1	ENSBMUG00000011862	2	ENSBMUG00000005876/ENSBMUG00000009060
MF	GO:0015079	potassium ion transmembrane transporter activity	1/269	25/9025	0.531166	0.888642	ENSBMUG00000011862	KCNB1	1	1	ENSBMUG00000011862	0
MF	GO:0005506	iron ion binding	2/269	60/9025	0.53803	0.888642	ENSBMUG00000000748/ENSBMUG00000023225	CYP26B1/CYP2S1	2	1	ENSBMUG00000000748	1	ENSBMUG00000023225
MF	GO:0004620	phospholipase activity	1/269	26/9025	0.545179	0.888642	ENSBMUG00000007822	PROCA1	1	0		1	ENSBMUG00000007822
MF	GO:0051082	unfolded protein binding	1/269	26/9025	0.545179	0.888642	ENSBMUG00000011334	CLGN	1	0		1	ENSBMUG00000011334
MF	GO:0008234	cysteine-type peptidase activity	3/269	96/9025	0.549161	0.888642	ENSBMUG00000011894/ENSBMUG00000020847/ENSBMUG00000010870	CAPN11/CTSF/USP50	3	0		3	ENSBMUG00000011894/ENSBMUG00000020847/ENSBMUG00000010870
MF	GO:0022804	active transmembrane transporter activity	3/269	96/9025	0.549161	0.888642	ENSBMUG00000002758/ENSBMUG00000007666/ENSBMUG00000011670	SLC6A16/SLC6A1/SLC9B1	3	0		3	ENSBMUG00000002758/ENSBMUG00000007666/ENSBMUG00000011670
MF	GO:0046873	metal ion transmembrane transporter activity	3/269	96/9025	0.549161	0.888642	ENSBMUG00000002758/ENSBMUG00000007666/ENSBMUG00000011862	SLC6A16/SLC6A1/KCNB1	3	1	ENSBMUG00000011862	2	ENSBMUG00000002758/ENSBMUG00000007666
MF	GO:0016298	lipase activity	1/269	27/9025	0.558774	0.896053	ENSBMUG00000007822	PROCA1	1	0		1	ENSBMUG00000007822
MF	GO:0000287	magnesium ion binding	1/269	28/9025	0.571965	0.909016	ENSBMUG00000005486	-	1	0		1	ENSBMUG00000005486
MF	GO:0016763	transferase activity, transferring pentosyl groups	1/269	29/9025	0.584763	0.921131	ENSBMUG00000026826	-	1	0		1	ENSBMUG00000026826
MF	GO:0008324	cation transmembrane transporter activity	5/269	173/9025	0.591372	0.92337	ENSBMUG00000002758/ENSBMUG00000007666/ENSBMUG00000011862/ENSBMUG00000011670/ENSBMUG00000006381	SLC6A16/SLC6A1/KCNB1/SLC9B1/RHCG	5	1	ENSBMUG00000011862	4	ENSBMUG00000002758/ENSBMUG00000007666/ENSBMUG00000011670/ENSBMUG00000006381
MF	GO:0030170	pyridoxal phosphate binding	1/269	32/9025	0.620913	0.952781	ENSBMUG00000006355	GOT1L1	1	0		1	ENSBMUG00000006355
MF	GO:0070279	vitamin B6 binding	1/269	32/9025	0.620913	0.952781	ENSBMUG00000006355	GOT1L1	1	0		1	ENSBMUG00000006355
MF	GO:0022890	inorganic cation transmembrane transporter activity	4/269	145/9025	0.632239	0.96132	ENSBMUG00000002758/ENSBMUG00000007666/ENSBMUG00000011862/ENSBMUG00000011670	SLC6A16/SLC6A1/KCNB1/SLC9B1	4	1	ENSBMUG00000011862	3	ENSBMUG00000002758/ENSBMUG00000007666/ENSBMUG00000011670
MF	GO:0005044	scavenger receptor activity	1/269	34/9025	0.643254	0.96132	ENSBMUG00000022899	PRG4	1	1	ENSBMUG00000022899	0
MF	GO:0038024	cargo receptor activity	1/269	34/9025	0.643254	0.96132	ENSBMUG00000022899	PRG4	1	1	ENSBMUG00000022899	0
MF	GO:0005096	GTPase activator activity	1/269	35/9025	0.653928	0.96132	ENSBMUG00000006676	ACAP1	1	0		1	ENSBMUG00000006676
MF	GO:0004386	helicase activity	1/269	36/9025	0.664283	0.96132	ENSBMUG00000008196	TDRD9	1	0		1	ENSBMUG00000008196
MF	GO:0005244	voltage-gated ion channel activity	1/269	36/9025	0.664283	0.96132	ENSBMUG00000011862	KCNB1	1	1	ENSBMUG00000011862	0
MF	GO:0022832	voltage-gated channel activity	1/269	36/9025	0.664283	0.96132	ENSBMUG00000011862	KCNB1	1	1	ENSBMUG00000011862	0
MF	GO:0016757	transferase activity, transferring glycosyl groups	4/269	153/9025	0.673876	0.966393	ENSBMUG00000005396/ENSBMUG00000005276/ENSBMUG00000026826/ENSBMUG00000005205	GLT6D1/-/-/-	4	0		4	ENSBMUG00000005396/ENSBMUG00000005276/ENSBMUG00000026826/ENSBMUG00000005205
MF	GO:0008138	protein tyrosine/serine/threonine phosphatase activity	1/269	38/9025	0.684076	0.966393	ENSBMUG00000018940	-	1	0		1	ENSBMUG00000018940
MF	GO:0030246	carbohydrate binding	1/269	38/9025	0.684076	0.966393	ENSBMUG00000022899	PRG4	1	1	ENSBMUG00000022899	0
MF	GO:0032403	protein complex binding	1/269	40/9025	0.702707	0.977474	ENSBMUG00000016379	MYH3	1	0		1	ENSBMUG00000016379
MF	GO:0042578	phosphoric ester hydrolase activity	4/269	159/9025	0.702903	0.977474	ENSBMUG00000005486/ENSBMUG00000021688/ENSBMUG00000006980/ENSBMUG00000018940	-/ALPL/-/-	4	1	ENSBMUG00000021688	3	ENSBMUG00000005486/ENSBMUG00000006980/ENSBMUG00000018940
MF	GO:0008047	enzyme activator activity	1/269	42/9025	0.720242	0.993823	ENSBMUG00000006676	ACAP1	1	0		1	ENSBMUG00000006676
MF	GO:0008270	zinc ion binding	8/269	325/9025	0.759101	0.998647	ENSBMUG00000007537/ENSBMUG00000024821/ENSBMUG00000008829/ENSBMUG00000022187/ENSBMUG00000024807/novel.706/ENSBMUG00000017314/ENSBMUG00000006340	TRIM36/MARCH10/TRIM68/CPA3/RORC/-/TUT4/TRAF5	8	1	ENSBMUG00000008829	7	ENSBMUG00000007537/ENSBMUG00000024821/ENSBMUG00000022187/ENSBMUG00000024807/novel.706/ENSBMUG00000017314/ENSBMUG00000006340
MF	GO:0030695	GTPase regulator activity	1/269	47/9025	0.759703	0.998647	ENSBMUG00000006676	ACAP1	1	0		1	ENSBMUG00000006676
MF	GO:0016746	transferase activity, transferring acyl groups	2/269	94/9025	0.775429	0.998647	ENSBMUG00000002927/ENSBMUG00000014448	LCAT/-	2	1	ENSBMUG00000002927	1	ENSBMUG00000014448
MF	GO:0016491	oxidoreductase activity	9/269	370/9025	0.780109	0.998647	ENSBMUG00000000748/ENSBMUG00000005040/ENSBMUG00000016744/ENSBMUG00000013257/ENSBMUG00000014160/ENSBMUG00000019773/ENSBMUG00000009991/ENSBMUG00000023225/ENSBMUG00000024538	CYP26B1/-/GAPDHS/PDHA2/HMOX1/OGDHL/PAH/CYP2S1/AASS	9	2	ENSBMUG00000000748/ENSBMUG00000014160	7	ENSBMUG00000005040/ENSBMUG00000016744/ENSBMUG00000013257/ENSBMUG00000019773/ENSBMUG00000009991/ENSBMUG00000023225/ENSBMUG00000024538
MF	GO:0015078	hydrogen ion transmembrane transporter activity	1/269	50/9025	0.780664	0.998647	ENSBMUG00000011670	SLC9B1	1	0		1	ENSBMUG00000011670
MF	GO:0060589	nucleoside-triphosphatase regulator activity	1/269	51/9025	0.787238	0.998647	ENSBMUG00000006676	ACAP1	1	0		1	ENSBMUG00000006676
MF	GO:0044877	macromolecular complex binding	1/269	52/9025	0.793616	0.998647	ENSBMUG00000016379	MYH3	1	0		1	ENSBMUG00000016379
MF	GO:0016747	transferase activity, transferring acyl groups other than amino-acyl groups	1/269	54/9025	0.805805	0.998647	ENSBMUG00000002927	LCAT	1	1	ENSBMUG00000002927	0
MF	GO:0016788	hydrolase activity, acting on ester bonds	6/269	265/9025	0.807534	0.998647	ENSBMUG00000005486/ENSBMUG00000021688/ENSBMUG00000006980/ENSBMUG00000018940/ENSBMUG00000007822/ENSBMUG00000013756	-/ALPL/-/-/PROCA1/ARSB	6	2	ENSBMUG00000021688/ENSBMUG00000013756	4	ENSBMUG00000005486/ENSBMUG00000006980/ENSBMUG00000018940/ENSBMUG00000007822
MF	GO:0016887	ATPase activity	2/269	102/9025	0.812909	0.998647	novel.7/ENSBMUG00000007850	-/DNAH1	2	0		2	novel.7/ENSBMUG00000007850
MF	GO:0046914	transition metal ion binding	10/269	423/9025	0.817125	0.998647	ENSBMUG00000000748/ENSBMUG00000007537/ENSBMUG00000024821/ENSBMUG00000008829/ENSBMUG00000022187/ENSBMUG00000024807/novel.706/ENSBMUG00000017314/ENSBMUG00000006340/ENSBMUG00000023225	CYP26B1/TRIM36/MARCH10/TRIM68/CPA3/RORC/-/TUT4/TRAF5/CYP2S1	10	2	ENSBMUG00000000748/ENSBMUG00000008829	8	ENSBMUG00000007537/ENSBMUG00000024821/ENSBMUG00000022187/ENSBMUG00000024807/novel.706/ENSBMUG00000017314/ENSBMUG00000006340/ENSBMUG00000023225
MF	GO:0005261	cation channel activity	1/269	60/9025	0.838235	0.998647	ENSBMUG00000011862	KCNB1	1	1	ENSBMUG00000011862	0
MF	GO:0017111	nucleoside-triphosphatase activity	10/269	435/9025	0.84236	0.998647	ENSBMUG00000007273/ENSBMUG00000016767/ENSBMUG00000016898/ENSBMUG00000008196/ENSBMUG00000004035/novel.7/ENSBMUG00000007850/ENSBMUG00000017263/ENSBMUG00000016379/ENSBMUG00000025738	KIF2B/KIF2C/RAB31/TDRD9/KIF5C/-/DNAH1/-/MYH3/MYO1F	10	1	ENSBMUG00000016898	9	ENSBMUG00000007273/ENSBMUG00000016767/ENSBMUG00000008196/ENSBMUG00000004035/novel.7/ENSBMUG00000007850/ENSBMUG00000017263/ENSBMUG00000016379/ENSBMUG00000025738
MF	GO:0016779	nucleotidyltransferase activity	1/269	61/9025	0.843089	0.998647	ENSBMUG00000017314	TUT4	1	0		1	ENSBMUG00000017314
MF	GO:0036459	thiol-dependent ubiquitinyl hydrolase activity	1/269	61/9025	0.843089	0.998647	ENSBMUG00000010870	USP50	1	0		1	ENSBMUG00000010870
MF	GO:0101005	ubiquitinyl hydrolase activity	1/269	61/9025	0.843089	0.998647	ENSBMUG00000010870	USP50	1	0		1	ENSBMUG00000010870
MF	GO:0019783	ubiquitin-like protein-specific protease activity	1/269	62/9025	0.847798	0.998647	ENSBMUG00000010870	USP50	1	0		1	ENSBMUG00000010870
MF	GO:0004930	G-protein coupled receptor activity	5/269	242/9025	0.853171	0.998647	ENSBMUG00000001530/ENSBMUG00000004634/ENSBMUG00000008325/ENSBMUG00000013264/ENSBMUG00000014681	GPR157/MCHR1/HCRTR1/CELSR3/-	5	4	ENSBMUG00000001530/ENSBMUG00000004634/ENSBMUG00000008325/ENSBMUG00000014681	1	ENSBMUG00000013264
MF	GO:0016462	pyrophosphatase activity	10/269	442/9025	0.85579	0.998647	ENSBMUG00000007273/ENSBMUG00000016767/ENSBMUG00000016898/ENSBMUG00000008196/ENSBMUG00000004035/novel.7/ENSBMUG00000007850/ENSBMUG00000017263/ENSBMUG00000016379/ENSBMUG00000025738	KIF2B/KIF2C/RAB31/TDRD9/KIF5C/-/DNAH1/-/MYH3/MYO1F	10	1	ENSBMUG00000016898	9	ENSBMUG00000007273/ENSBMUG00000016767/ENSBMUG00000008196/ENSBMUG00000004035/novel.7/ENSBMUG00000007850/ENSBMUG00000017263/ENSBMUG00000016379/ENSBMUG00000025738
MF	GO:0016818	hydrolase activity, acting on acid anhydrides, in phosphorus-containing anhydrides	10/269	445/9025	0.861264	0.998647	ENSBMUG00000007273/ENSBMUG00000016767/ENSBMUG00000016898/ENSBMUG00000008196/ENSBMUG00000004035/novel.7/ENSBMUG00000007850/ENSBMUG00000017263/ENSBMUG00000016379/ENSBMUG00000025738	KIF2B/KIF2C/RAB31/TDRD9/KIF5C/-/DNAH1/-/MYH3/MYO1F	10	1	ENSBMUG00000016898	9	ENSBMUG00000007273/ENSBMUG00000016767/ENSBMUG00000008196/ENSBMUG00000004035/novel.7/ENSBMUG00000007850/ENSBMUG00000017263/ENSBMUG00000016379/ENSBMUG00000025738
MF	GO:0005088	Ras guanyl-nucleotide exchange factor activity	1/269	66/9025	0.865266	0.998647	ENSBMUG00000016217	FGD2	1	0		1	ENSBMUG00000016217
MF	GO:0005089	Rho guanyl-nucleotide exchange factor activity	1/269	66/9025	0.865266	0.998647	ENSBMUG00000016217	FGD2	1	0		1	ENSBMUG00000016217
MF	GO:0001071	nucleic acid binding transcription factor activity	6/269	289/9025	0.866829	0.998647	ENSBMUG00000000869/ENSBMUG00000008022/ENSBMUG00000005080/ENSBMUG00000024807/ENSBMUG00000018114/ENSBMUG00000010013	FOSL1/MYC/ETS2/RORC/FOXM1/-	6	1	ENSBMUG00000005080	5	ENSBMUG00000000869/ENSBMUG00000008022/ENSBMUG00000024807/ENSBMUG00000018114/ENSBMUG00000010013
MF	GO:0003700	transcription factor activity, sequence-specific DNA binding	6/269	289/9025	0.866829	0.998647	ENSBMUG00000000869/ENSBMUG00000008022/ENSBMUG00000005080/ENSBMUG00000024807/ENSBMUG00000018114/ENSBMUG00000010013	FOSL1/MYC/ETS2/RORC/FOXM1/-	6	1	ENSBMUG00000005080	5	ENSBMUG00000000869/ENSBMUG00000008022/ENSBMUG00000024807/ENSBMUG00000018114/ENSBMUG00000010013
MF	GO:0003779	actin binding	1/269	67/9025	0.869312	0.998647	ENSBMUG00000016379	MYH3	1	0		1	ENSBMUG00000016379
MF	GO:0016817	hydrolase activity, acting on acid anhydrides	10/269	455/9025	0.878334	0.998647	ENSBMUG00000007273/ENSBMUG00000016767/ENSBMUG00000016898/ENSBMUG00000008196/ENSBMUG00000004035/novel.7/ENSBMUG00000007850/ENSBMUG00000017263/ENSBMUG00000016379/ENSBMUG00000025738	KIF2B/KIF2C/RAB31/TDRD9/KIF5C/-/DNAH1/-/MYH3/MYO1F	10	1	ENSBMUG00000016898	9	ENSBMUG00000007273/ENSBMUG00000016767/ENSBMUG00000008196/ENSBMUG00000004035/novel.7/ENSBMUG00000007850/ENSBMUG00000017263/ENSBMUG00000016379/ENSBMUG00000025738
MF	GO:0016874	ligase activity	1/269	74/9025	0.894436	0.998647	ENSBMUG00000022222	ACACB	1	1	ENSBMUG00000022222	0
MF	GO:0099600	transmembrane receptor activity	7/269	346/9025	0.896547	0.998647	ENSBMUG00000001530/ENSBMUG00000004634/ENSBMUG00000008325/ENSBMUG00000005876/ENSBMUG00000013264/ENSBMUG00000014681/ENSBMUG00000009060	GPR157/MCHR1/HCRTR1/CHRND/CELSR3/-/GRIN2B	7	4	ENSBMUG00000001530/ENSBMUG00000004634/ENSBMUG00000008325/ENSBMUG00000014681	3	ENSBMUG00000005876/ENSBMUG00000013264/ENSBMUG00000009060
MF	GO:0004872	receptor activity	8/269	388/9025	0.898356	0.998647	ENSBMUG00000001530/ENSBMUG00000022899/ENSBMUG00000004634/ENSBMUG00000008325/ENSBMUG00000005876/ENSBMUG00000013264/ENSBMUG00000014681/ENSBMUG00000009060	GPR157/PRG4/MCHR1/HCRTR1/CHRND/CELSR3/-/GRIN2B	8	5	ENSBMUG00000001530/ENSBMUG00000022899/ENSBMUG00000004634/ENSBMUG00000008325/ENSBMUG00000014681	3	ENSBMUG00000005876/ENSBMUG00000013264/ENSBMUG00000009060
MF	GO:0060089	molecular transducer activity	8/269	388/9025	0.898356	0.998647	ENSBMUG00000001530/ENSBMUG00000022899/ENSBMUG00000004634/ENSBMUG00000008325/ENSBMUG00000005876/ENSBMUG00000013264/ENSBMUG00000014681/ENSBMUG00000009060	GPR157/PRG4/MCHR1/HCRTR1/CHRND/CELSR3/-/GRIN2B	8	5	ENSBMUG00000001530/ENSBMUG00000022899/ENSBMUG00000004634/ENSBMUG00000008325/ENSBMUG00000014681	3	ENSBMUG00000005876/ENSBMUG00000013264/ENSBMUG00000009060
MF	GO:0008168	methyltransferase activity	1/269	77/9025	0.903671	0.998647	ENSBMUG00000018523	METTL7B	1	1	ENSBMUG00000018523	0
MF	GO:0004888	transmembrane signaling receptor activity	6/269	313/9025	0.910175	0.998647	ENSBMUG00000001530/ENSBMUG00000004634/ENSBMUG00000008325/ENSBMUG00000013264/ENSBMUG00000014681/ENSBMUG00000009060	GPR157/MCHR1/HCRTR1/CELSR3/-/GRIN2B	6	4	ENSBMUG00000001530/ENSBMUG00000004634/ENSBMUG00000008325/ENSBMUG00000014681	2	ENSBMUG00000013264/ENSBMUG00000009060
MF	GO:0038023	signaling receptor activity	6/269	315/9025	0.913167	0.998647	ENSBMUG00000001530/ENSBMUG00000004634/ENSBMUG00000008325/ENSBMUG00000013264/ENSBMUG00000014681/ENSBMUG00000009060	GPR157/MCHR1/HCRTR1/CELSR3/-/GRIN2B	6	4	ENSBMUG00000001530/ENSBMUG00000004634/ENSBMUG00000008325/ENSBMUG00000014681	2	ENSBMUG00000013264/ENSBMUG00000009060
MF	GO:0016741	transferase activity, transferring one-carbon groups	1/269	82/9025	0.917309	0.998647	ENSBMUG00000018523	METTL7B	1	1	ENSBMUG00000018523	0
MF	GO:0004721	phosphoprotein phosphatase activity	1/269	85/9025	0.924549	0.998647	ENSBMUG00000018940	-	1	0		1	ENSBMUG00000018940
MF	GO:0004871	signal transducer activity	6/269	349/9025	0.9523	0.998647	ENSBMUG00000001530/ENSBMUG00000004634/ENSBMUG00000008325/ENSBMUG00000013264/ENSBMUG00000014681/ENSBMUG00000009060	GPR157/MCHR1/HCRTR1/CELSR3/-/GRIN2B	6	4	ENSBMUG00000001530/ENSBMUG00000004634/ENSBMUG00000008325/ENSBMUG00000014681	2	ENSBMUG00000013264/ENSBMUG00000009060
MF	GO:0005085	guanyl-nucleotide exchange factor activity	1/269	105/9025	0.959073	0.998647	ENSBMUG00000016217	FGD2	1	0		1	ENSBMUG00000016217
MF	GO:0048037	cofactor binding	1/269	127/9025	0.979151	0.998647	ENSBMUG00000006355	GOT1L1	1	0		1	ENSBMUG00000006355
MF	GO:0001883	purine nucleoside binding	3/269	259/9025	0.985042	0.998647	ENSBMUG00000018463/ENSBMUG00000010378/ENSBMUG00000016898	-/SEPT12/RAB31	3	1	ENSBMUG00000016898	2	ENSBMUG00000018463/ENSBMUG00000010378
MF	GO:0005525	GTP binding	3/269	259/9025	0.985042	0.998647	ENSBMUG00000018463/ENSBMUG00000010378/ENSBMUG00000016898	-/SEPT12/RAB31	3	1	ENSBMUG00000016898	2	ENSBMUG00000018463/ENSBMUG00000010378
MF	GO:0032549	ribonucleoside binding	3/269	259/9025	0.985042	0.998647	ENSBMUG00000018463/ENSBMUG00000010378/ENSBMUG00000016898	-/SEPT12/RAB31	3	1	ENSBMUG00000016898	2	ENSBMUG00000018463/ENSBMUG00000010378
MF	GO:0032550	purine ribonucleoside binding	3/269	259/9025	0.985042	0.998647	ENSBMUG00000018463/ENSBMUG00000010378/ENSBMUG00000016898	-/SEPT12/RAB31	3	1	ENSBMUG00000016898	2	ENSBMUG00000018463/ENSBMUG00000010378
MF	GO:0032561	guanyl ribonucleotide binding	3/269	259/9025	0.985042	0.998647	ENSBMUG00000018463/ENSBMUG00000010378/ENSBMUG00000016898	-/SEPT12/RAB31	3	1	ENSBMUG00000016898	2	ENSBMUG00000018463/ENSBMUG00000010378
MF	GO:0001882	nucleoside binding	3/269	260/9025	0.985399	0.998647	ENSBMUG00000018463/ENSBMUG00000010378/ENSBMUG00000016898	-/SEPT12/RAB31	3	1	ENSBMUG00000016898	2	ENSBMUG00000018463/ENSBMUG00000010378
MF	GO:0003723	RNA binding	2/269	205/9025	0.985983	0.998647	ENSBMUG00000015534/ENSBMUG00000001596	ADAD1/HEXIM1	2	1	ENSBMUG00000001596	1	ENSBMUG00000015534
MF	GO:0019001	guanyl nucleotide binding	3/269	274/9025	0.989618	0.998647	ENSBMUG00000018463/ENSBMUG00000010378/ENSBMUG00000016898	-/SEPT12/RAB31	3	1	ENSBMUG00000016898	2	ENSBMUG00000018463/ENSBMUG00000010378
MF	GO:0003735	structural constituent of ribosome	1/269	157/9025	0.991712	0.998647	ENSBMUG00000025320	RPL10L	1	0		1	ENSBMUG00000025320
MF	GO:0005198	structural molecule activity	2/269	231/9025	0.993037	0.998647	ENSBMUG00000025320/ENSBMUG00000008686	RPL10L/-	2	0		2	ENSBMUG00000025320/ENSBMUG00000008686
MF	GO:0003924	GTPase activity	1/269	217/9025	0.998703	0.998703	ENSBMUG00000016898	RAB31	1	1	ENSBMUG00000016898	0
